# Supplementary material for: How farmers think about insects: perceptions of biodiversity, biodiversity loss and attitudes towards insect-friendly farming practices
Source: Springer Nature journal article supplement (doi:10.1007/s10531-021-02235-2), 2021-07-19
Supplement: MOESM2 [file 19374488]

**Interview guideline for semi-structured interviews with farmers on the topic “Guiding principles of an insect-friendly agriculture from a practical perspective”**

| Topic                   | Key questions                                                                                                                                                                                                                                                                                                                                                                                                    |
|-------------------------|------------------------------------------------------------------------------------------------------------------------------------------------------------------------------------------------------------------------------------------------------------------------------------------------------------------------------------------------------------------------------------------------------------------|
| Operating information   | Legal form:<br>Main occupation / sideline:<br>Operational orientation:<br>Conventional / integrated / organic production:<br>Size of the operating area in ha:<br>Average soil quality:<br>Share of grassland / farmland / renewable raw materials in ha:<br>Cultivated crops of the past 3 years (including energy crops):<br>Use of grassland:<br>Leased land in ha:<br>Livestock:<br>Funding programs / AUMs: |
| Personal information    | Are you the operating manager?<br>How many years of agricultural experience do you have?<br>Age<br>Gender                                                                                                                                                                                                                                                                                                        |
| Renewable raw materials | How is the demand for your renewable raw materials? Is there a reliable or continuous demand?                                                                                                                                                                                                                                                                                                                    |

|                                          |                                                                                                                                                                                                                                                     |
|------------------------------------------|-----------------------------------------------------------------------------------------------------------------------------------------------------------------------------------------------------------------------------------------------------|
| Significance of insects and problem view | What is the significance of insect diversity for your farm and your region? Do you notice a decrease in insects? How? Which?                                                                                                                        |
| Need of insect friendly measures         | Do you see a need for insect-promoting measures for your farm and for agriculture in general? (Pest control, pollination, etc.)<br>What measures could you imagine implementing, especially if you are thinking of growing renewable raw materials? |
| Experiences                              | Are you already implementing measures that promote insects? Which?                                                                                                                                                                                  |
| Negative effects                         | Do you also observe negative effects due to insects on your farm, e.g. pests?                                                                                                                                                                       |
| Measures in the landscape laboratory     | In your opinion, where should the measures be implemented: in arable land, grassland, marginal strips, landscape elements such as hedges, riparian strips, shrubs or a combination of measures in agricultural and unused areas?                    |
| Experimentation                          | Is there space for experiments on your land or is the land use strictly defined? Are there options for an introduction of insect-friendly measures?                                                                                                 |
| On-site visit                            | Are you interested in a joint on-site visit?                                                                                                                                                                                                        |
| Actors / stakeholders                    | From your perspective, which other actors and stakeholders are relevant for the development of insect-promoting measures?<br>Are there conflicting interests between the actors/stakeholders?                                                       |
| Contribution to overall objective        | The overall project has a pilot character, the aim is that the farmers themselves initiate a change (transformation) towards more insect-friendly agriculture. To what extent can you imagine contributing to this aim?                             |
