# Supplementary figures and images for: How farmers think about insects: perceptions of biodiversity, biodiversity loss and attitudes towards insect-friendly farming practices
Source: Springer Nature journal article supplement (doi:10.1007/s10531-021-02235-2), 2021-07-19

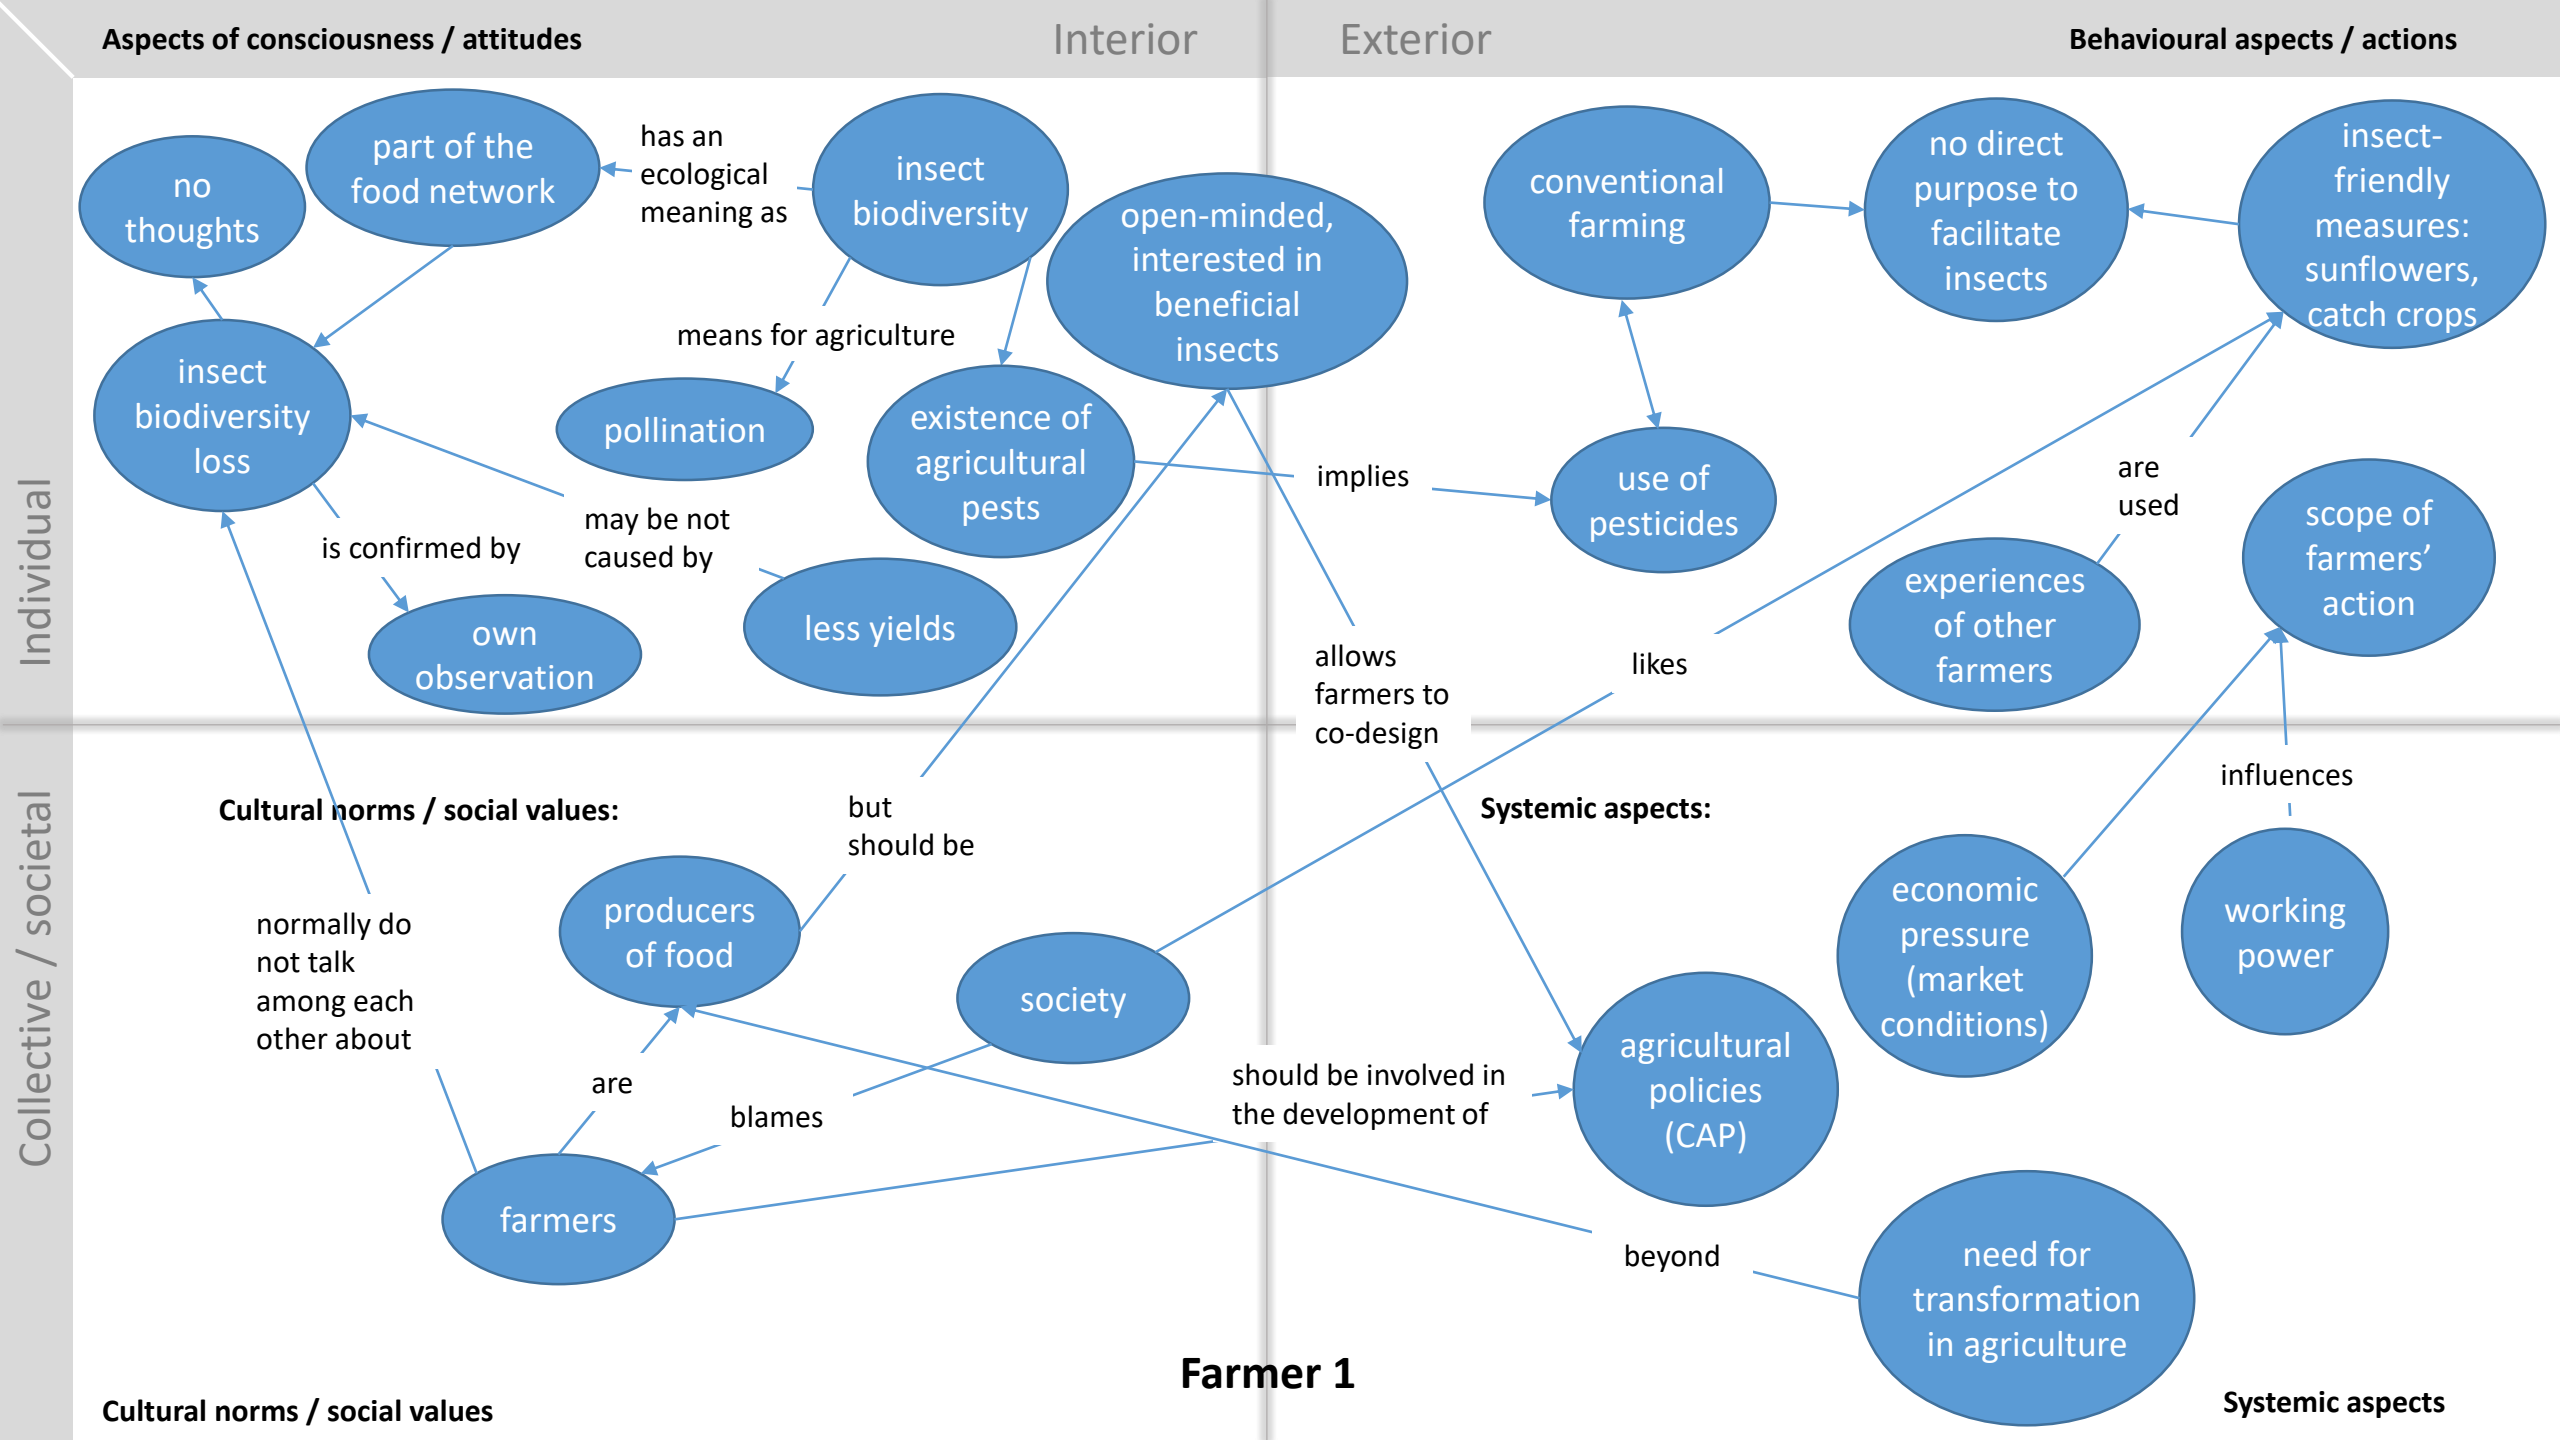

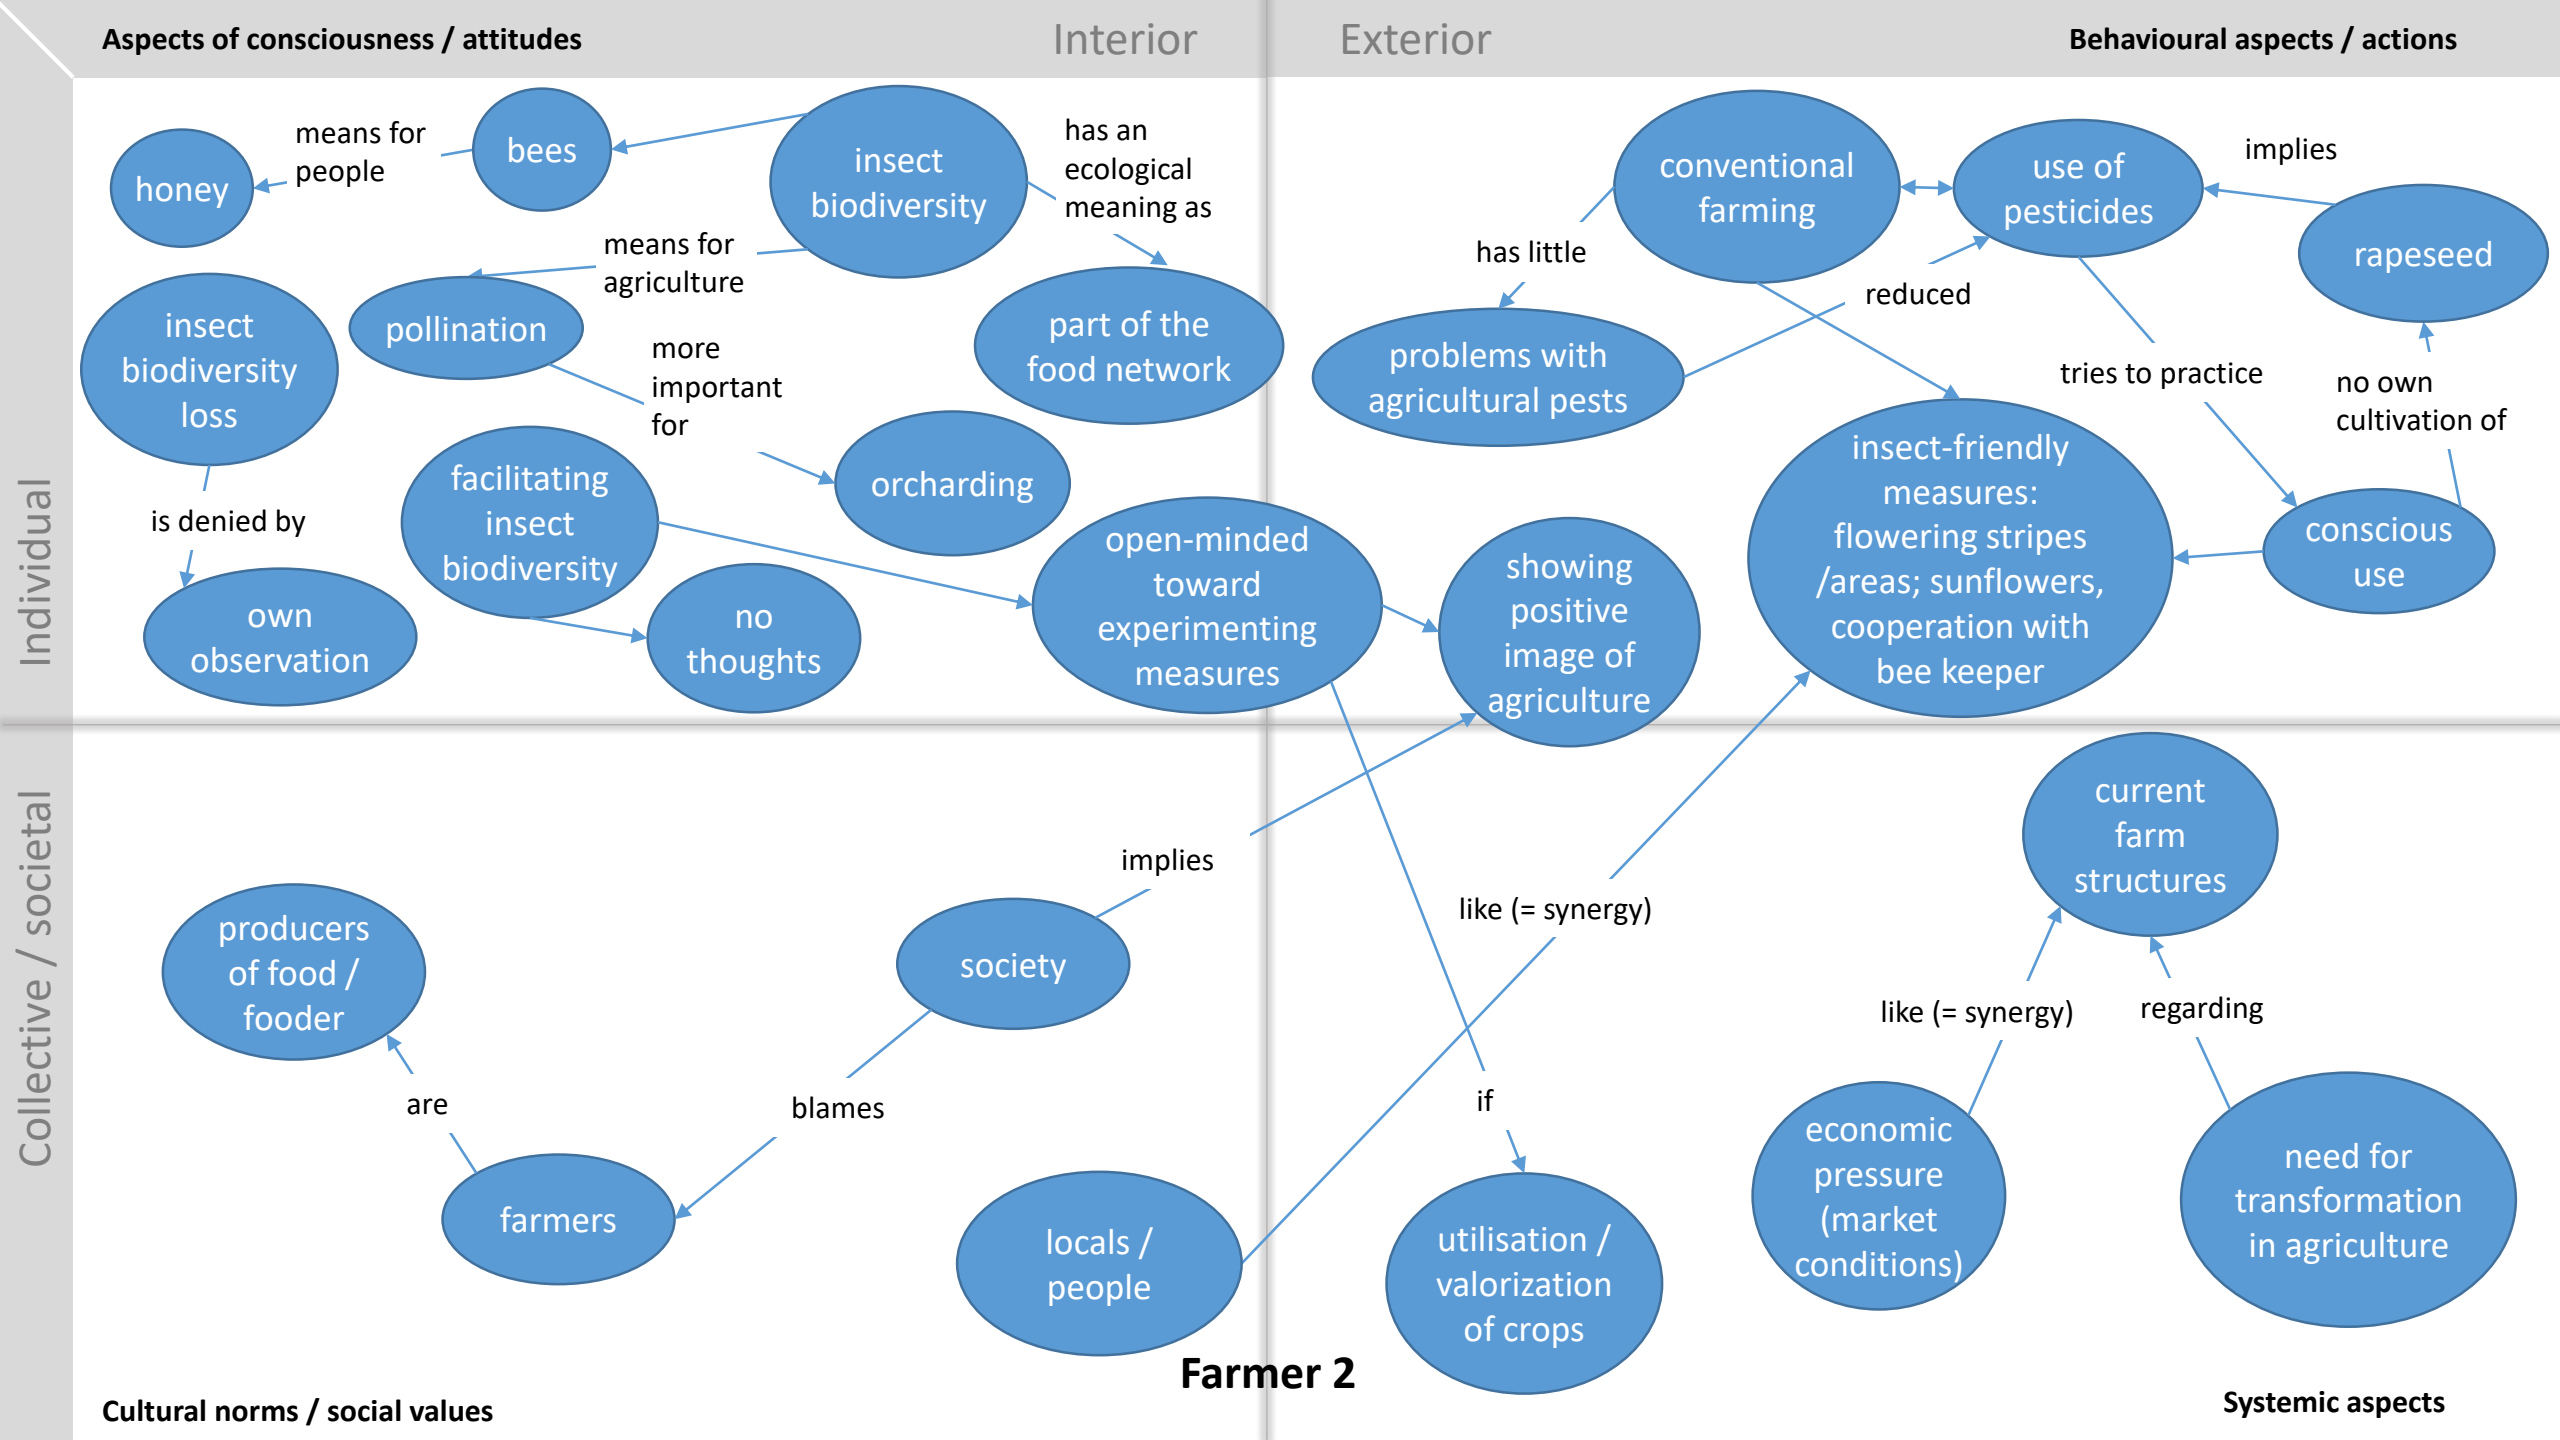

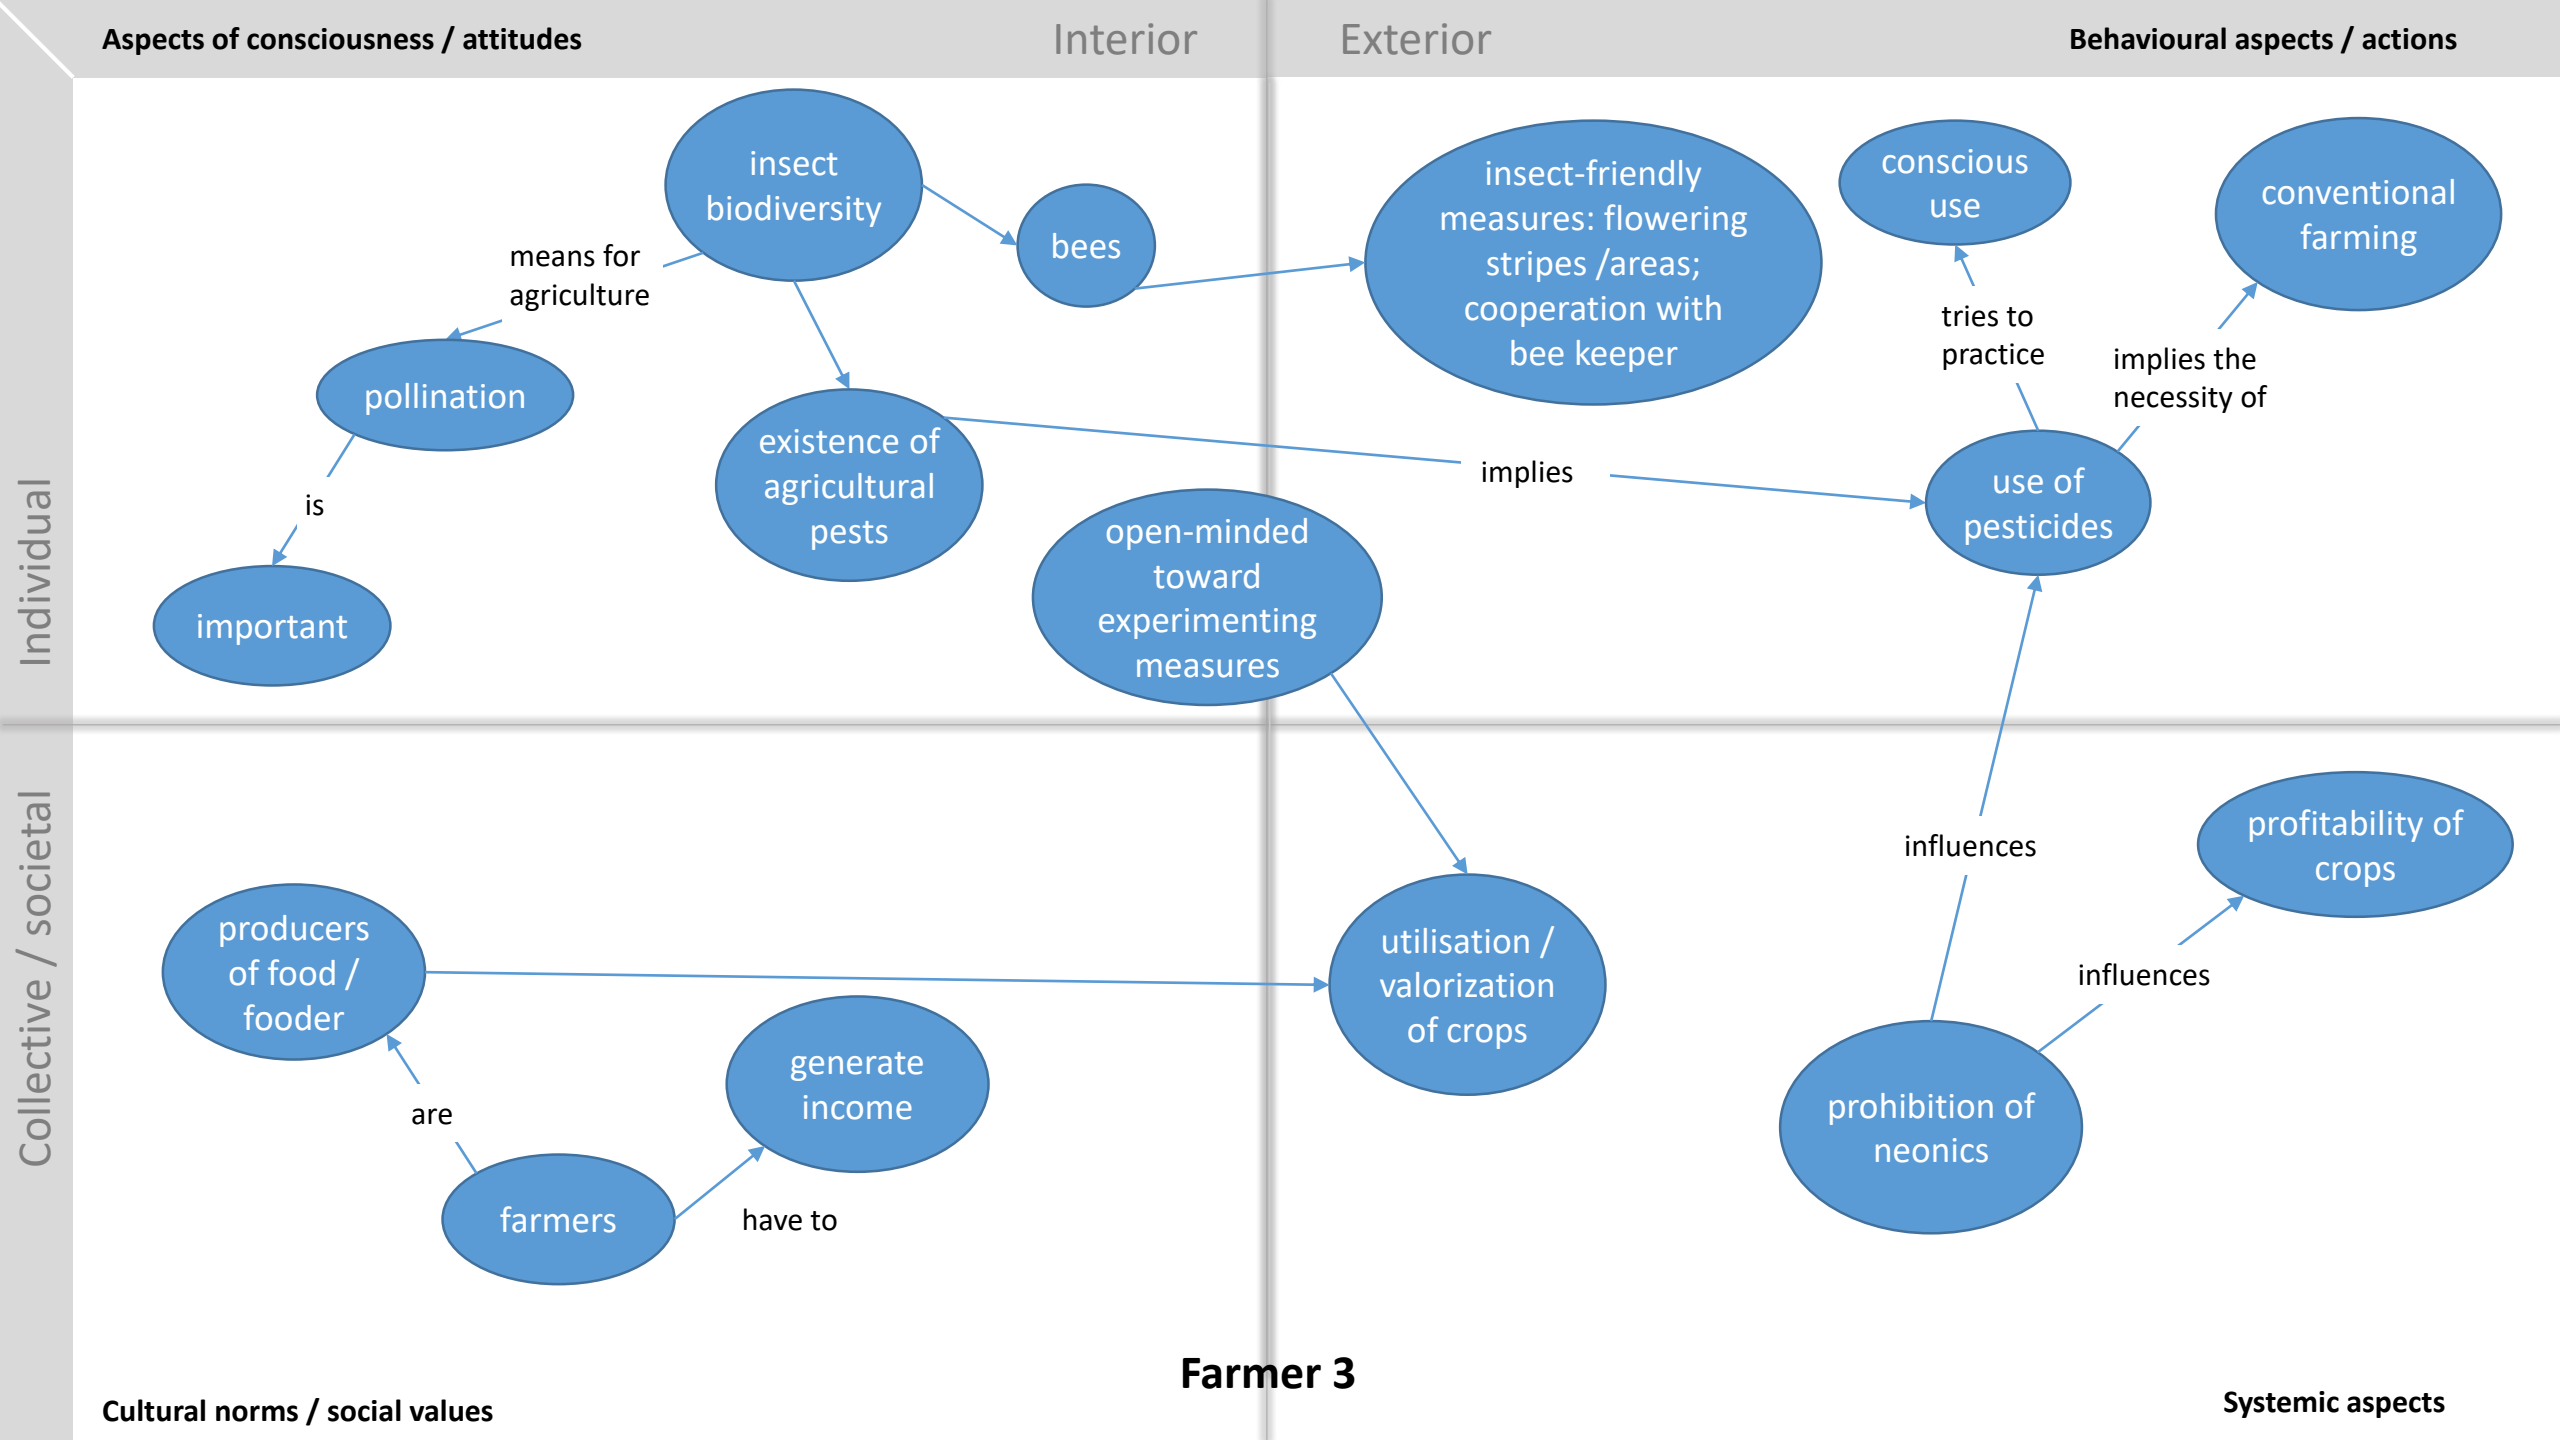

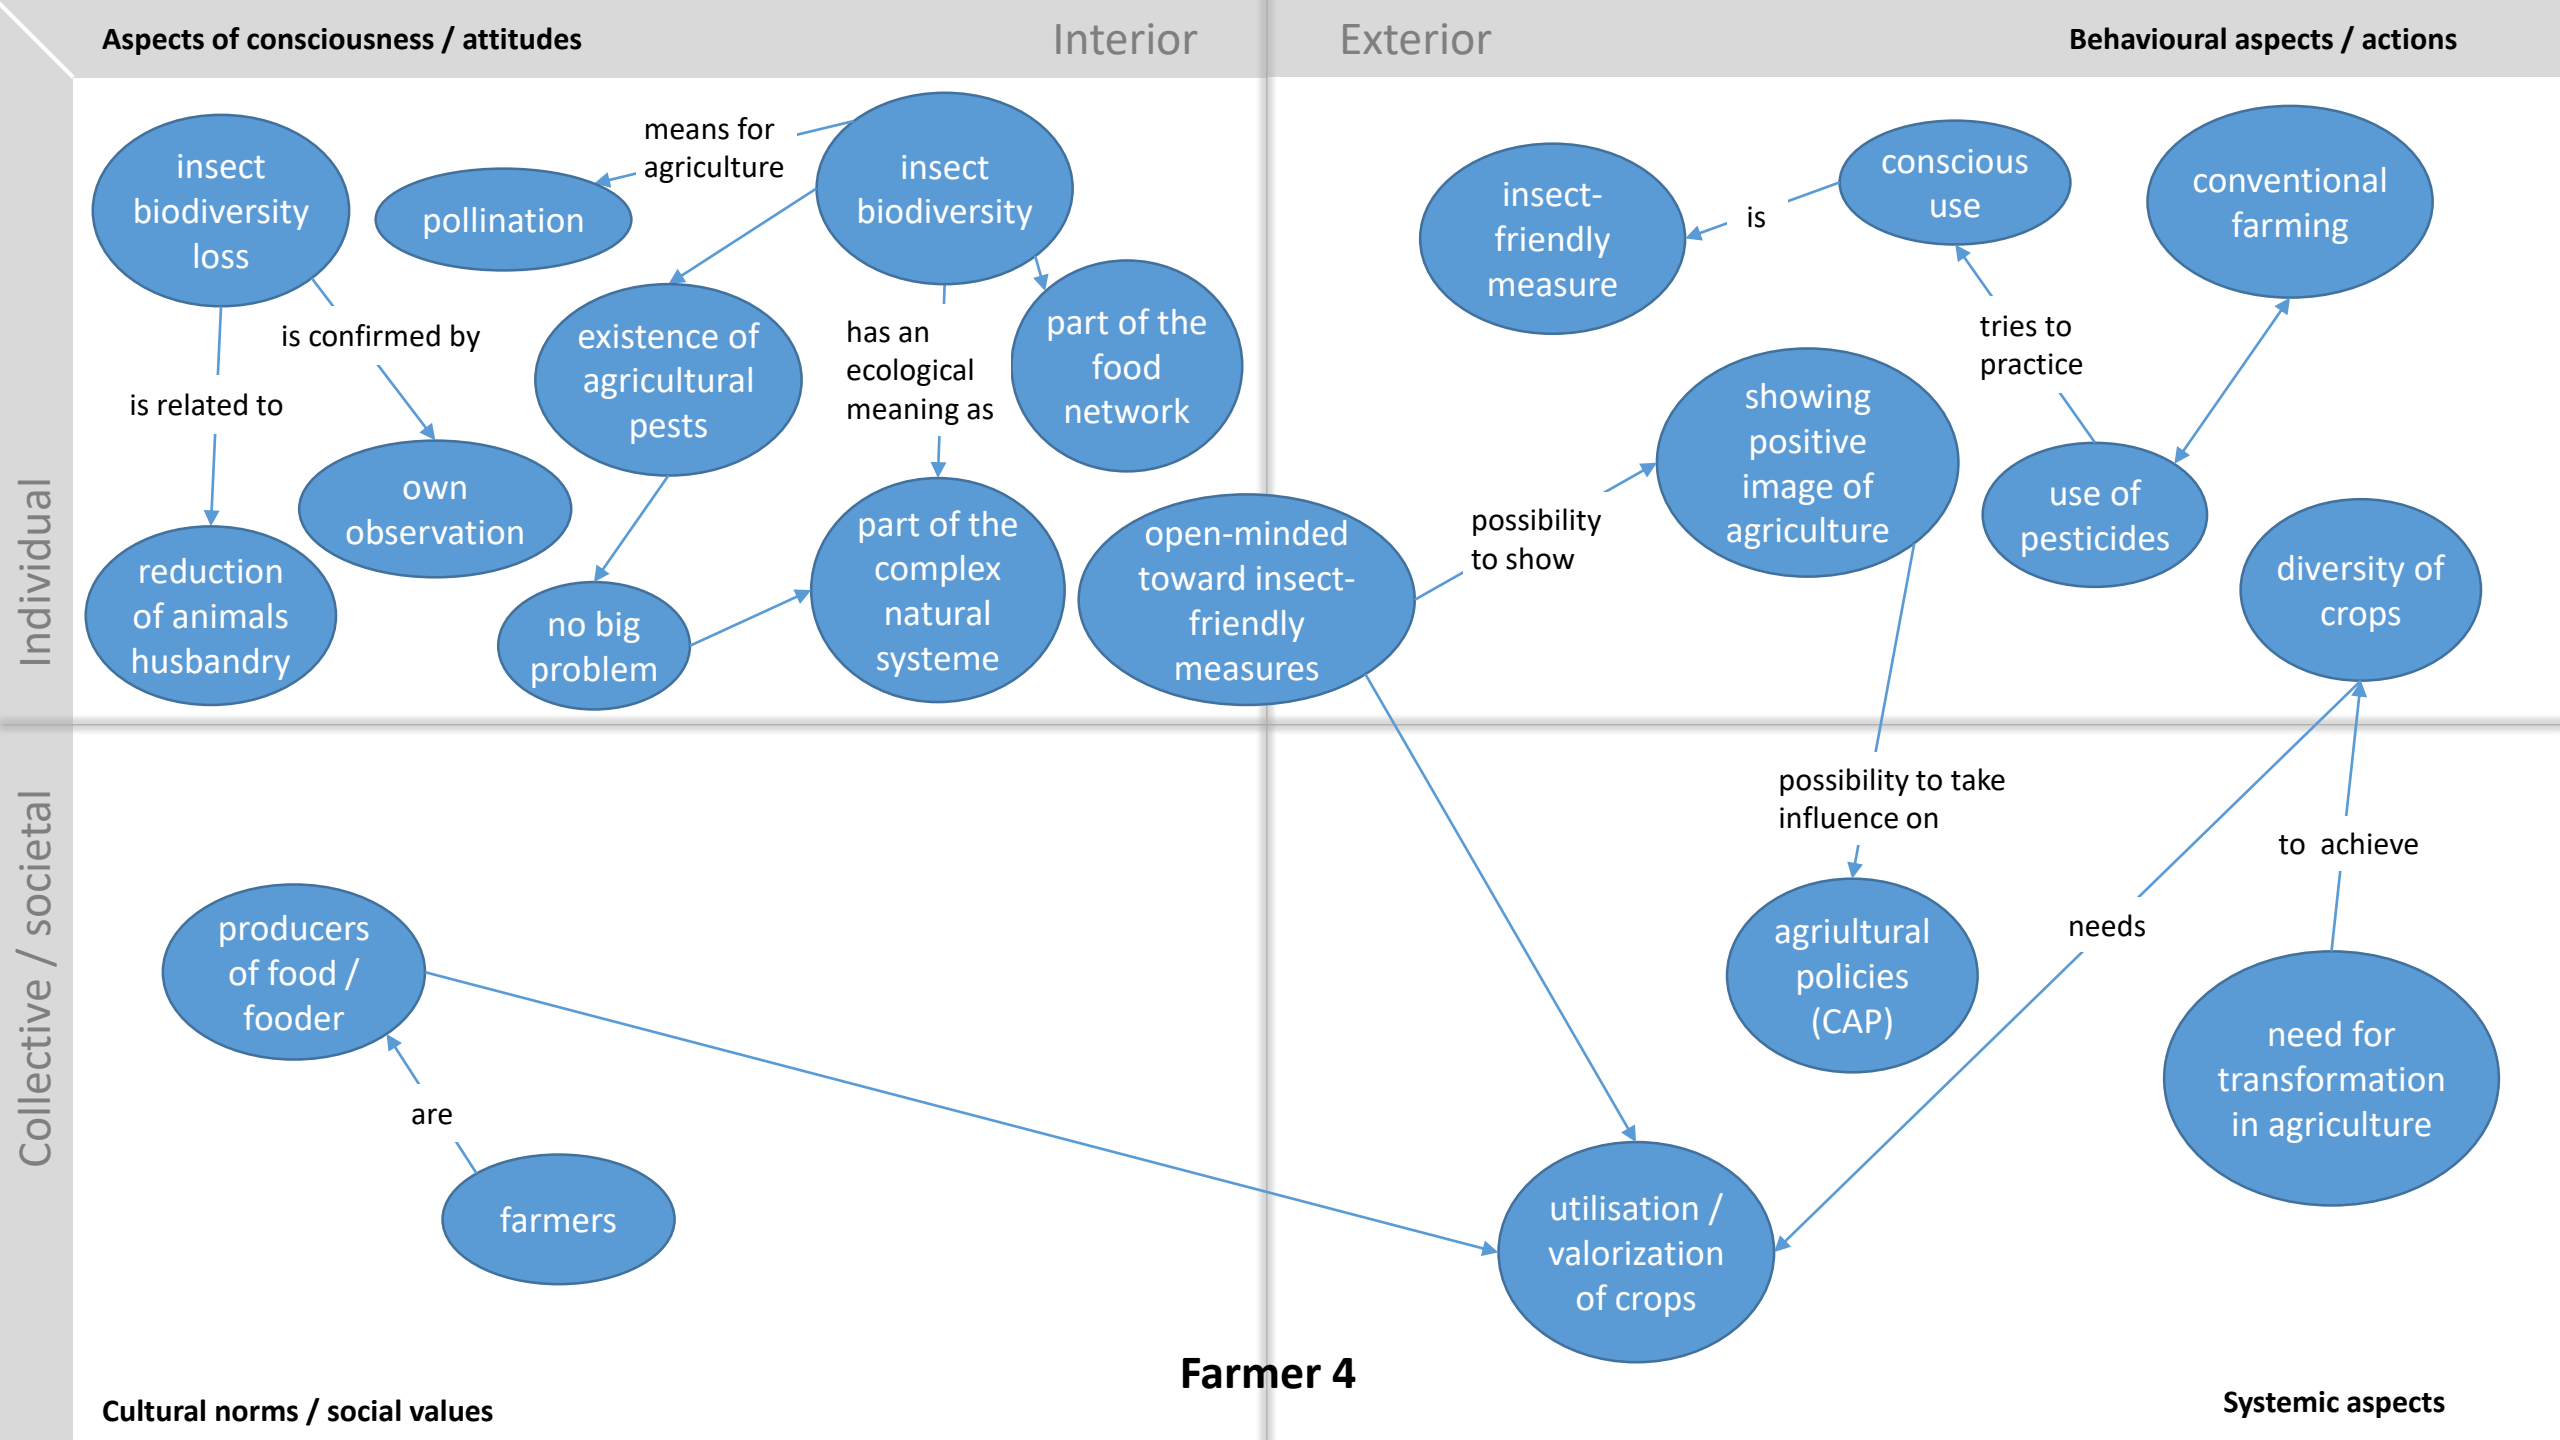

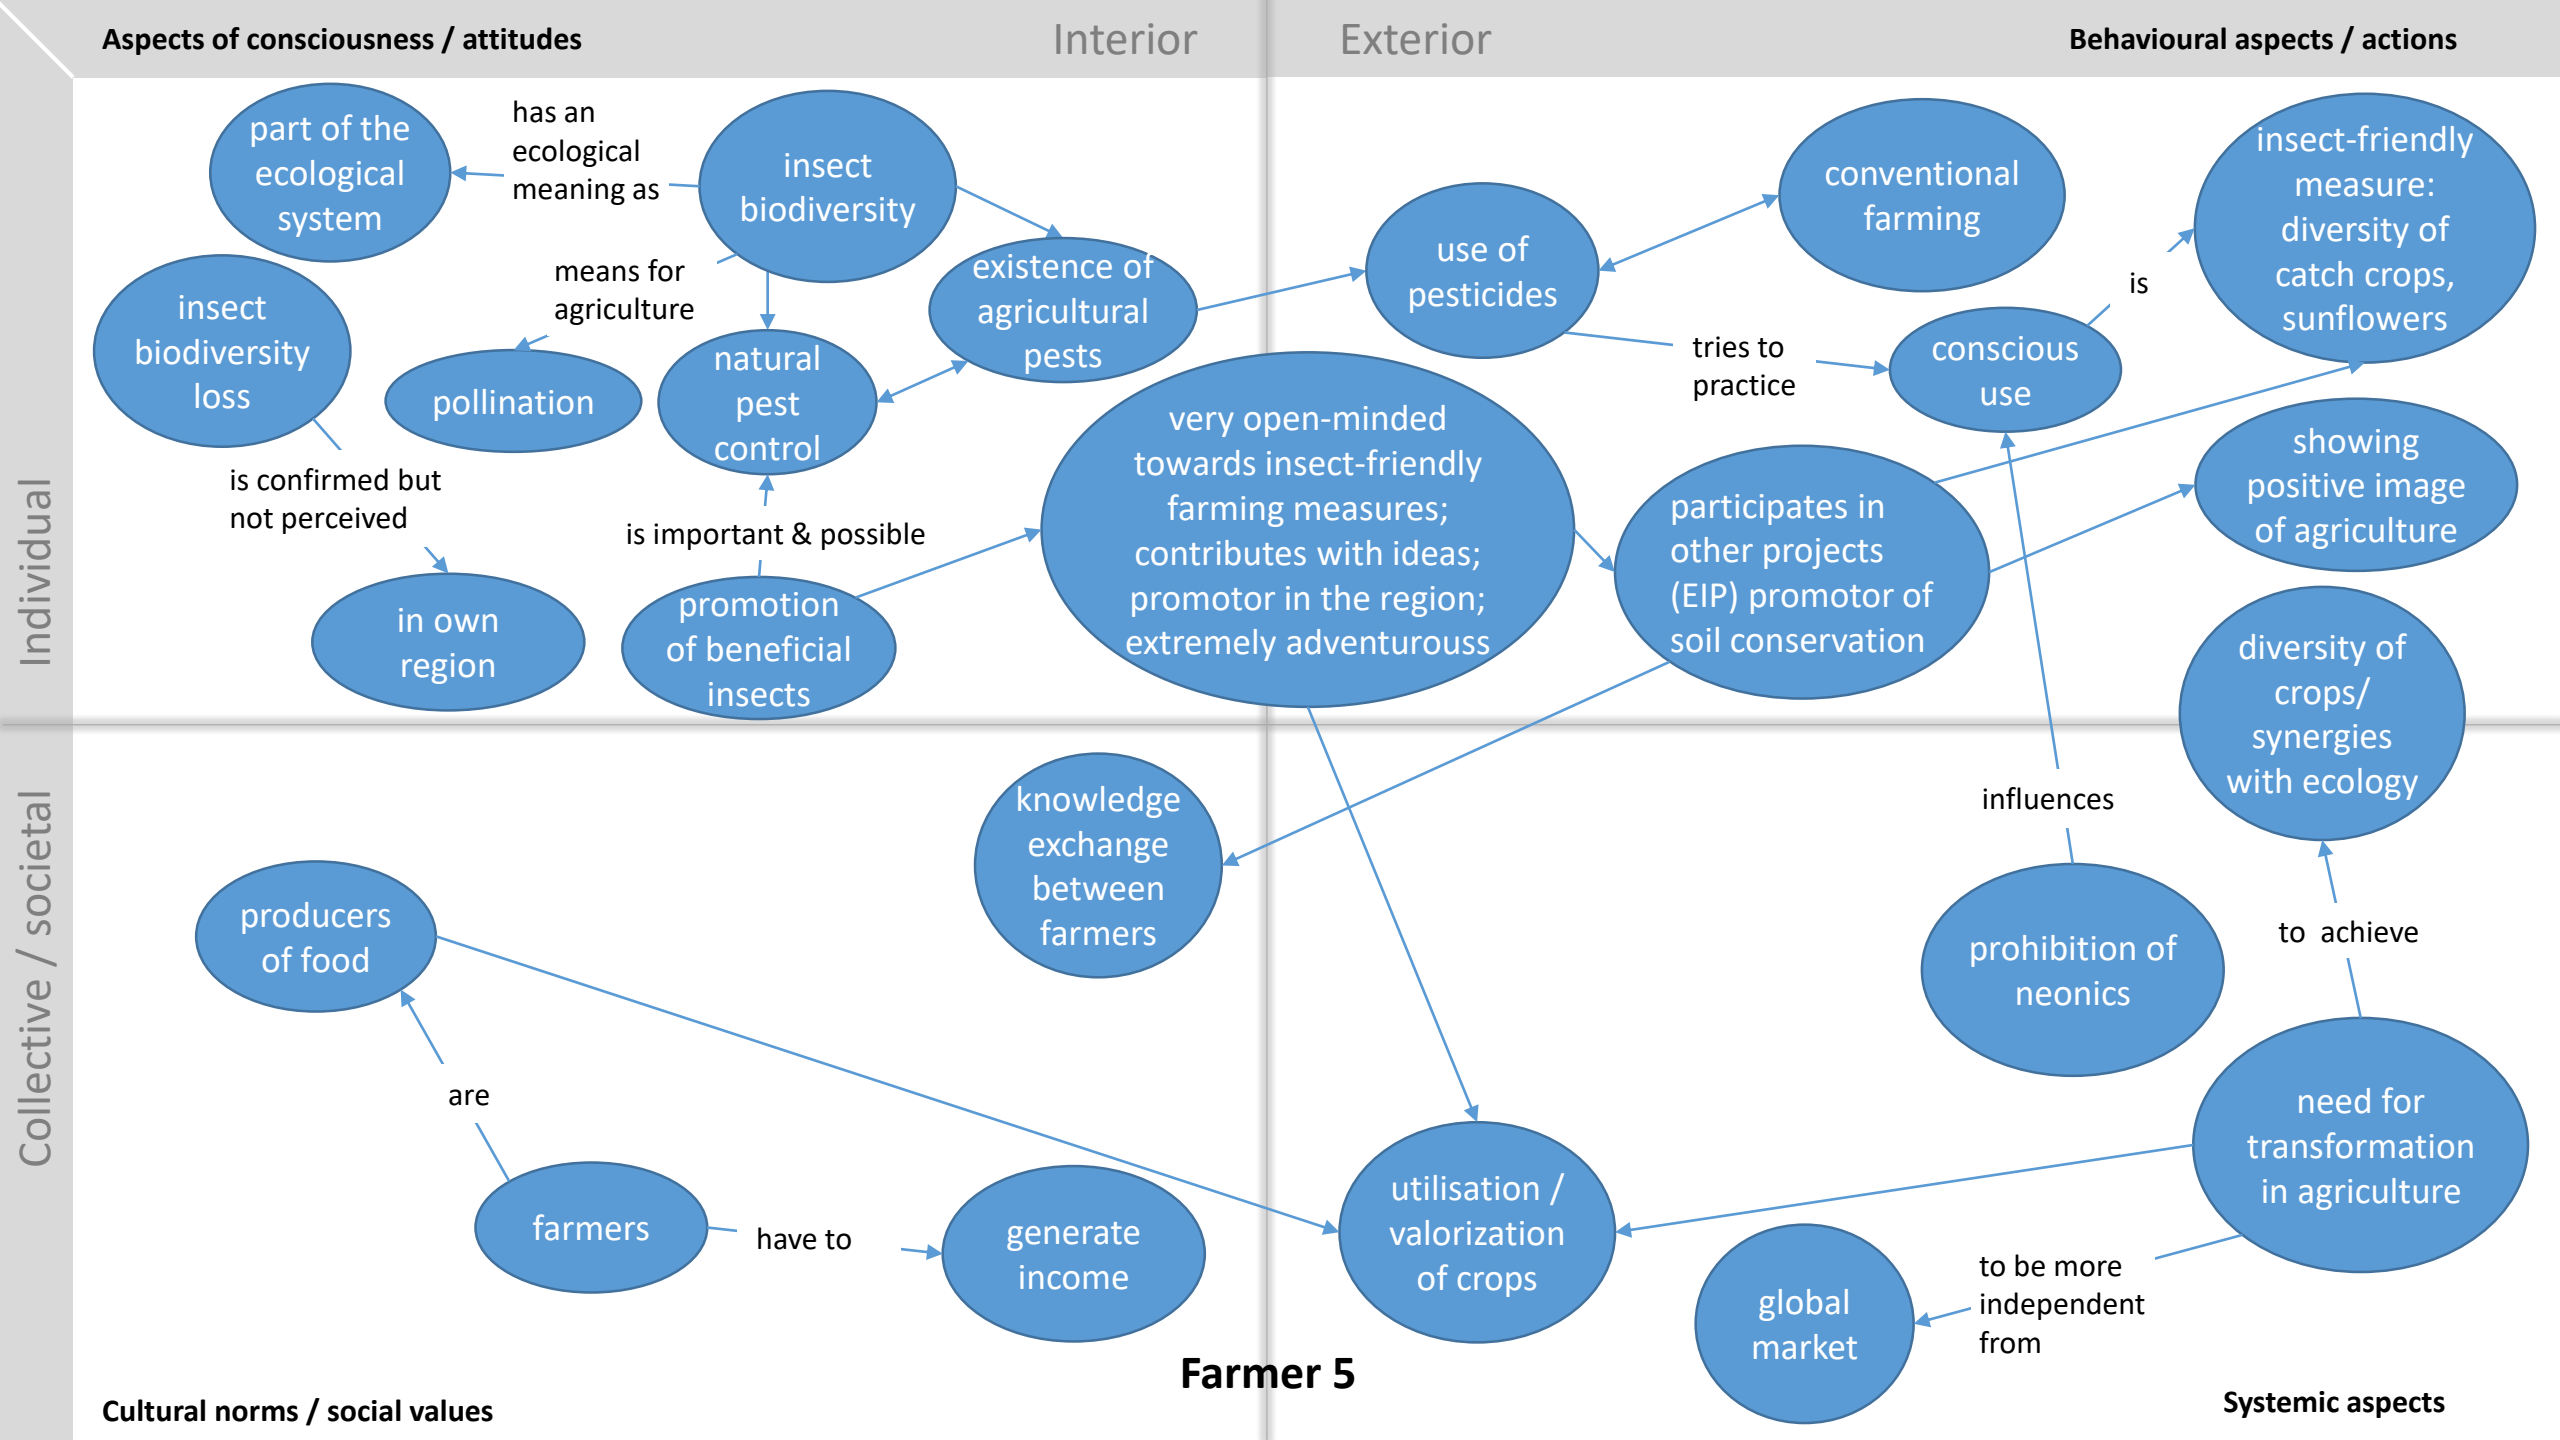

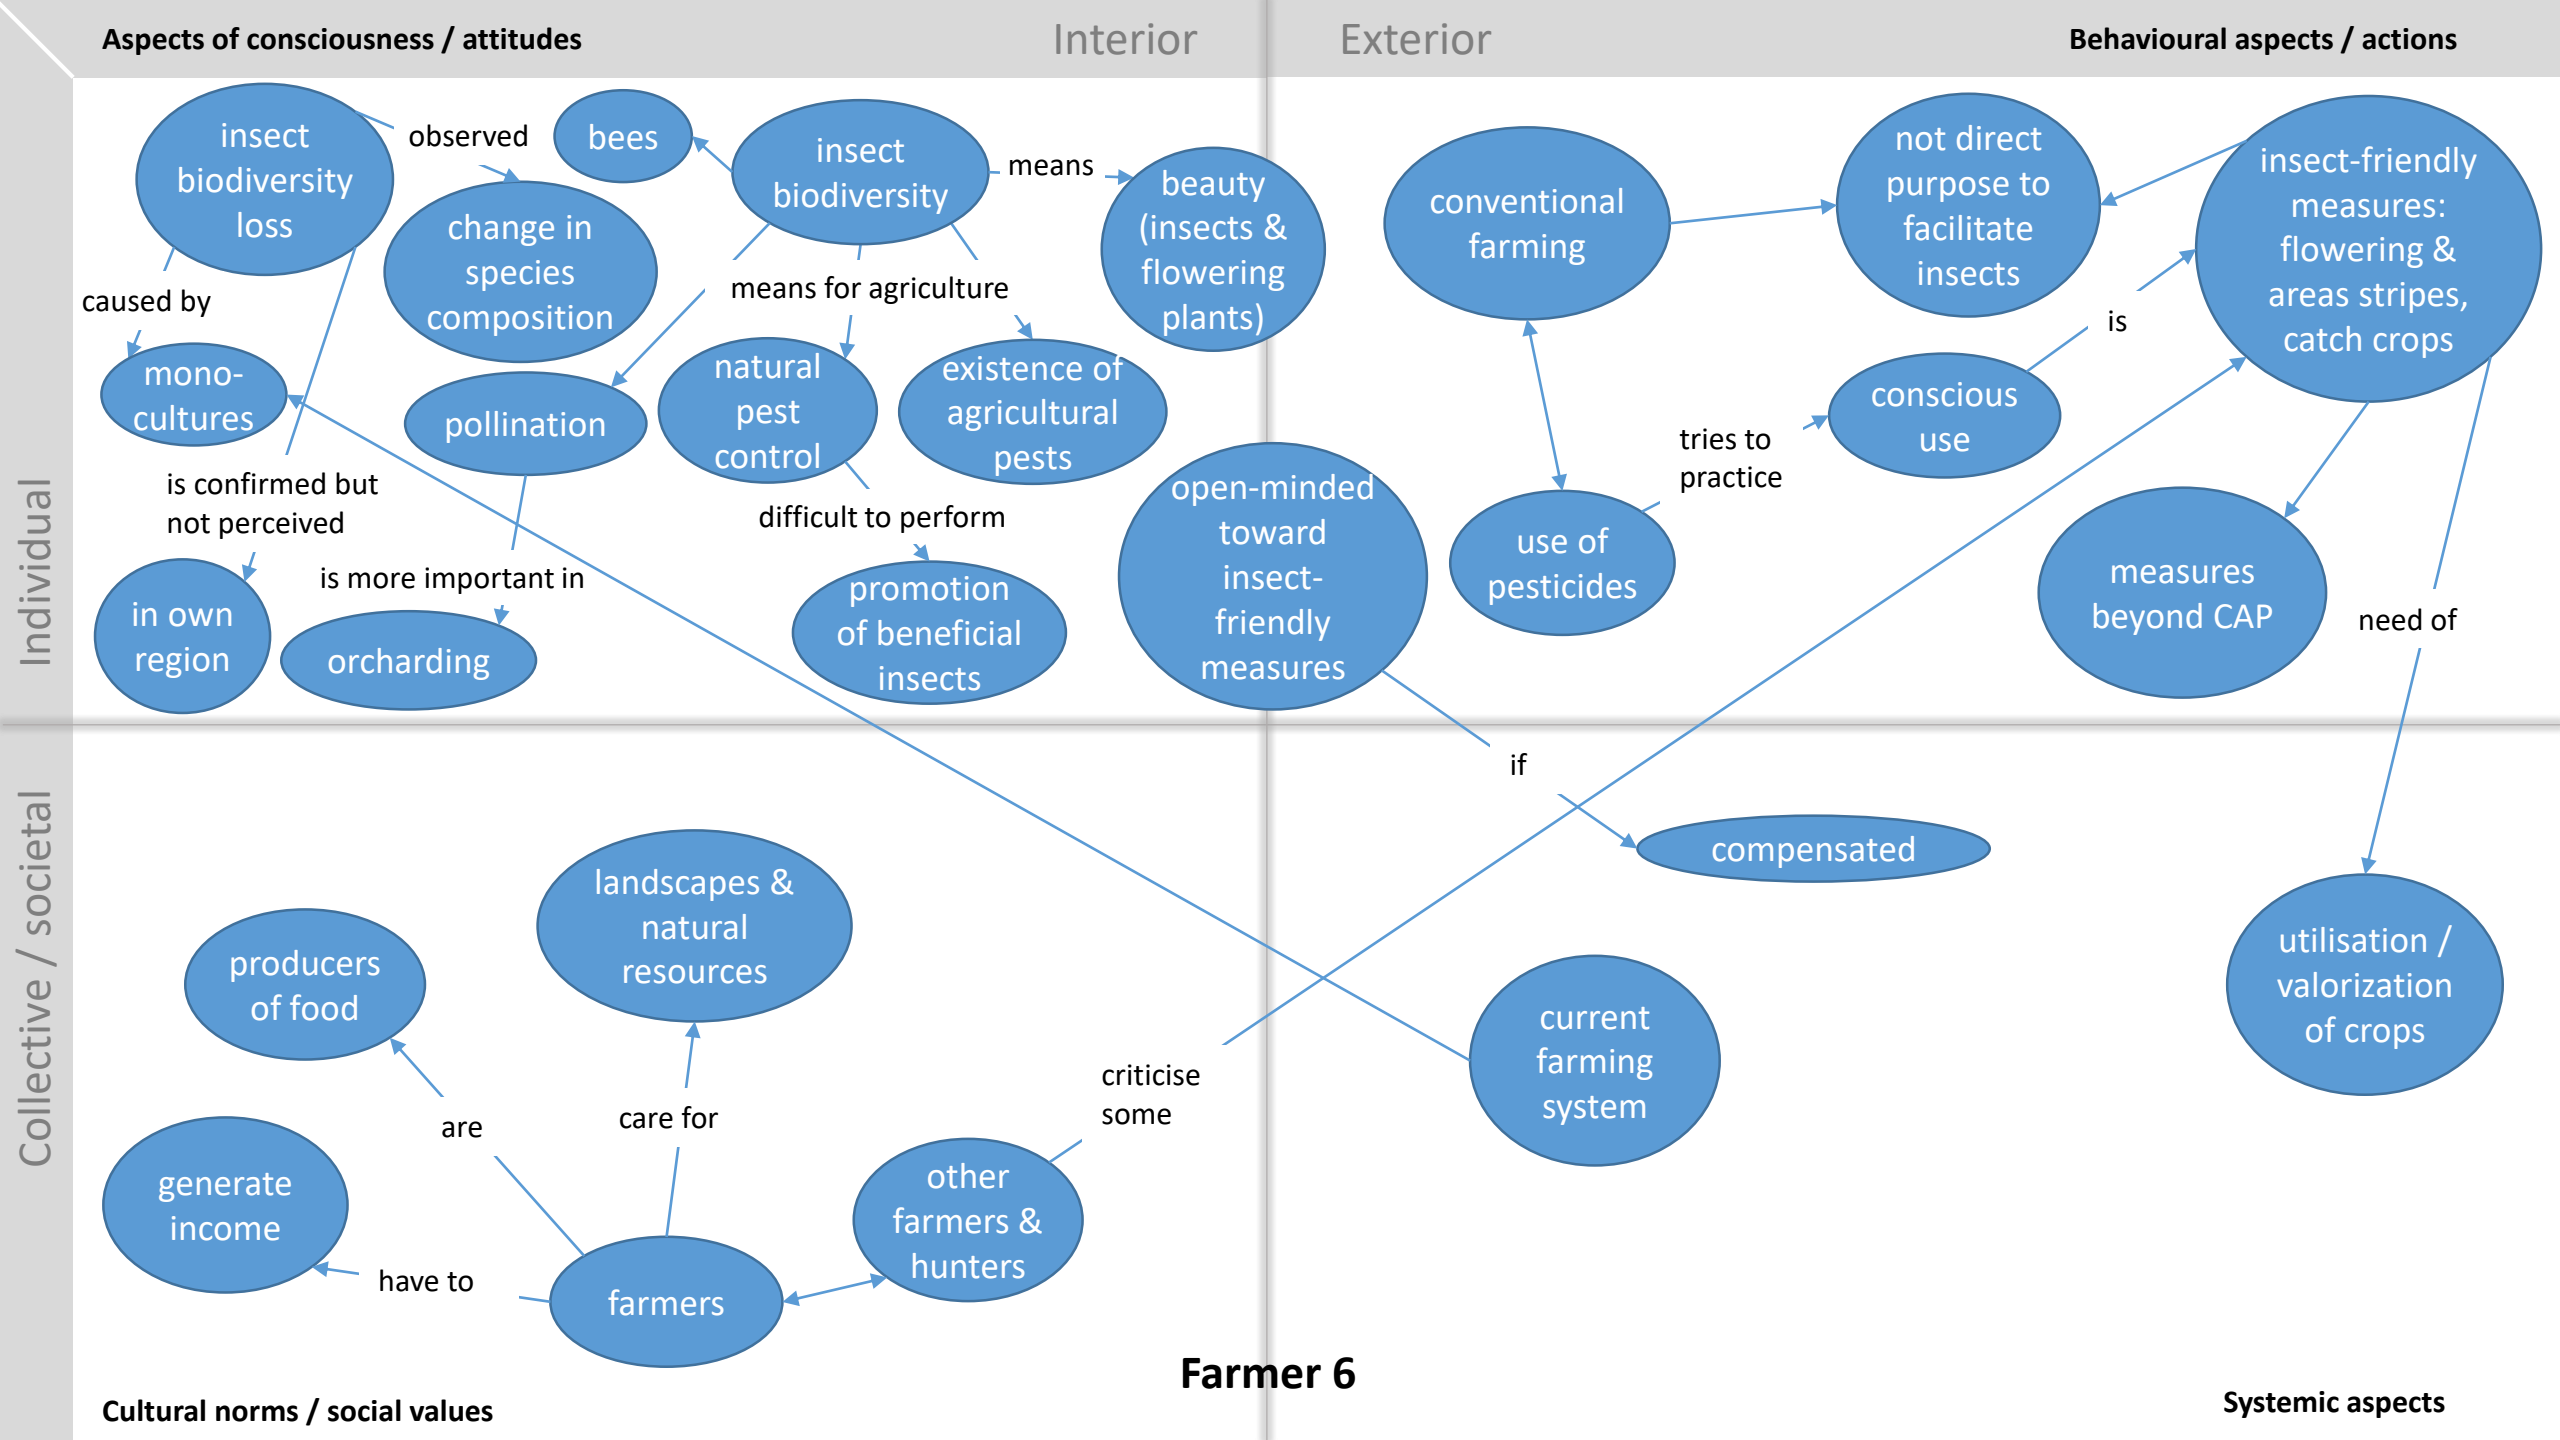

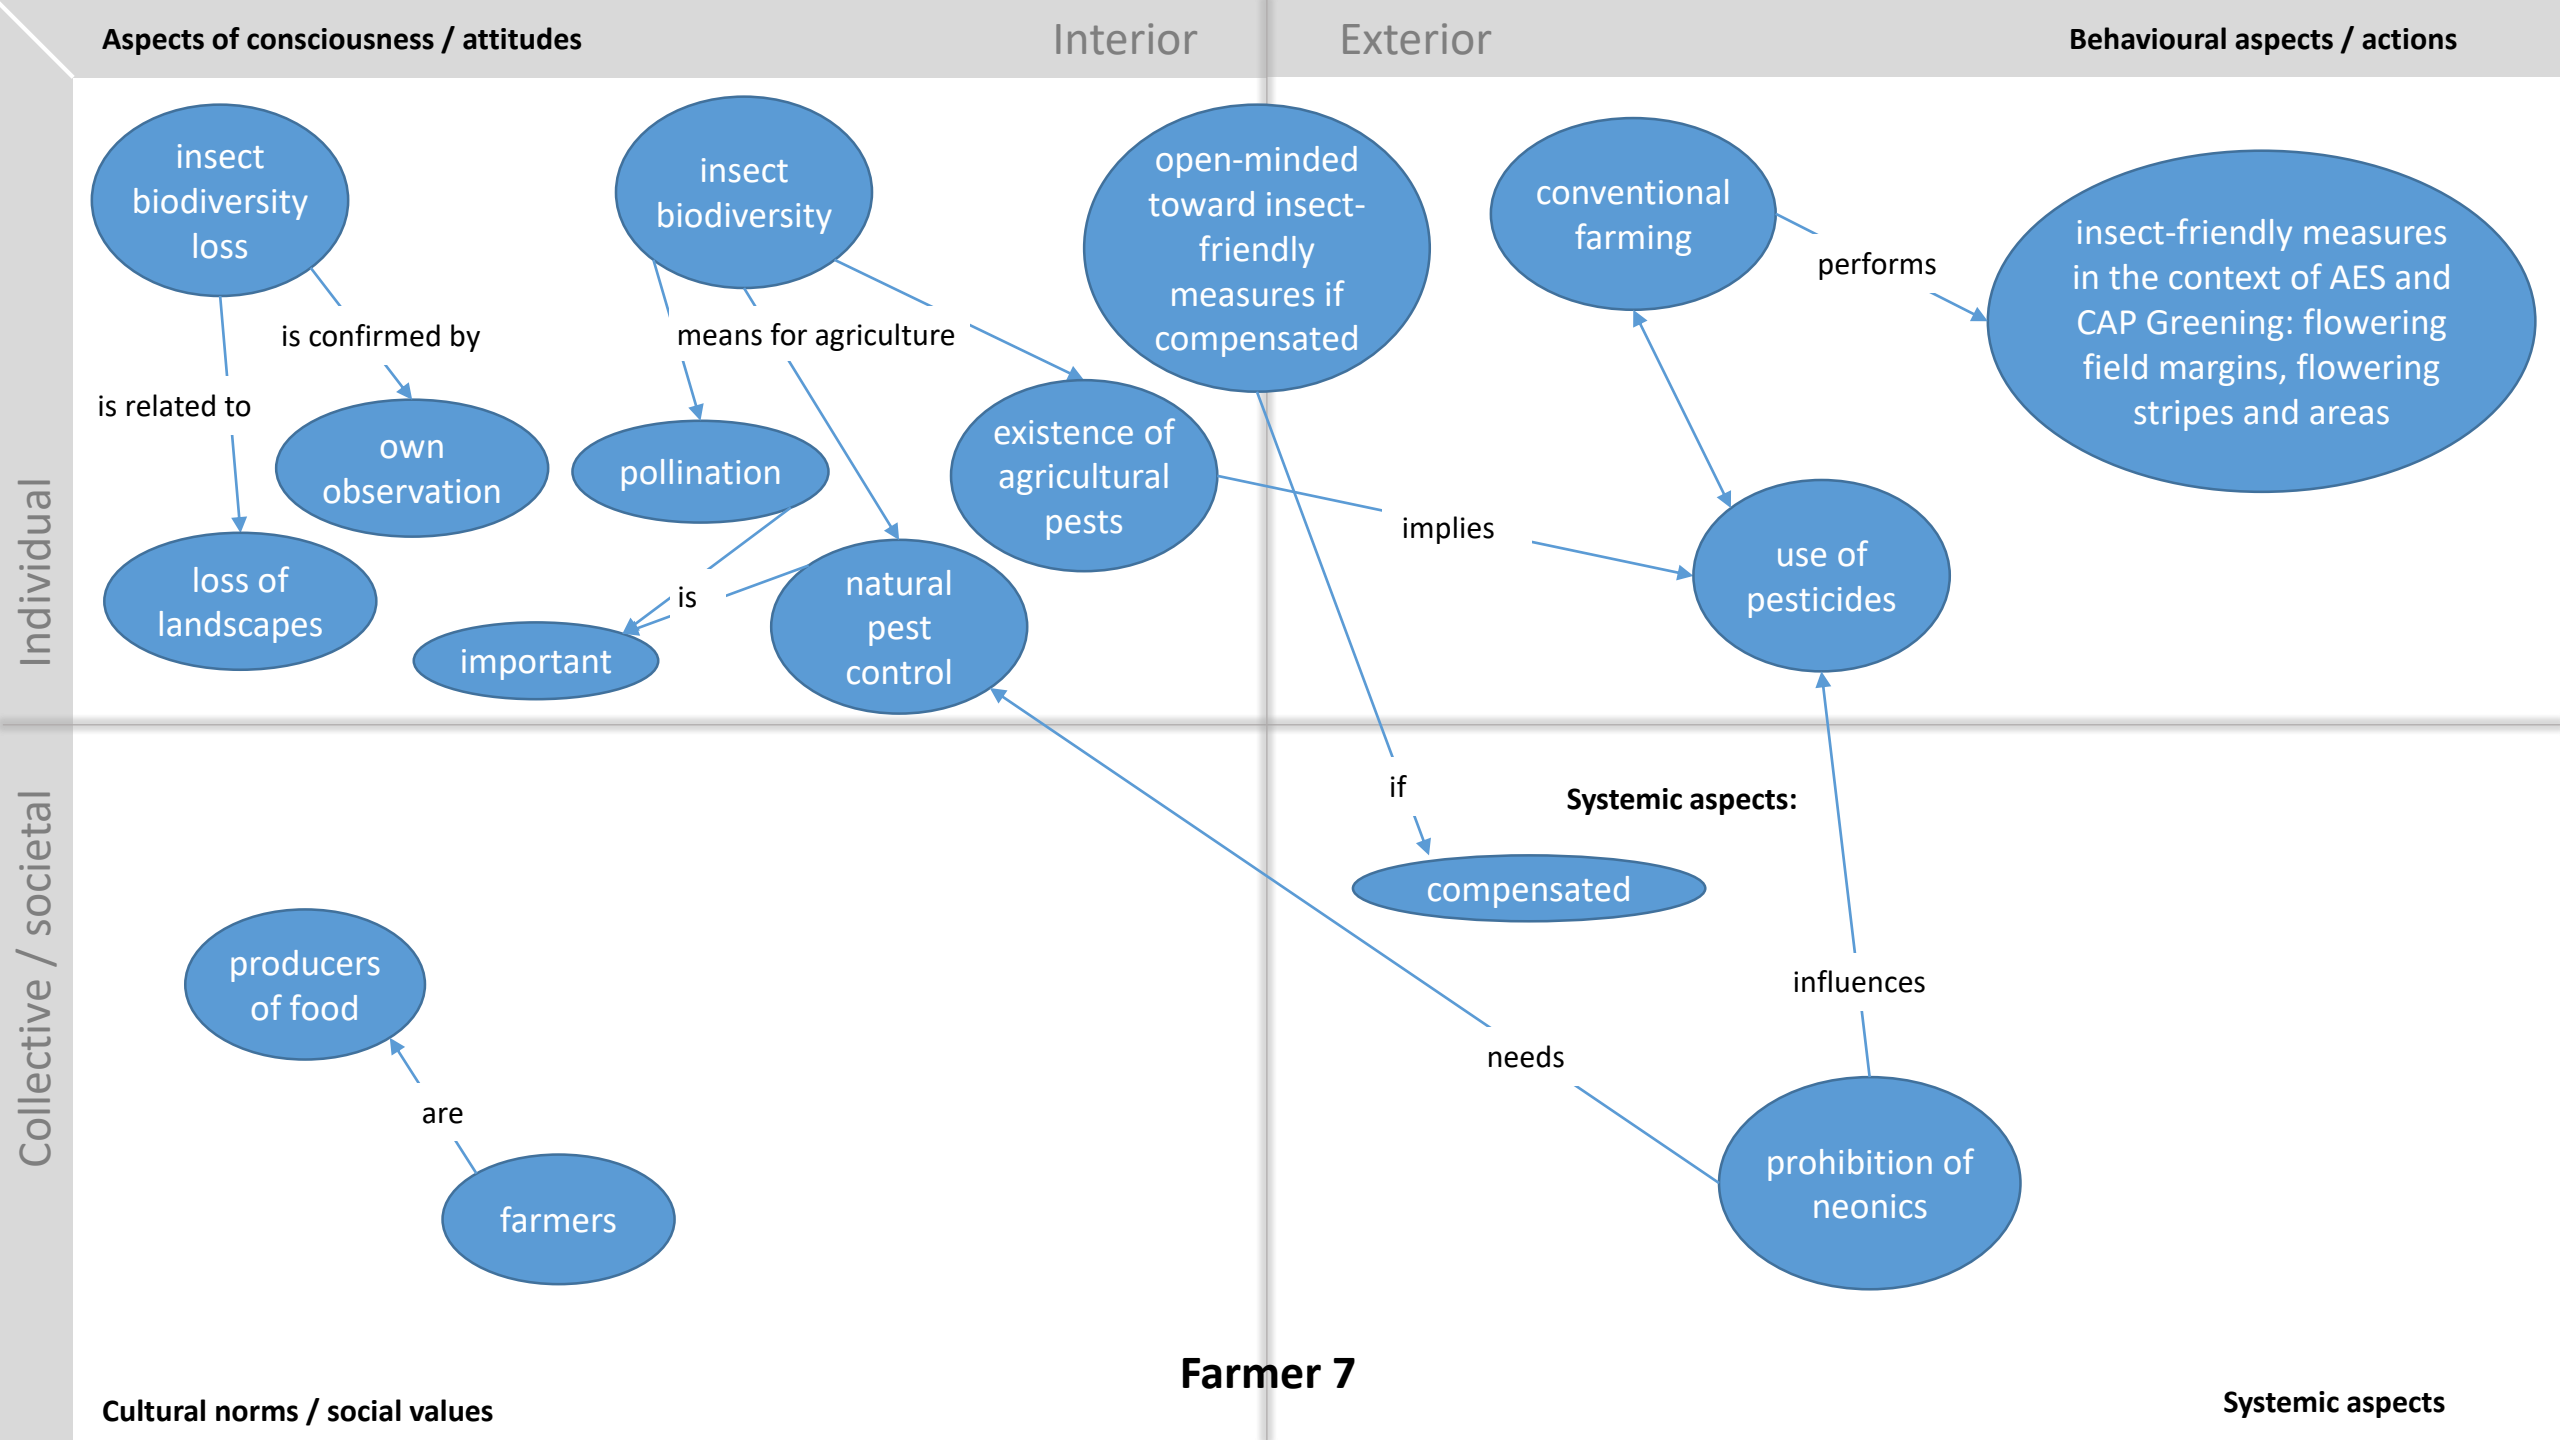







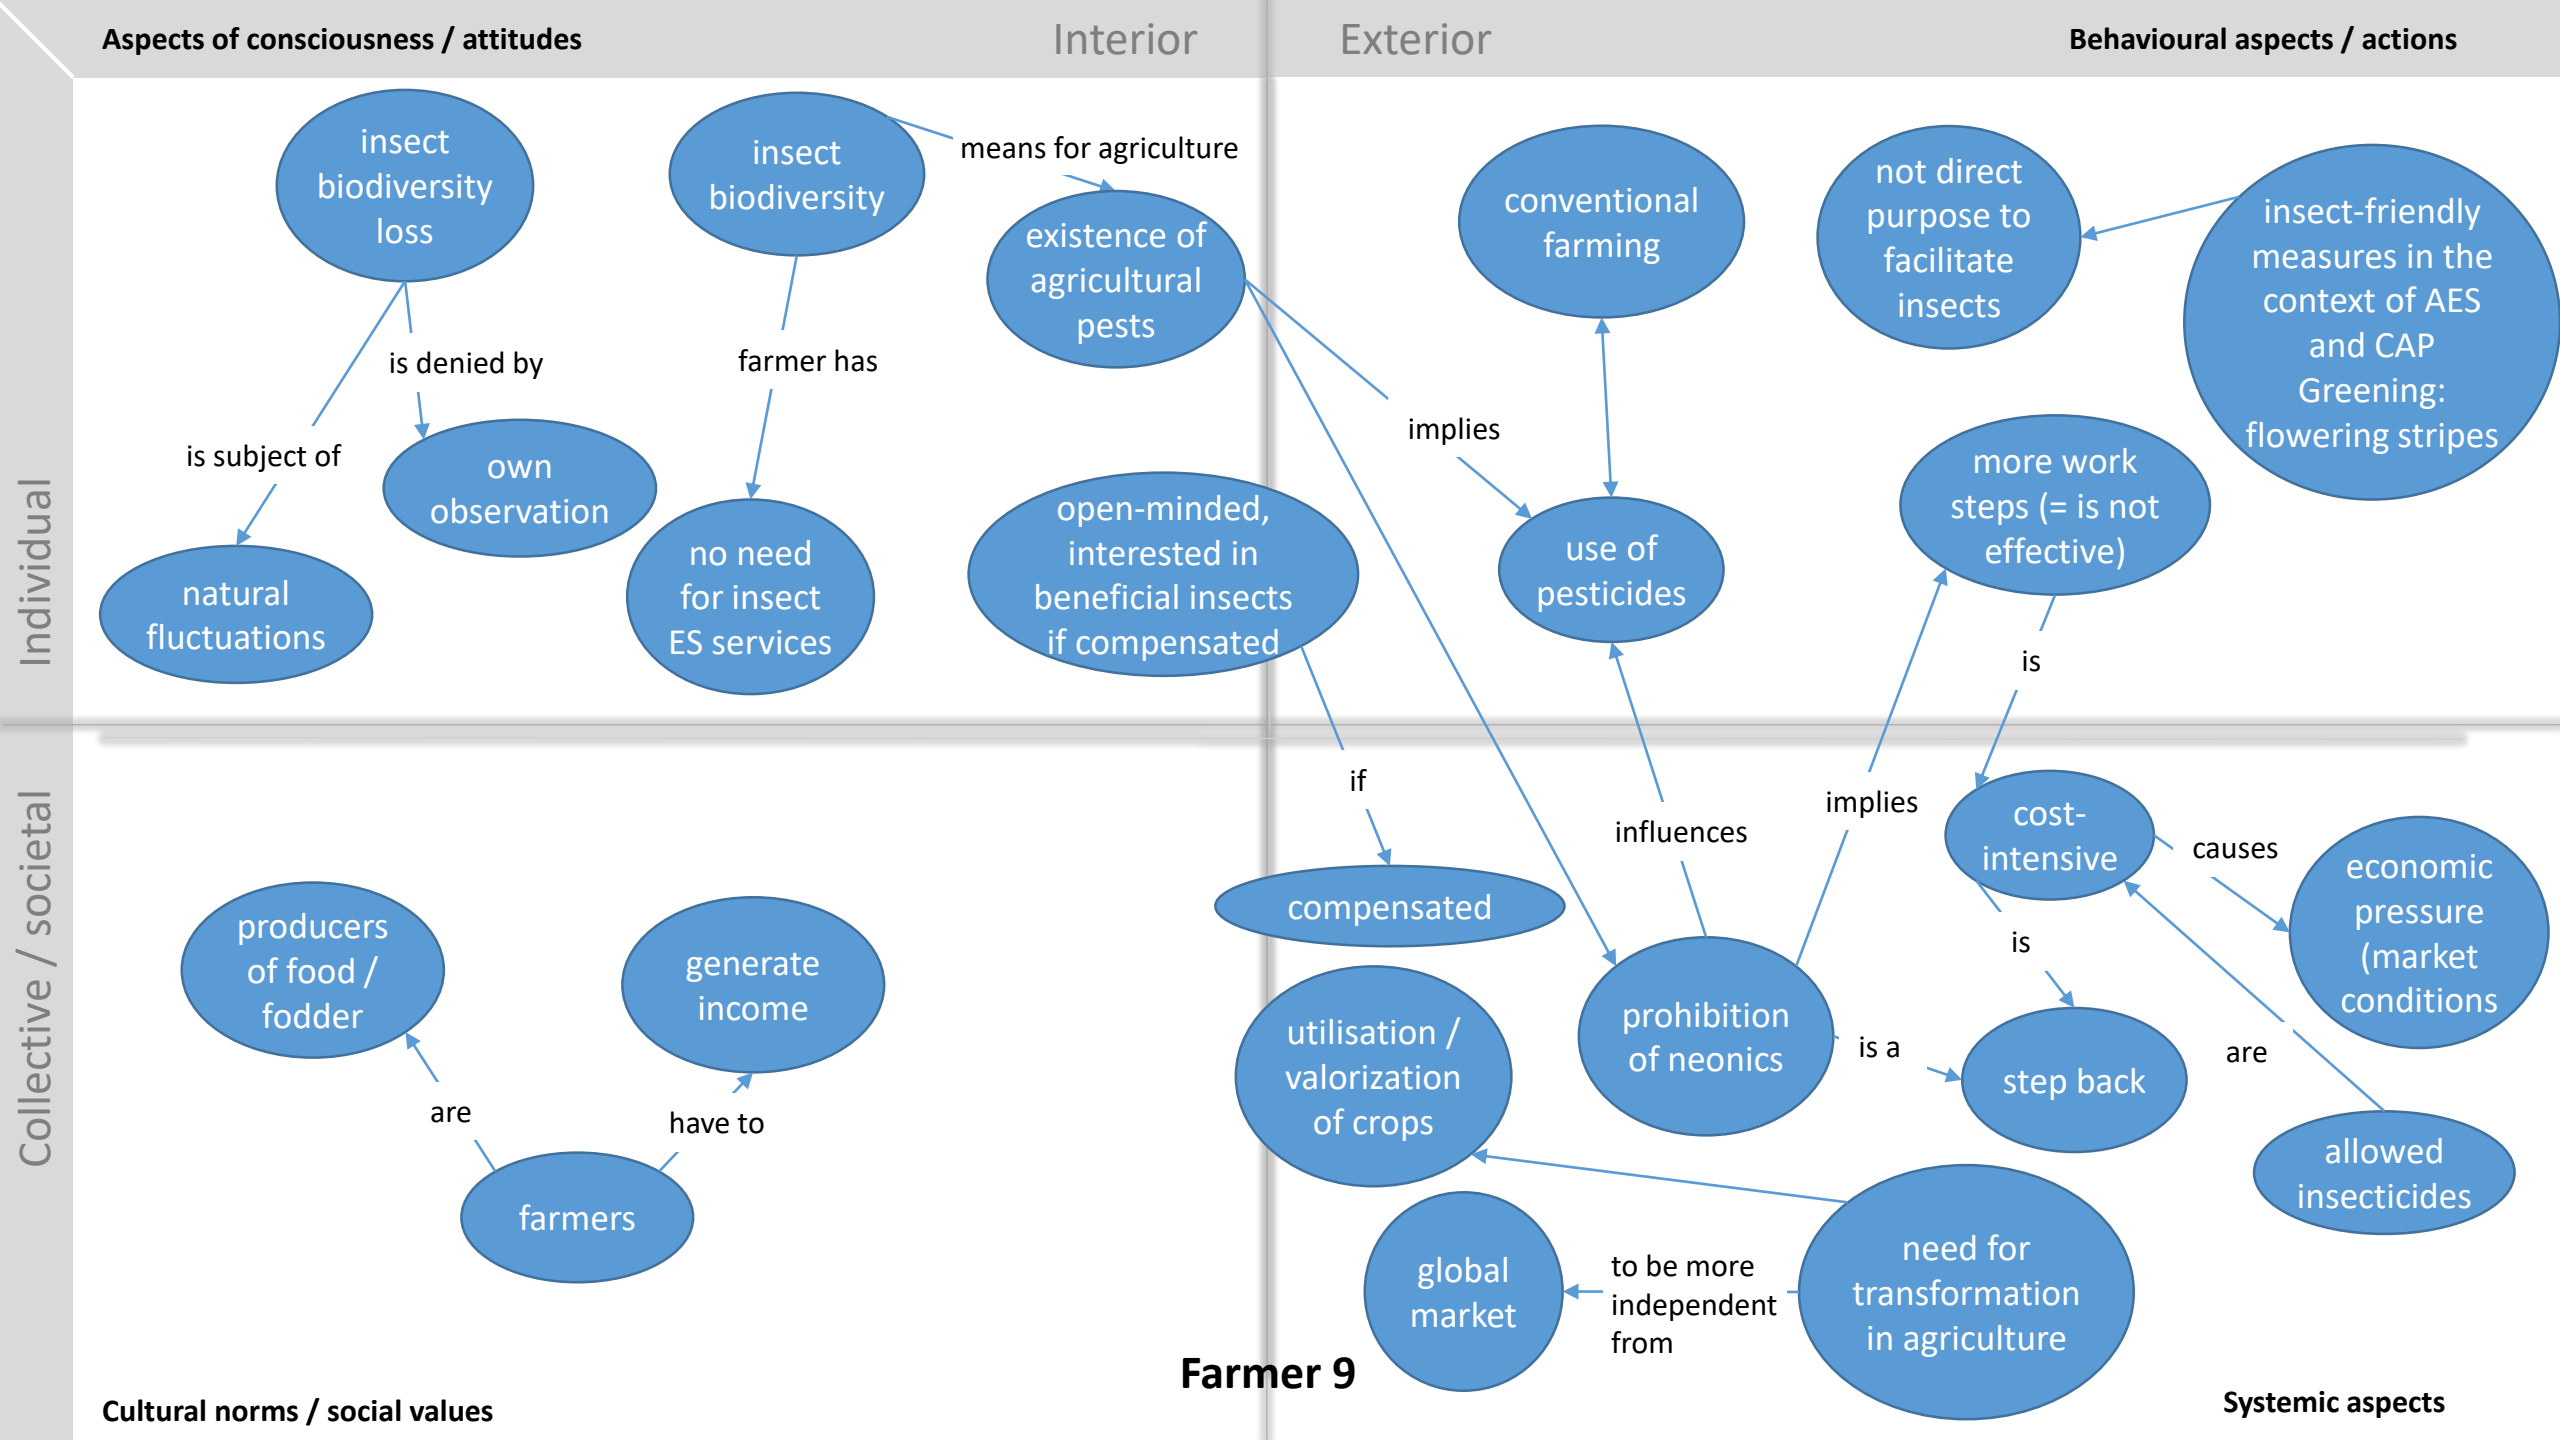

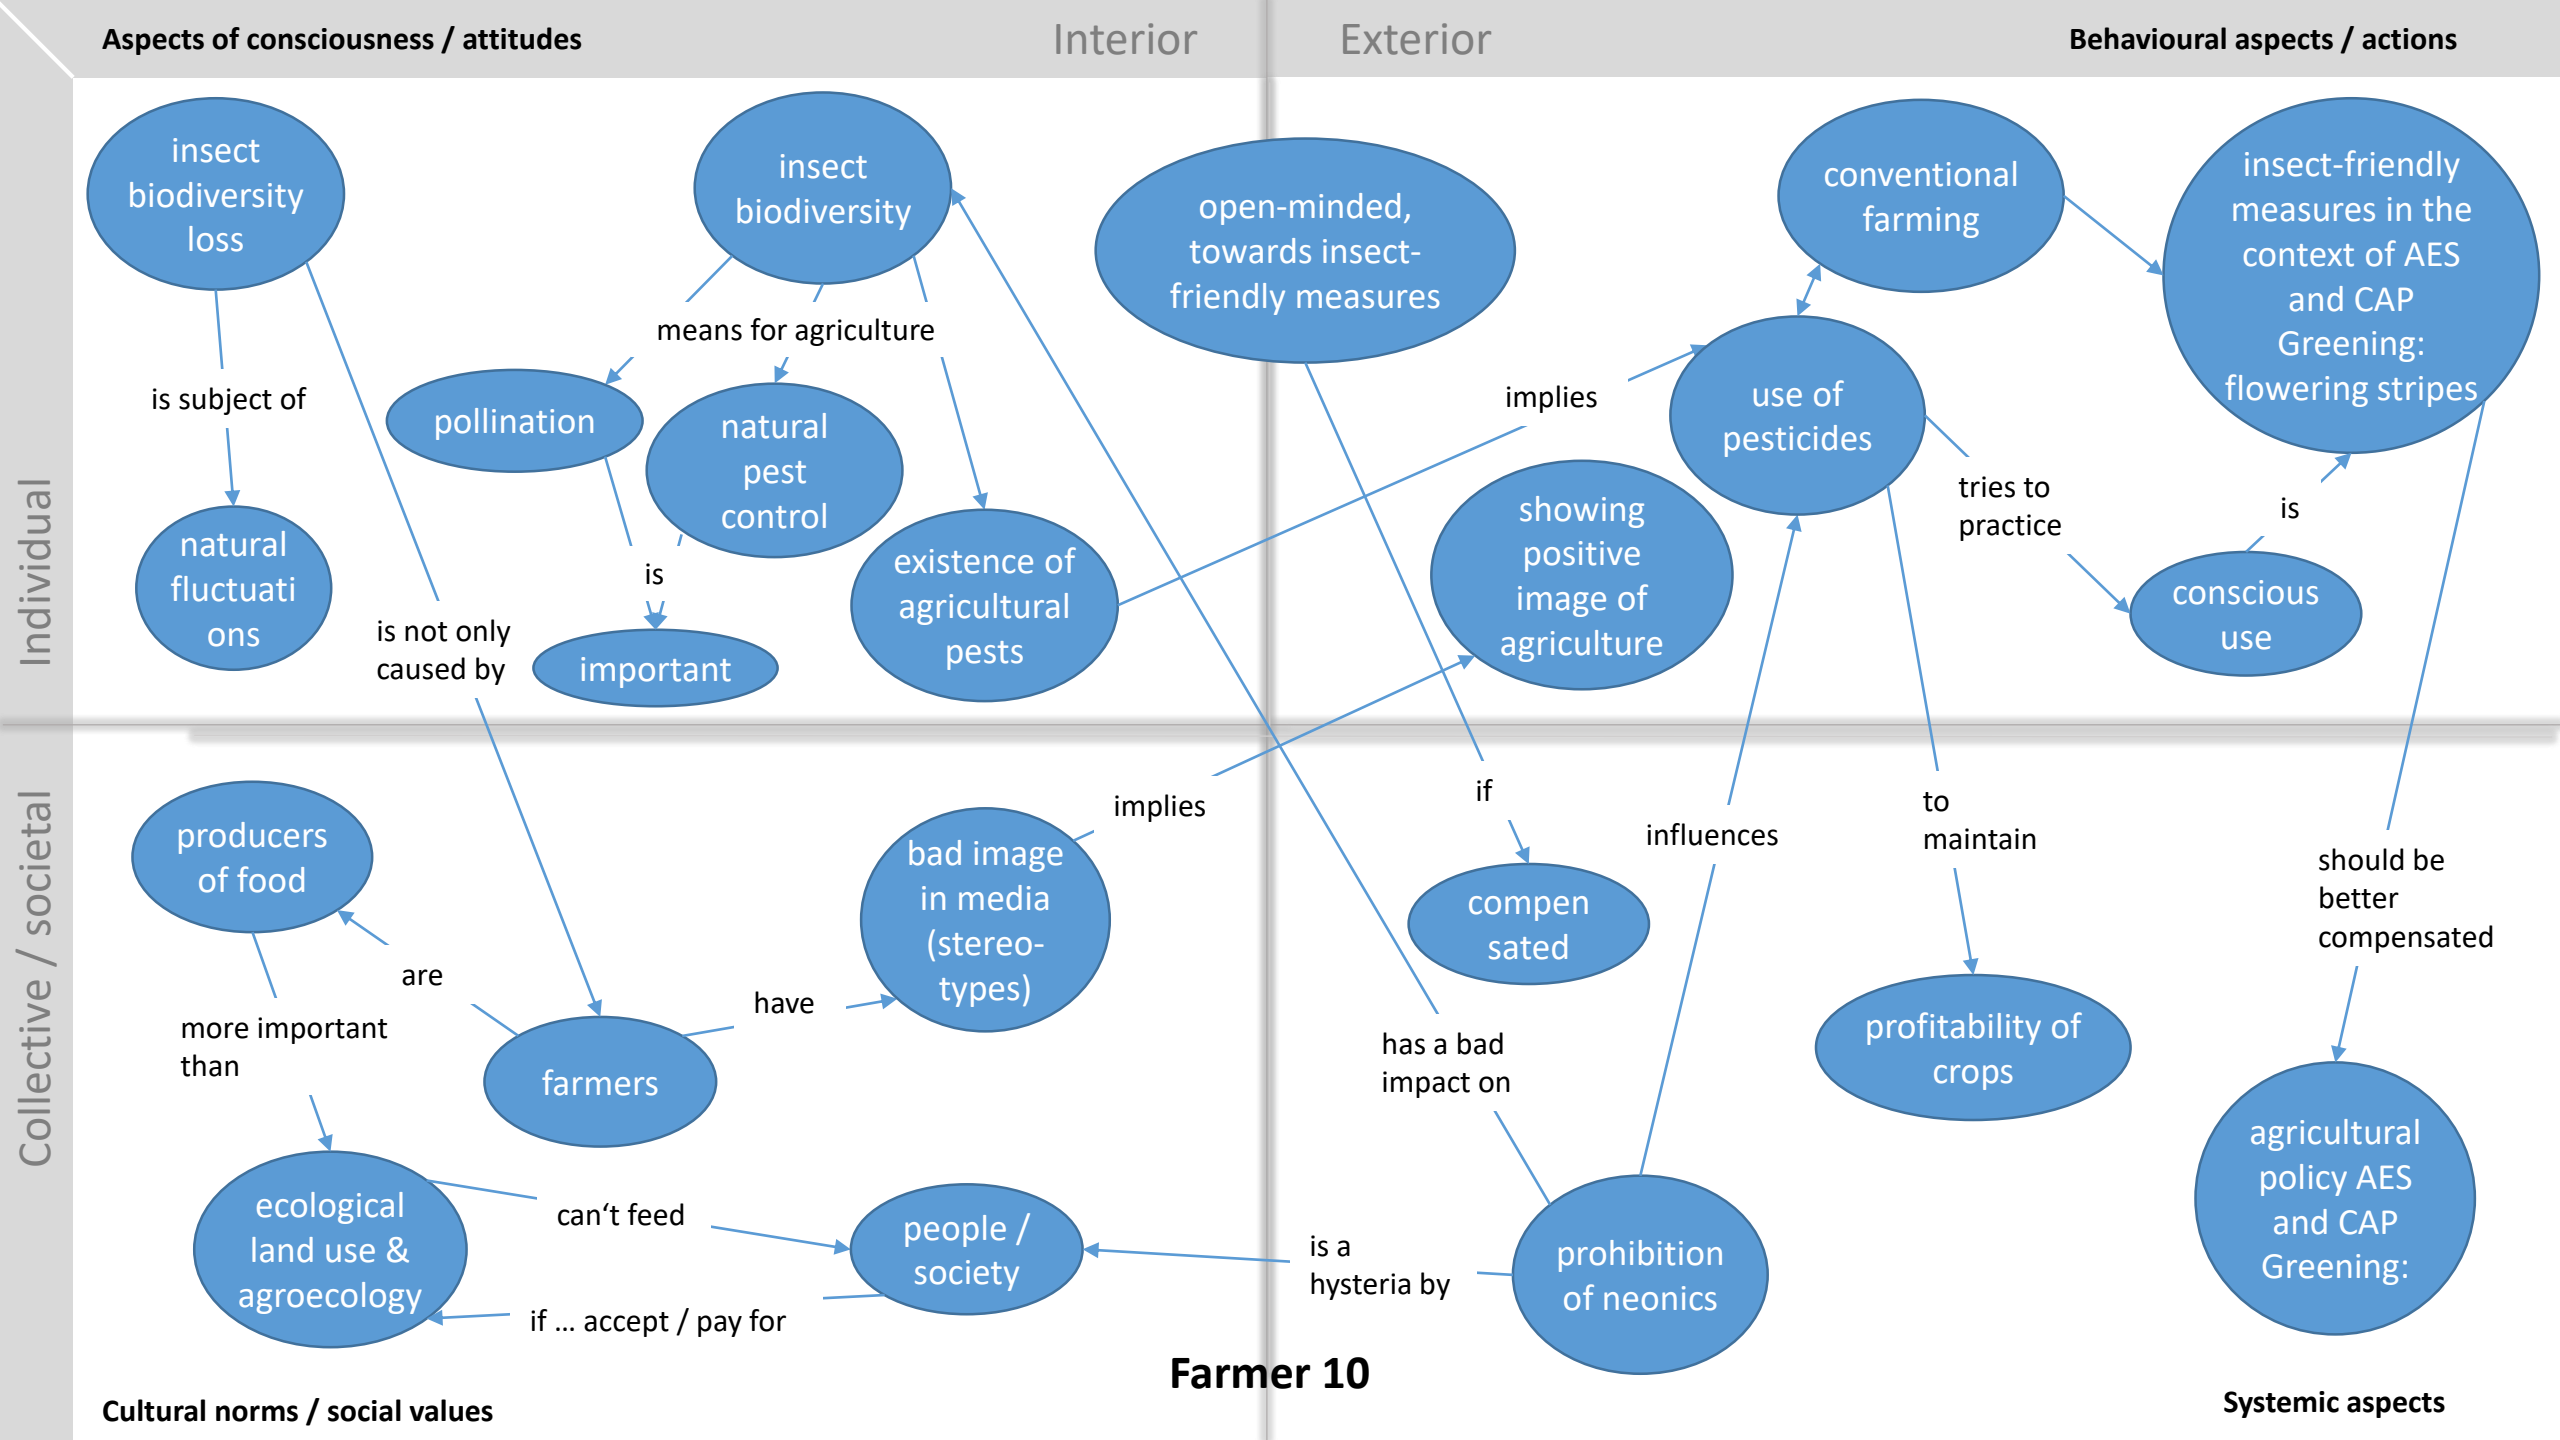

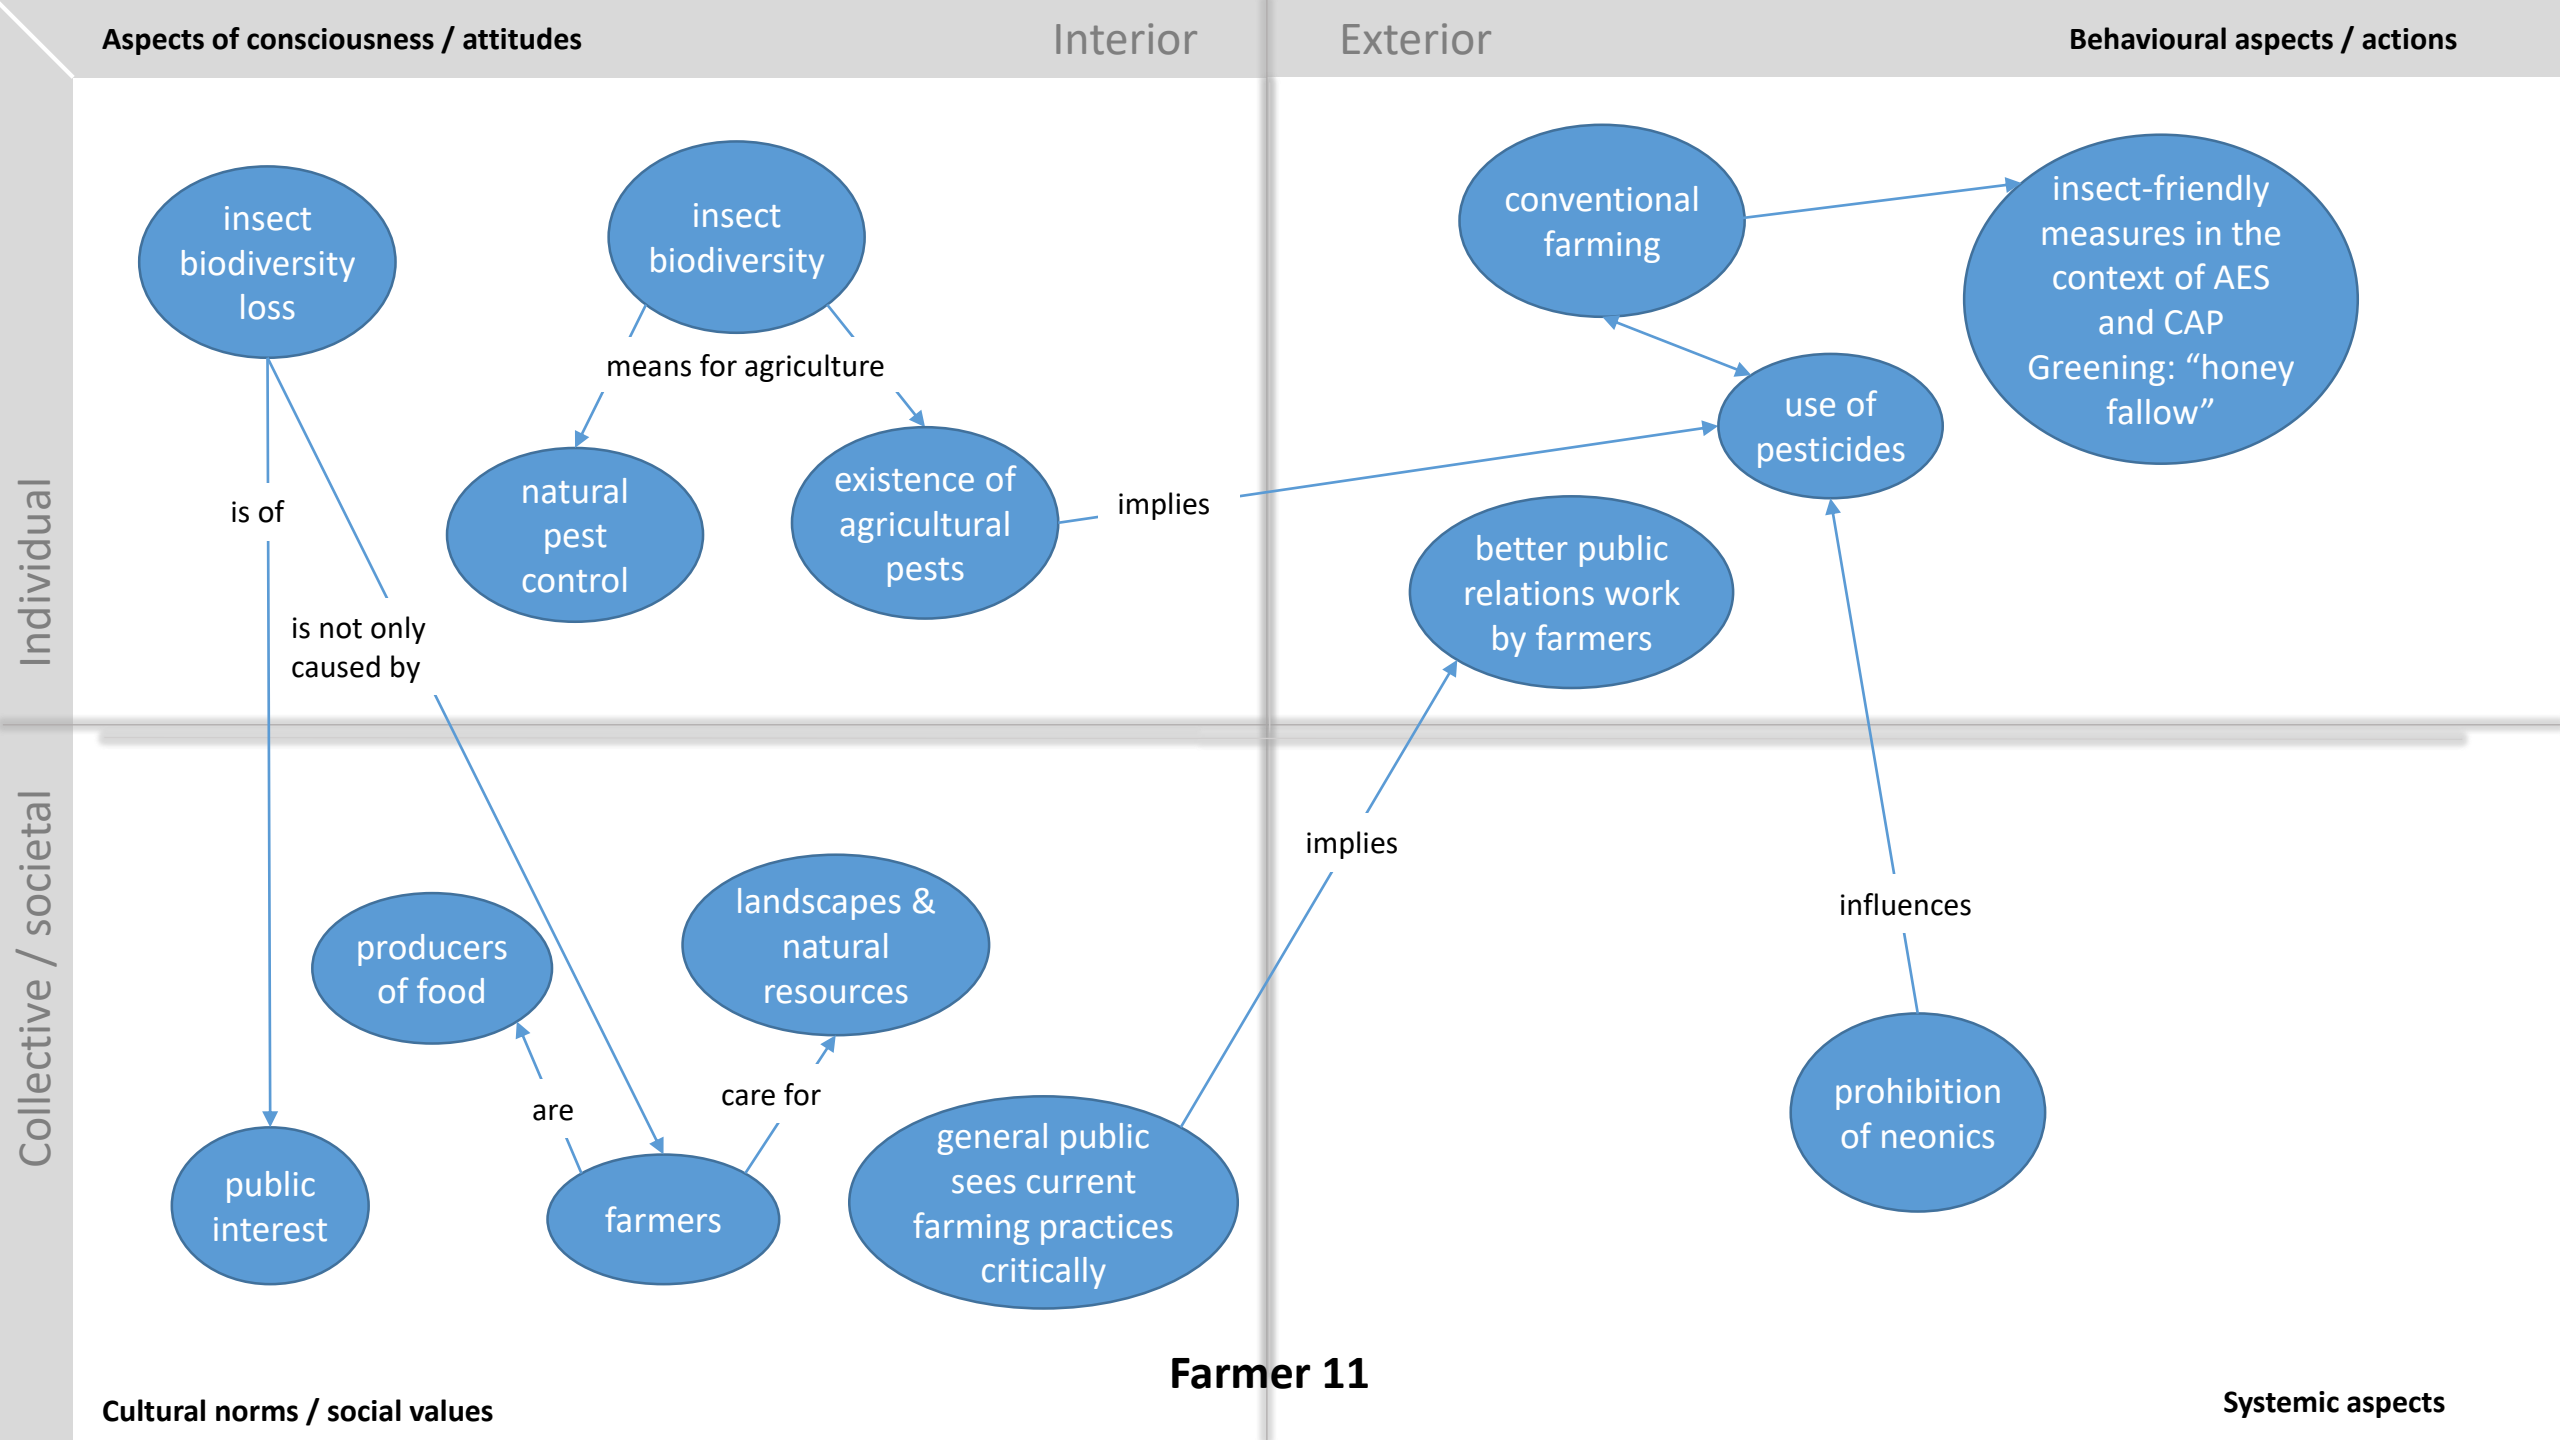

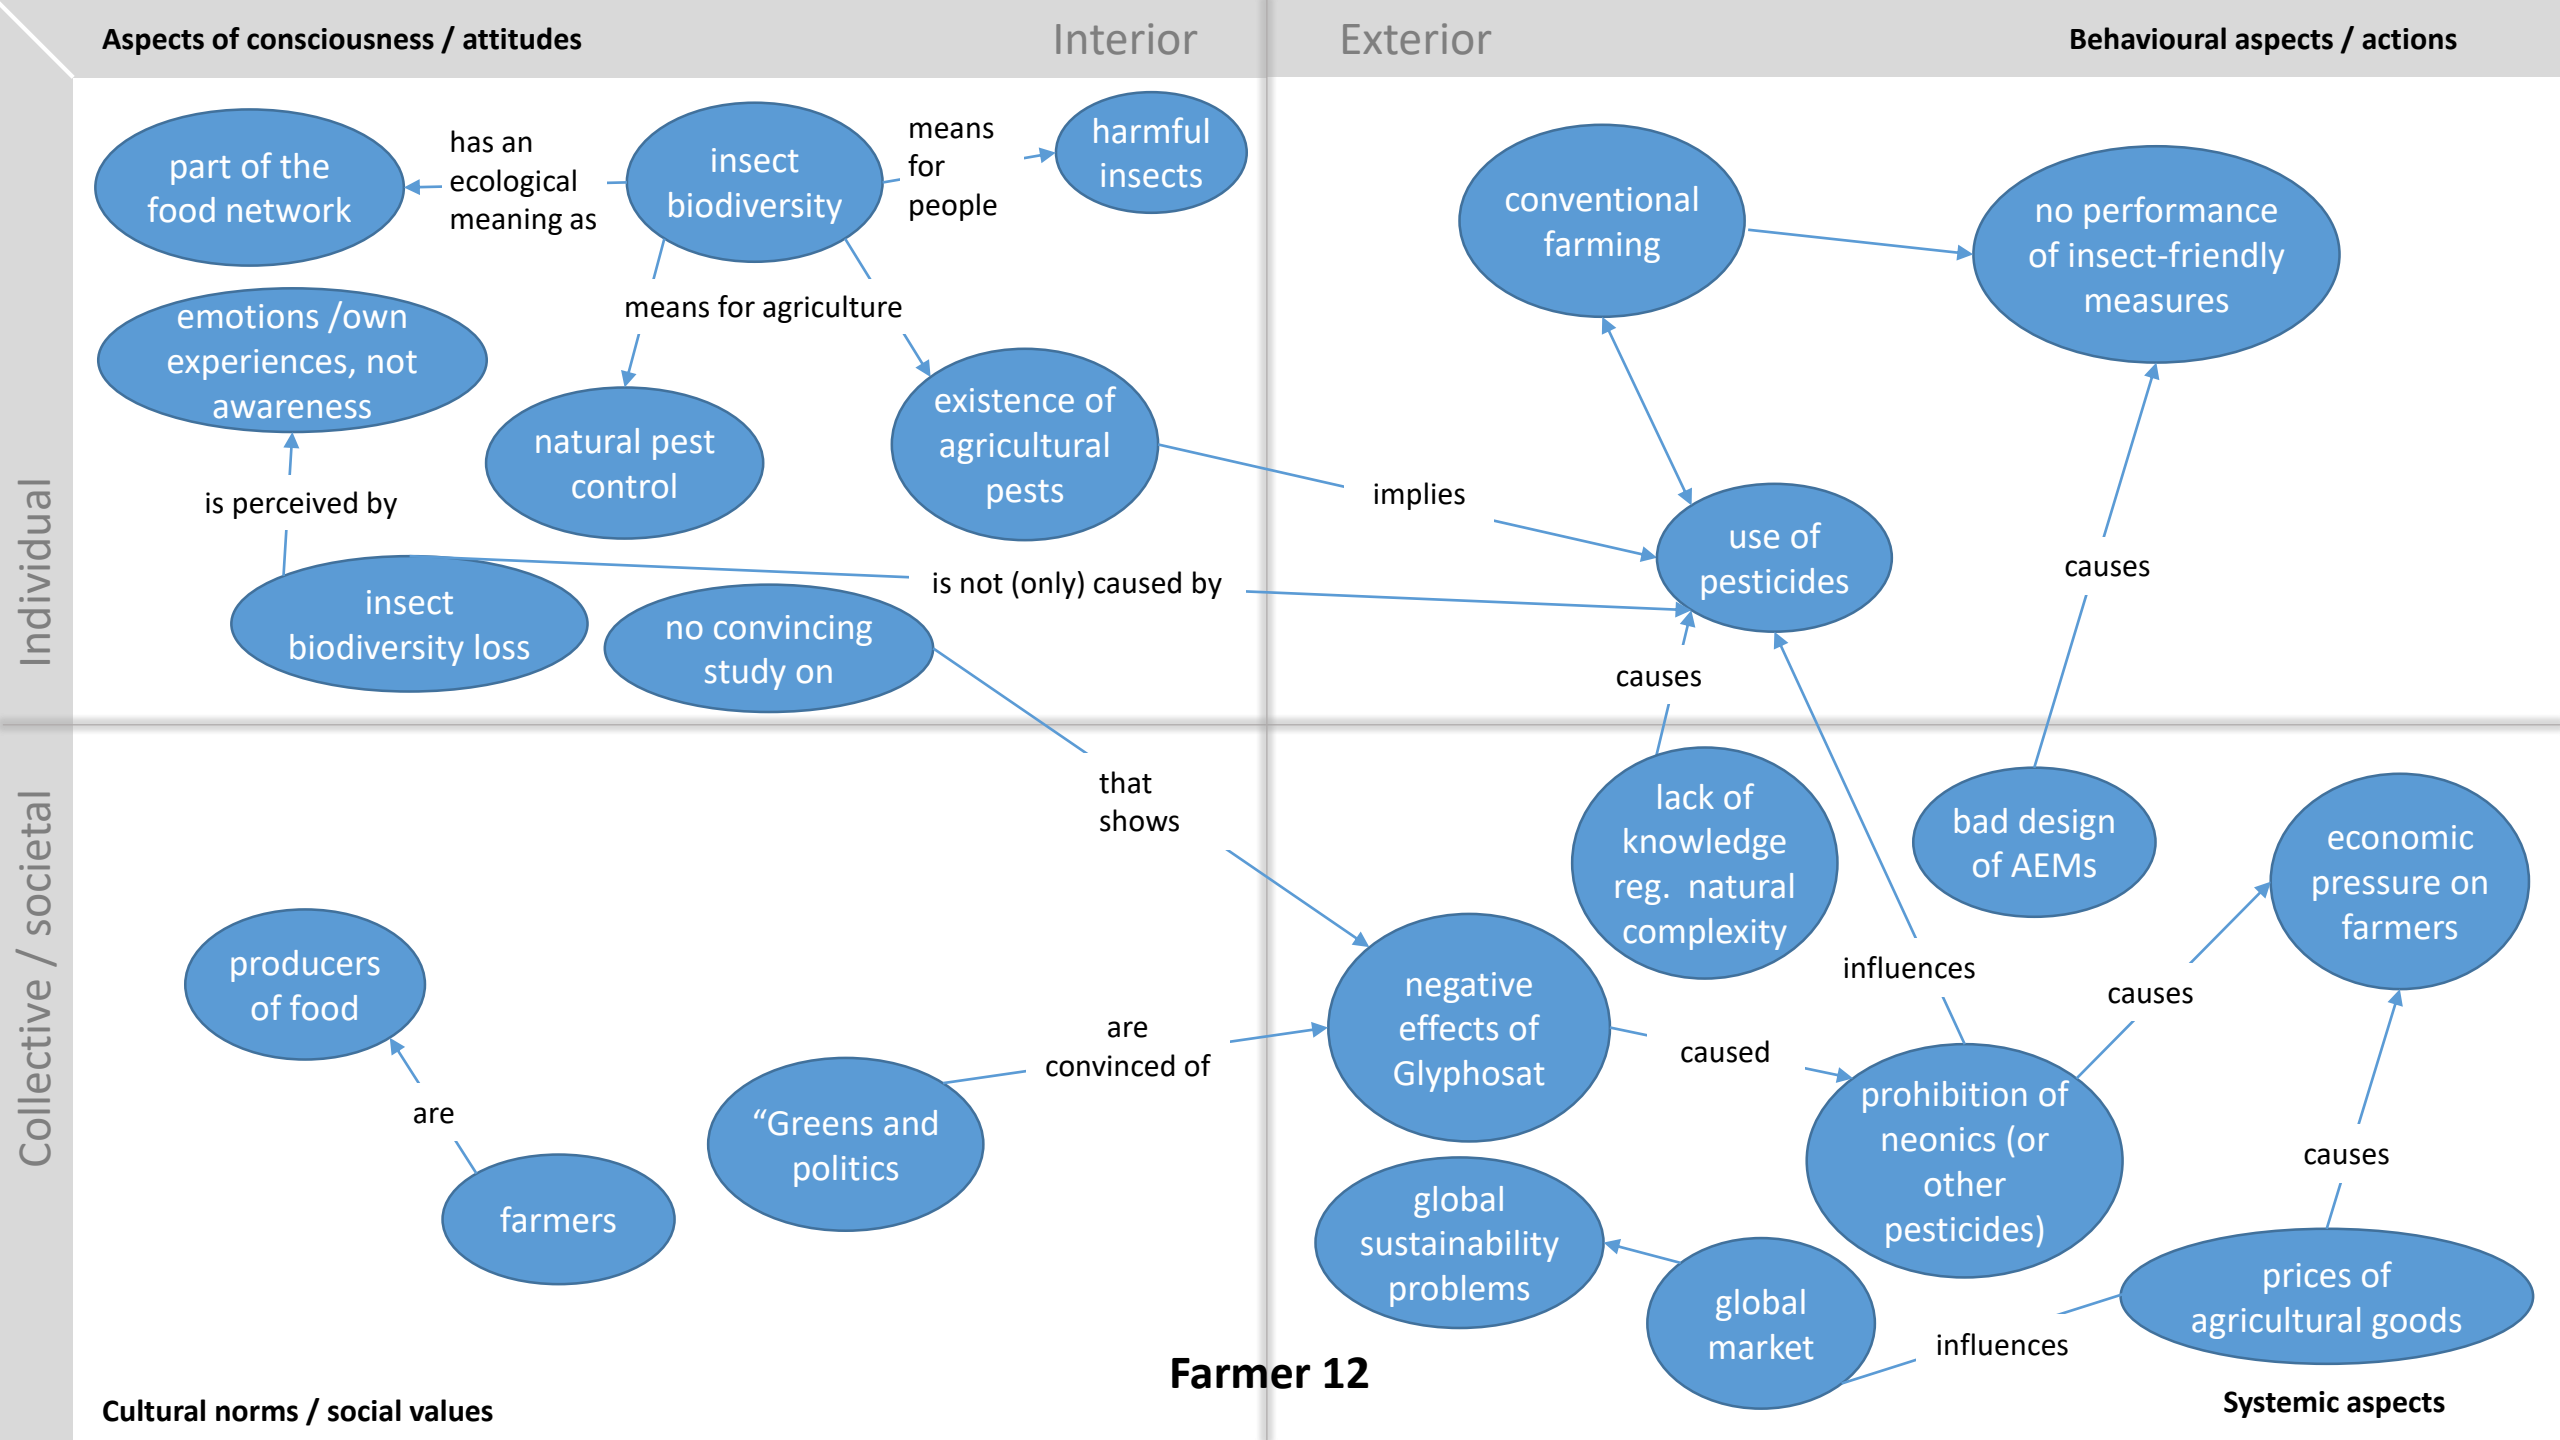

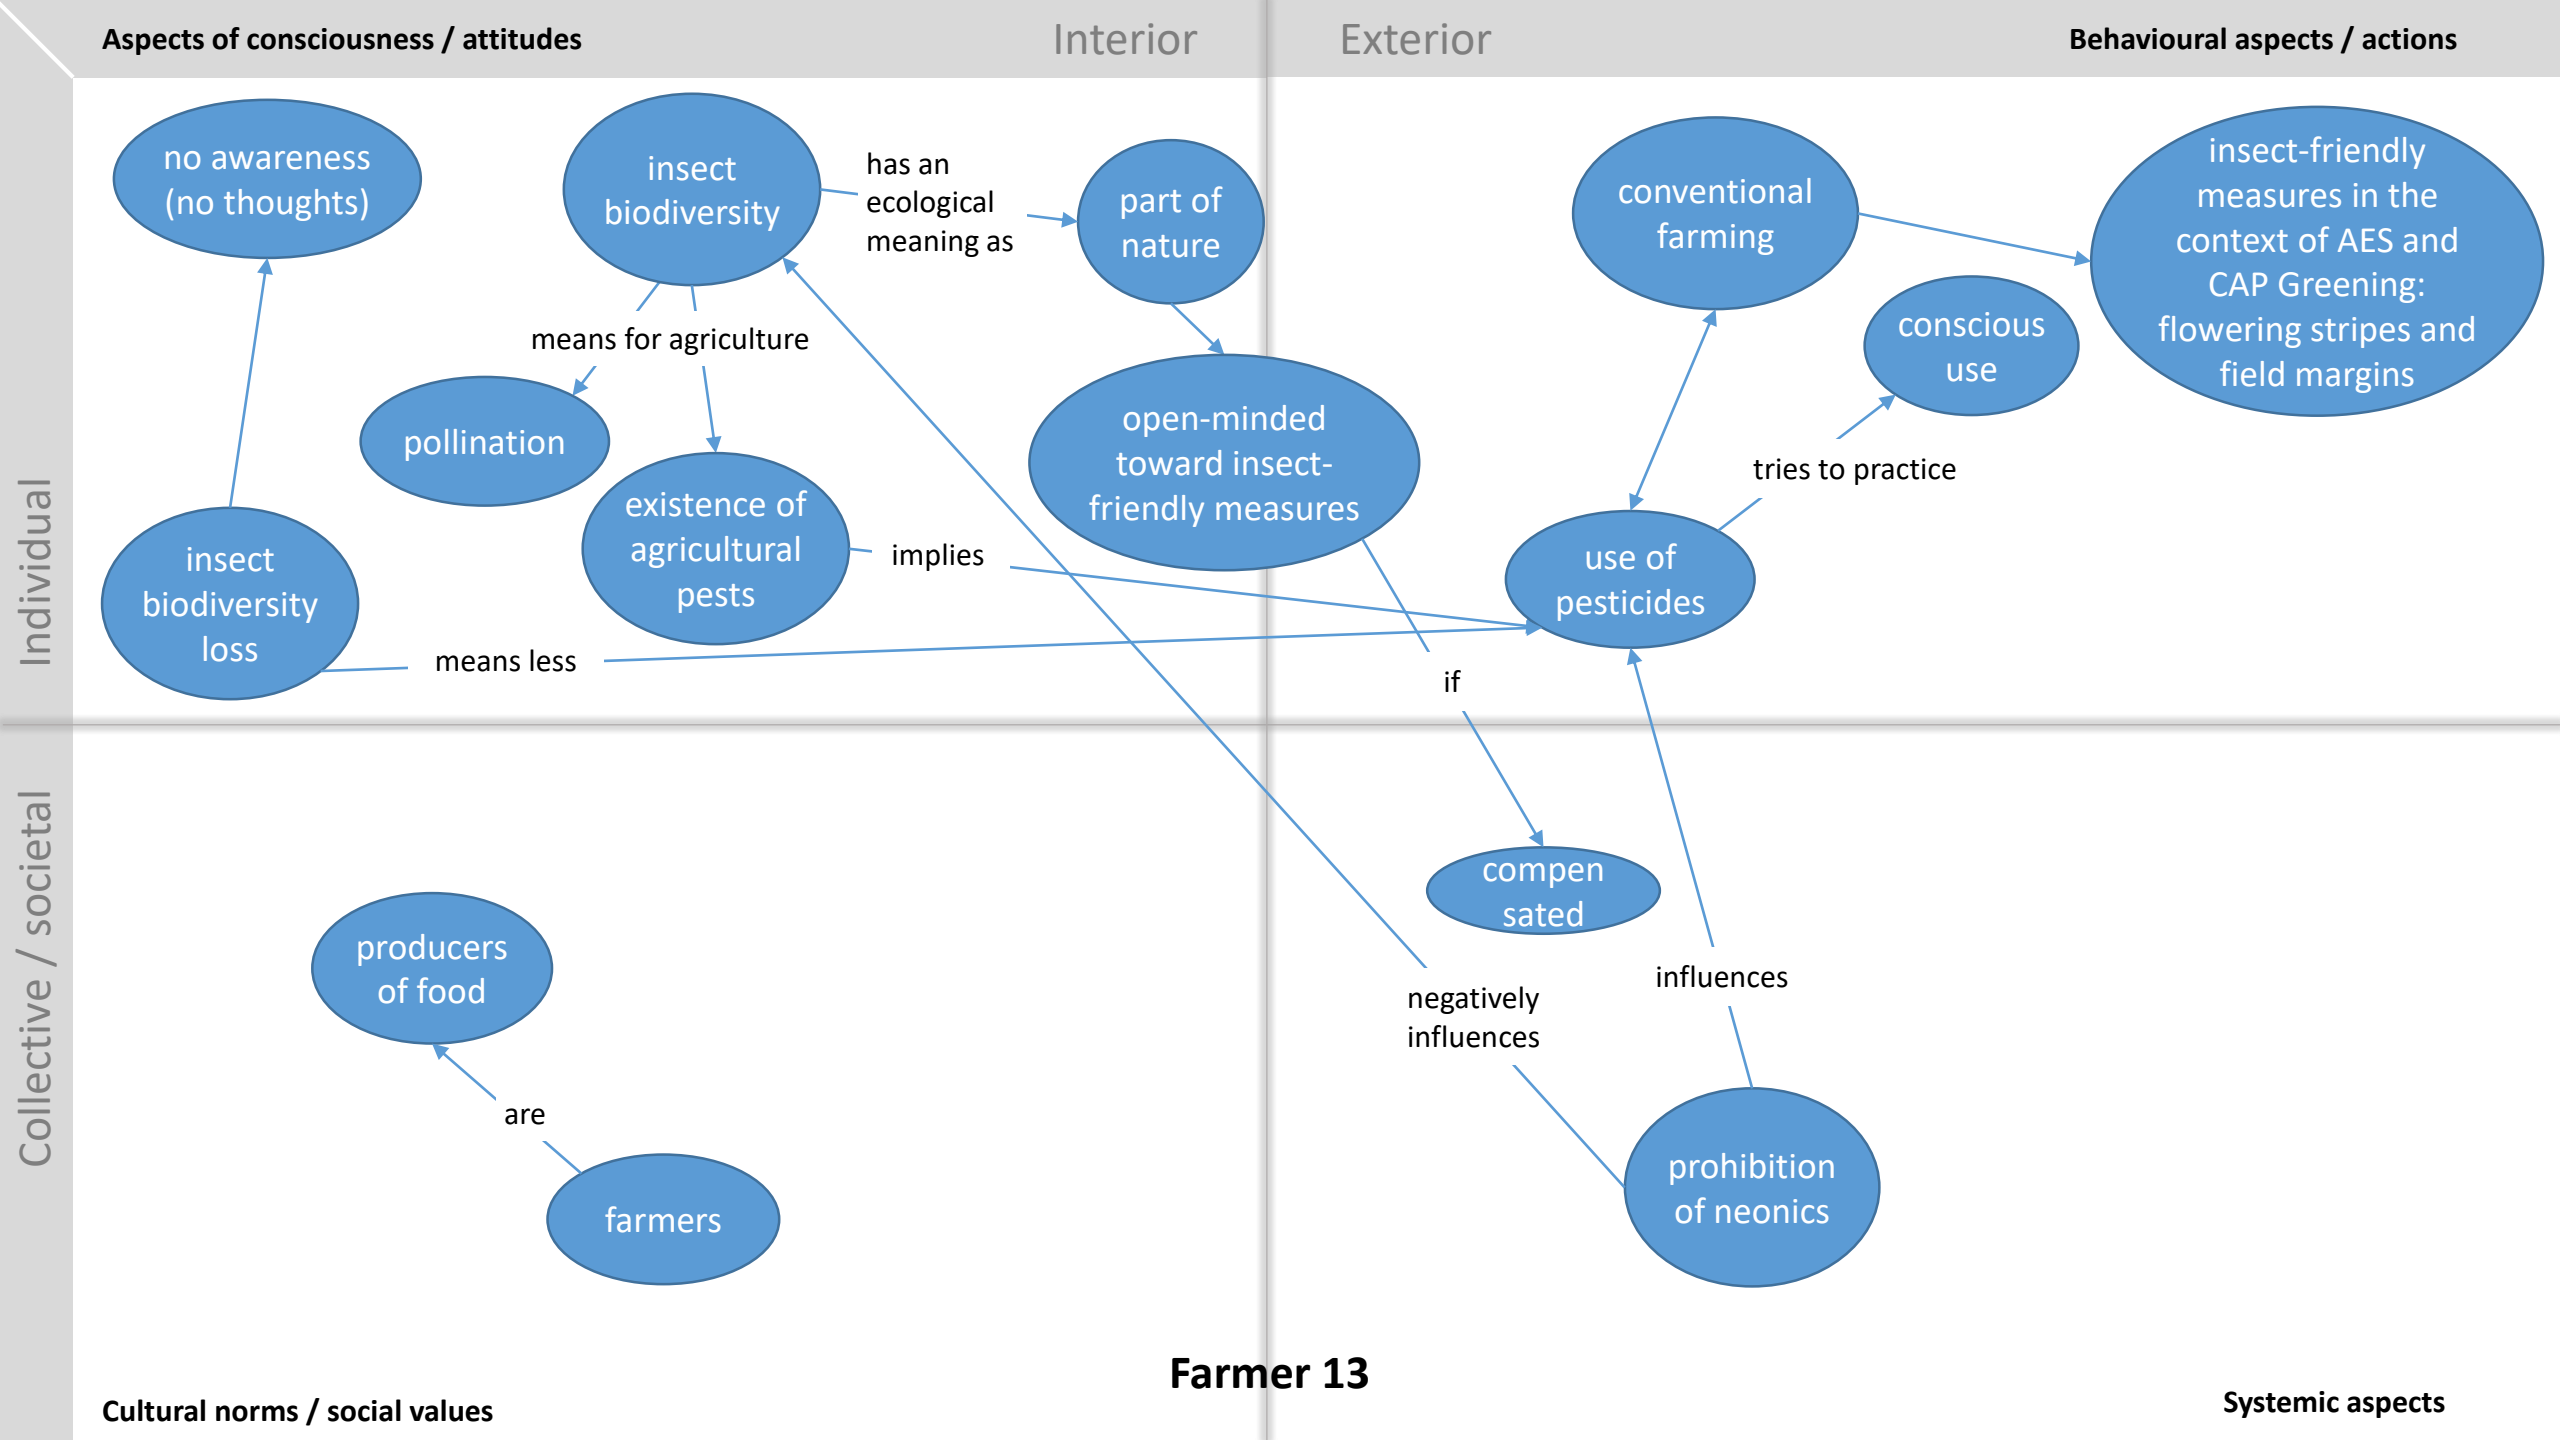

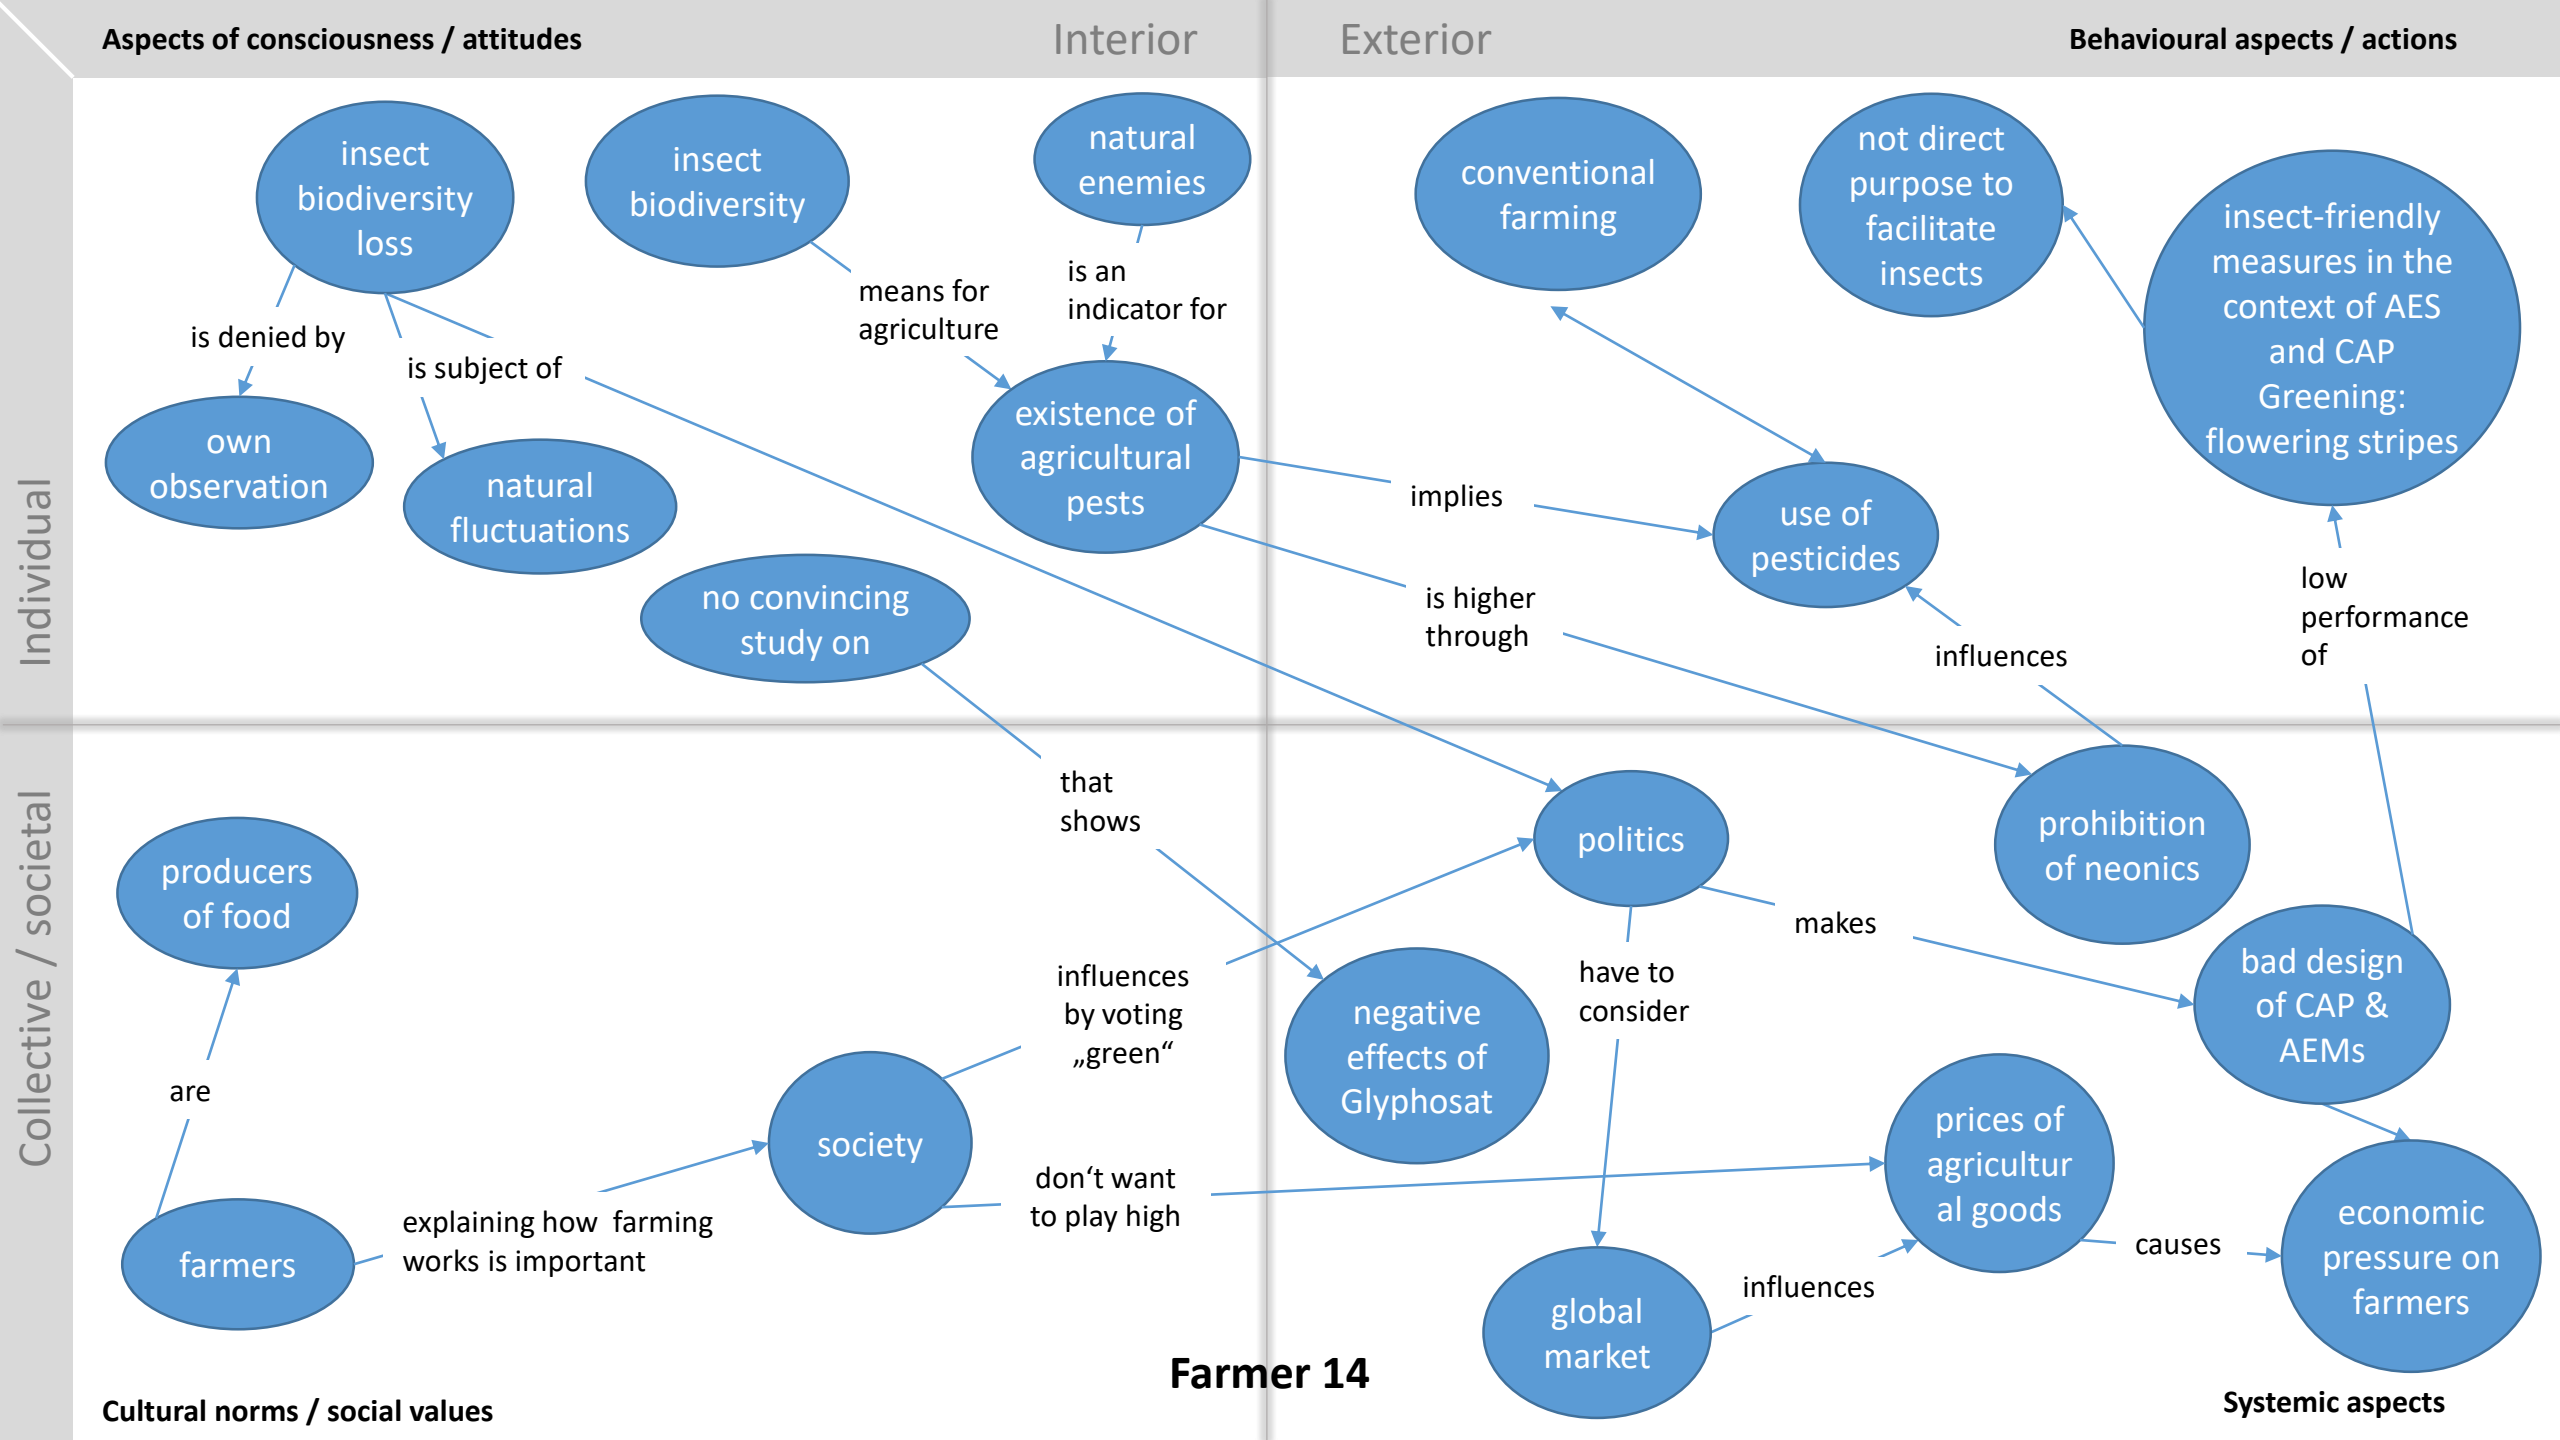

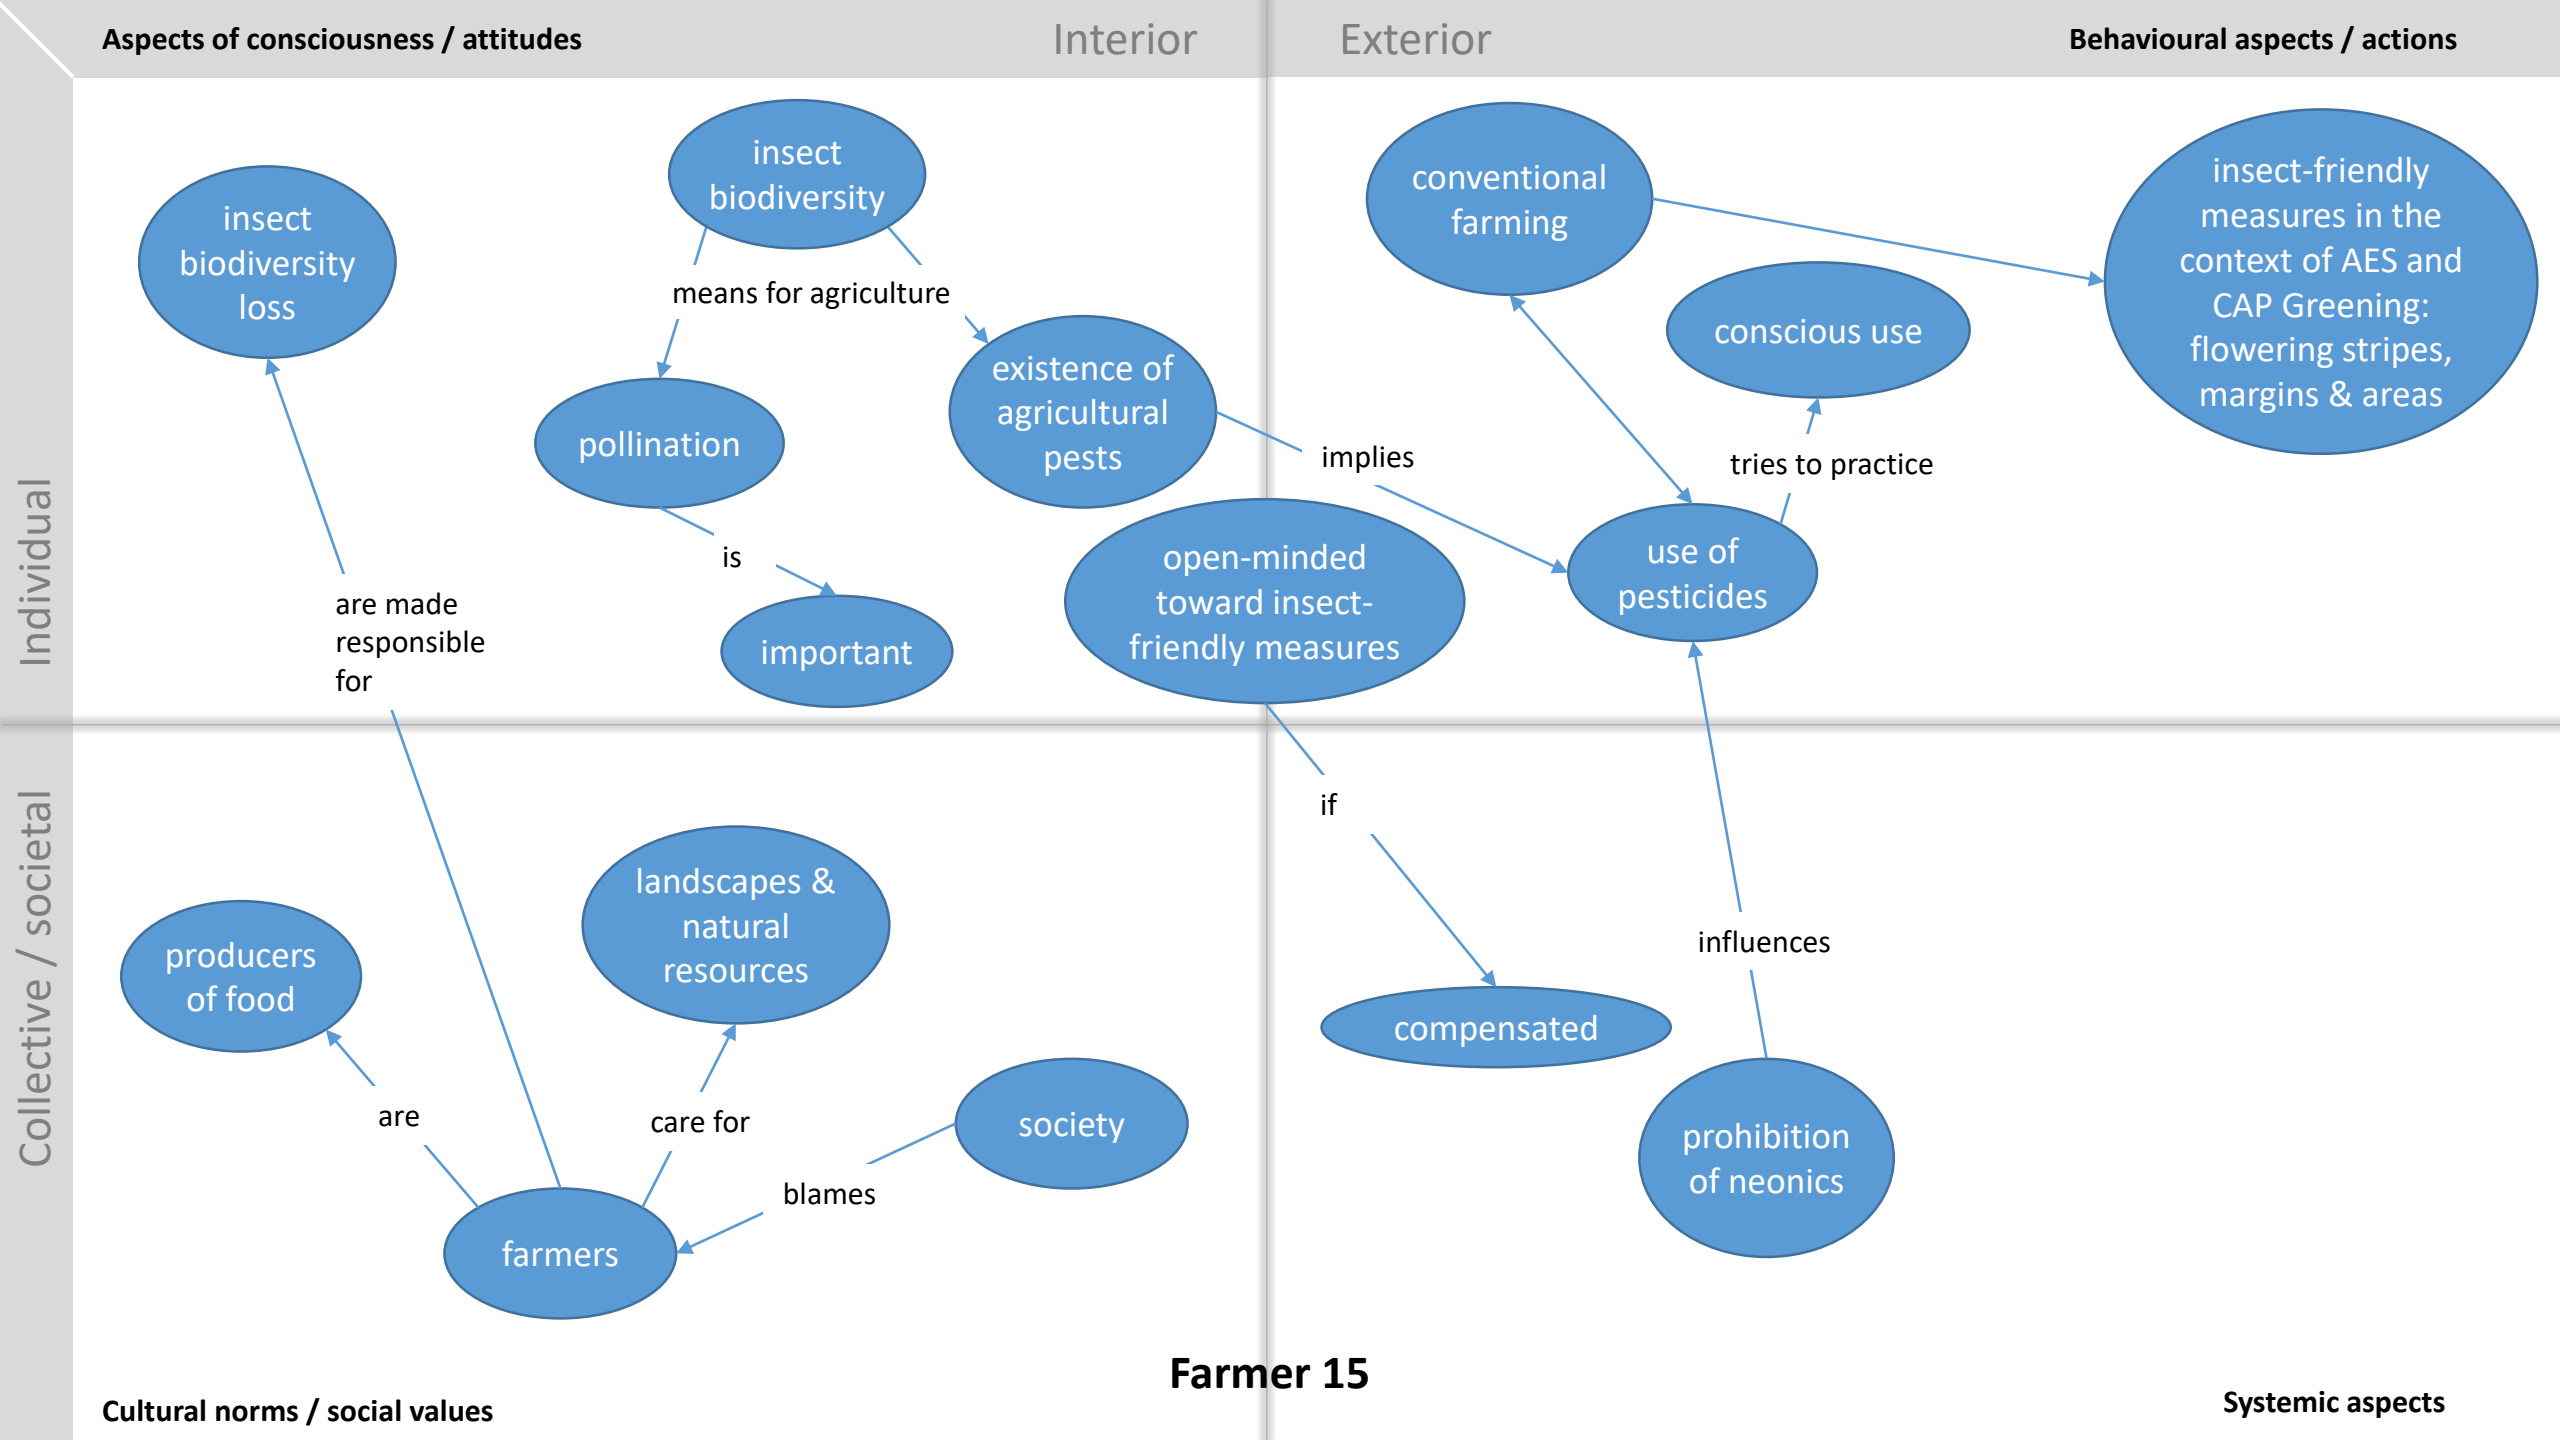



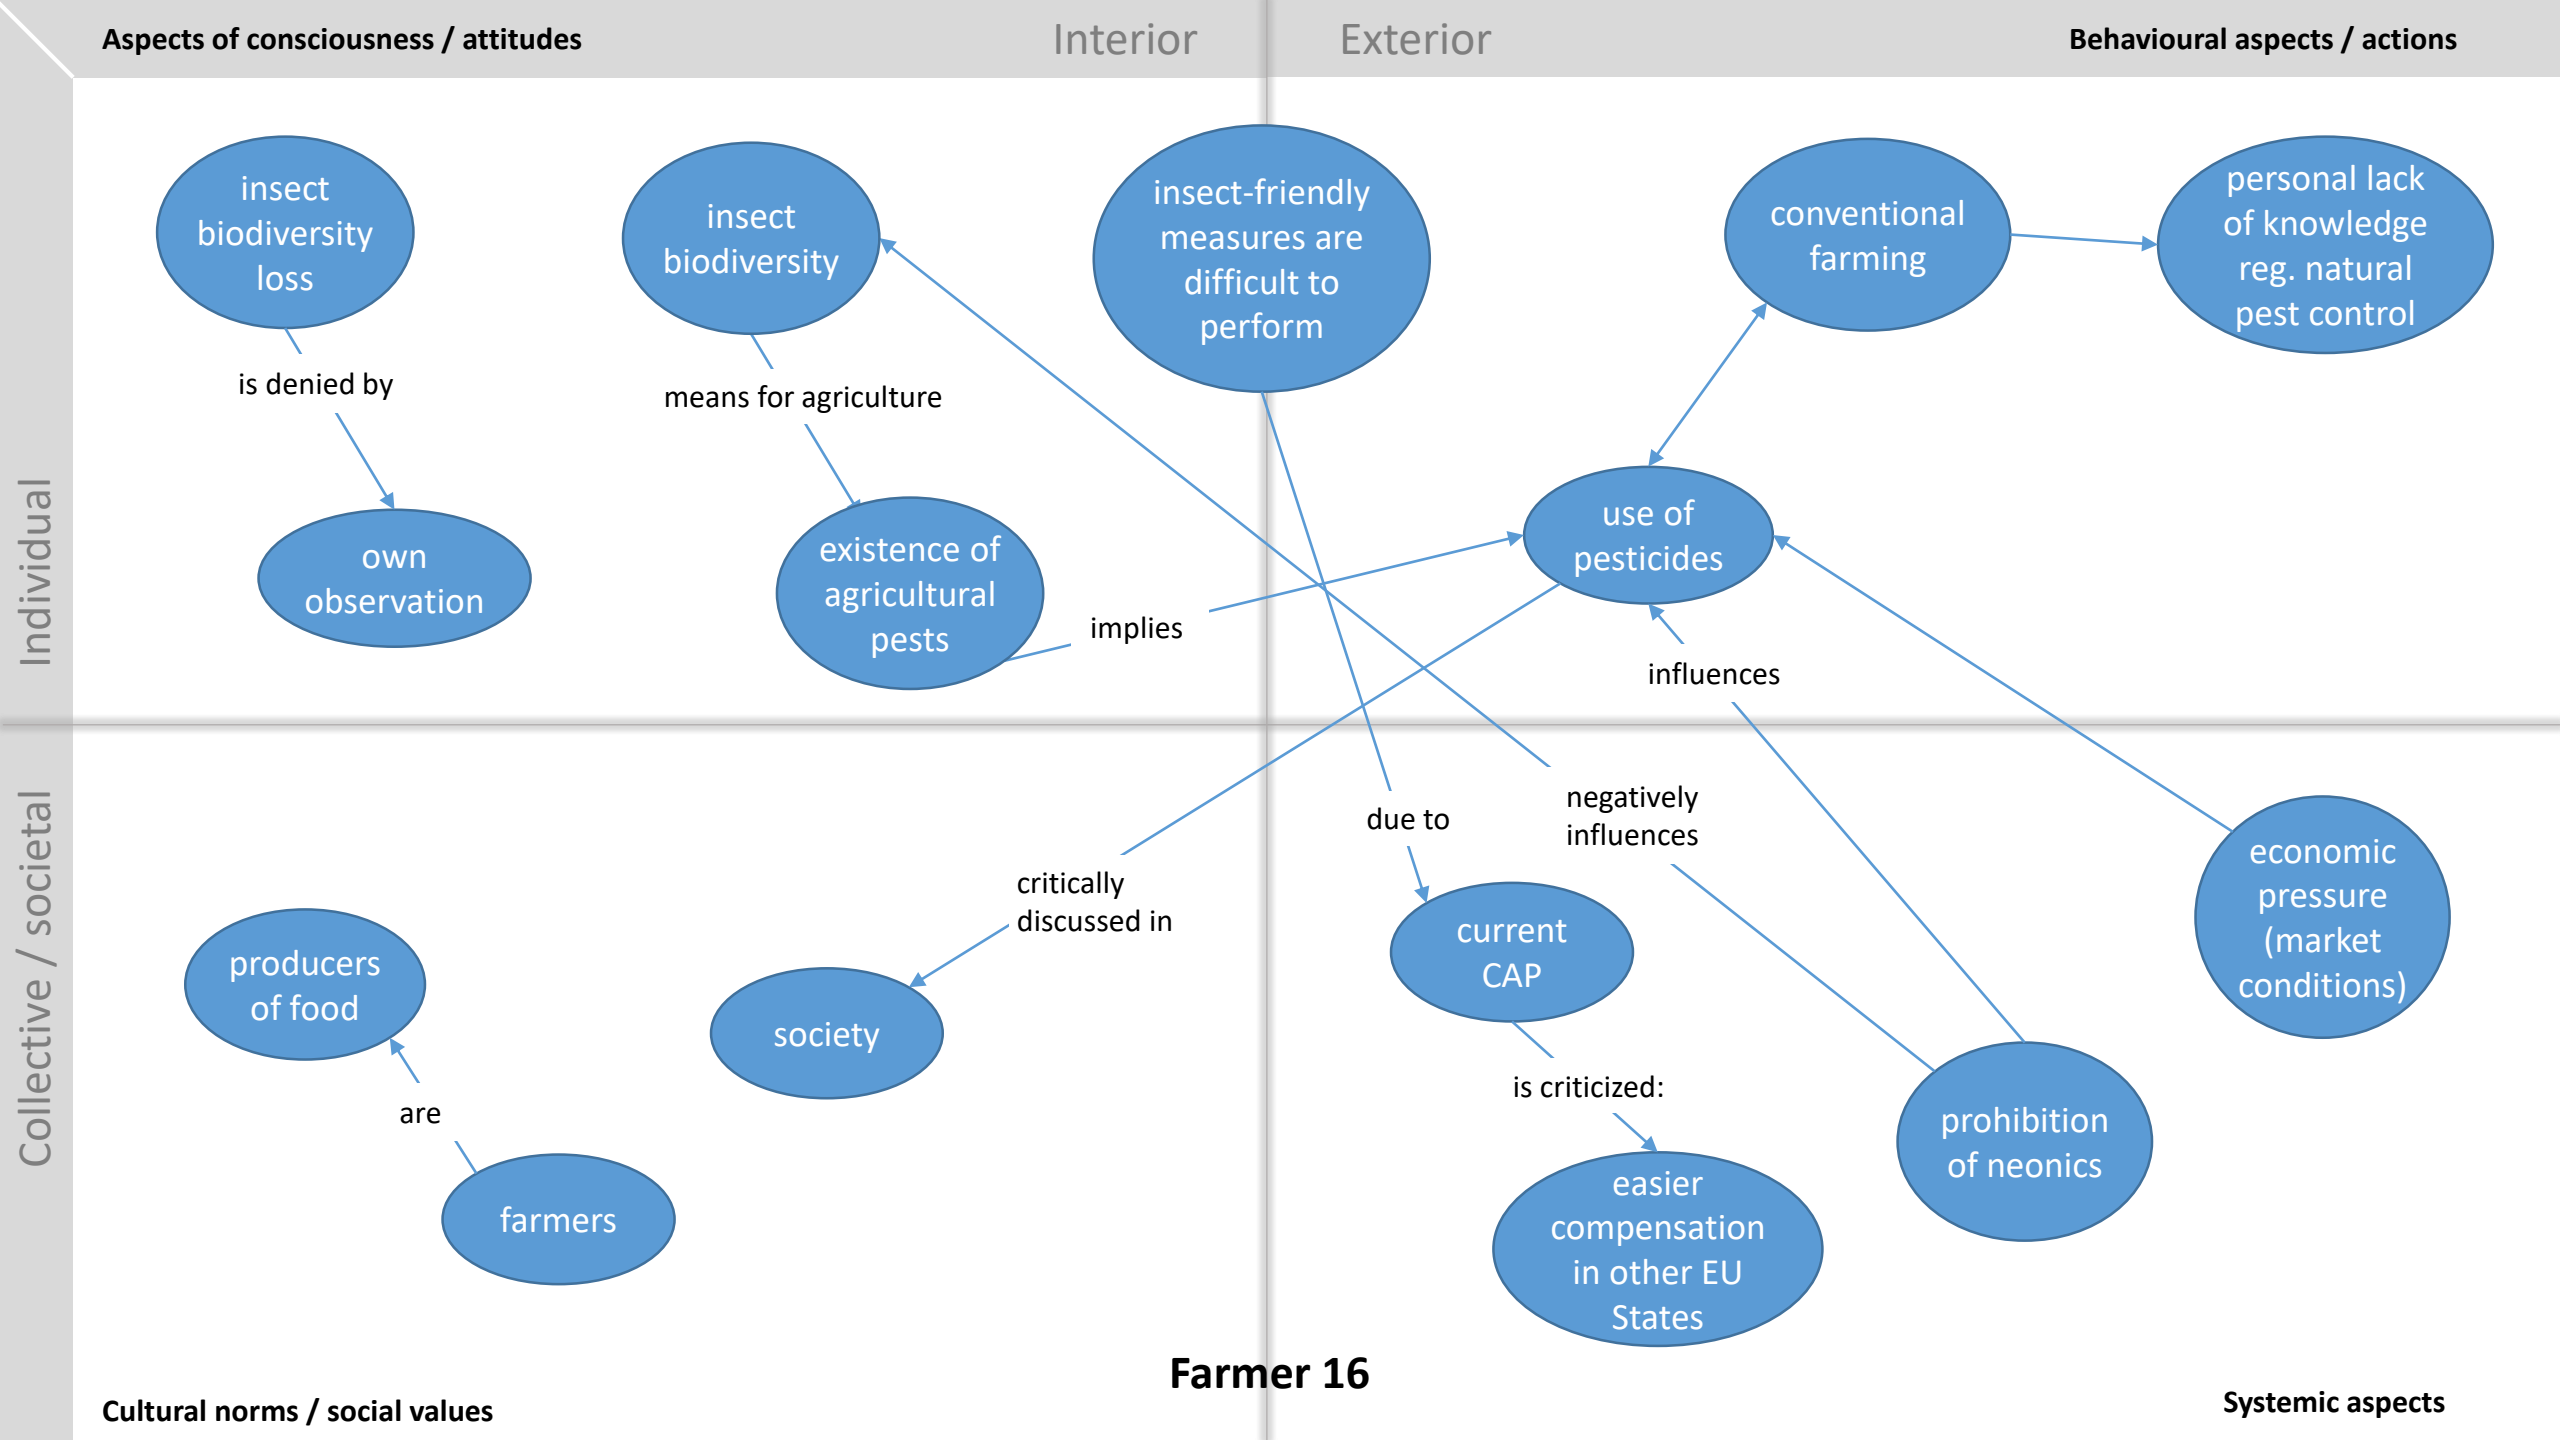

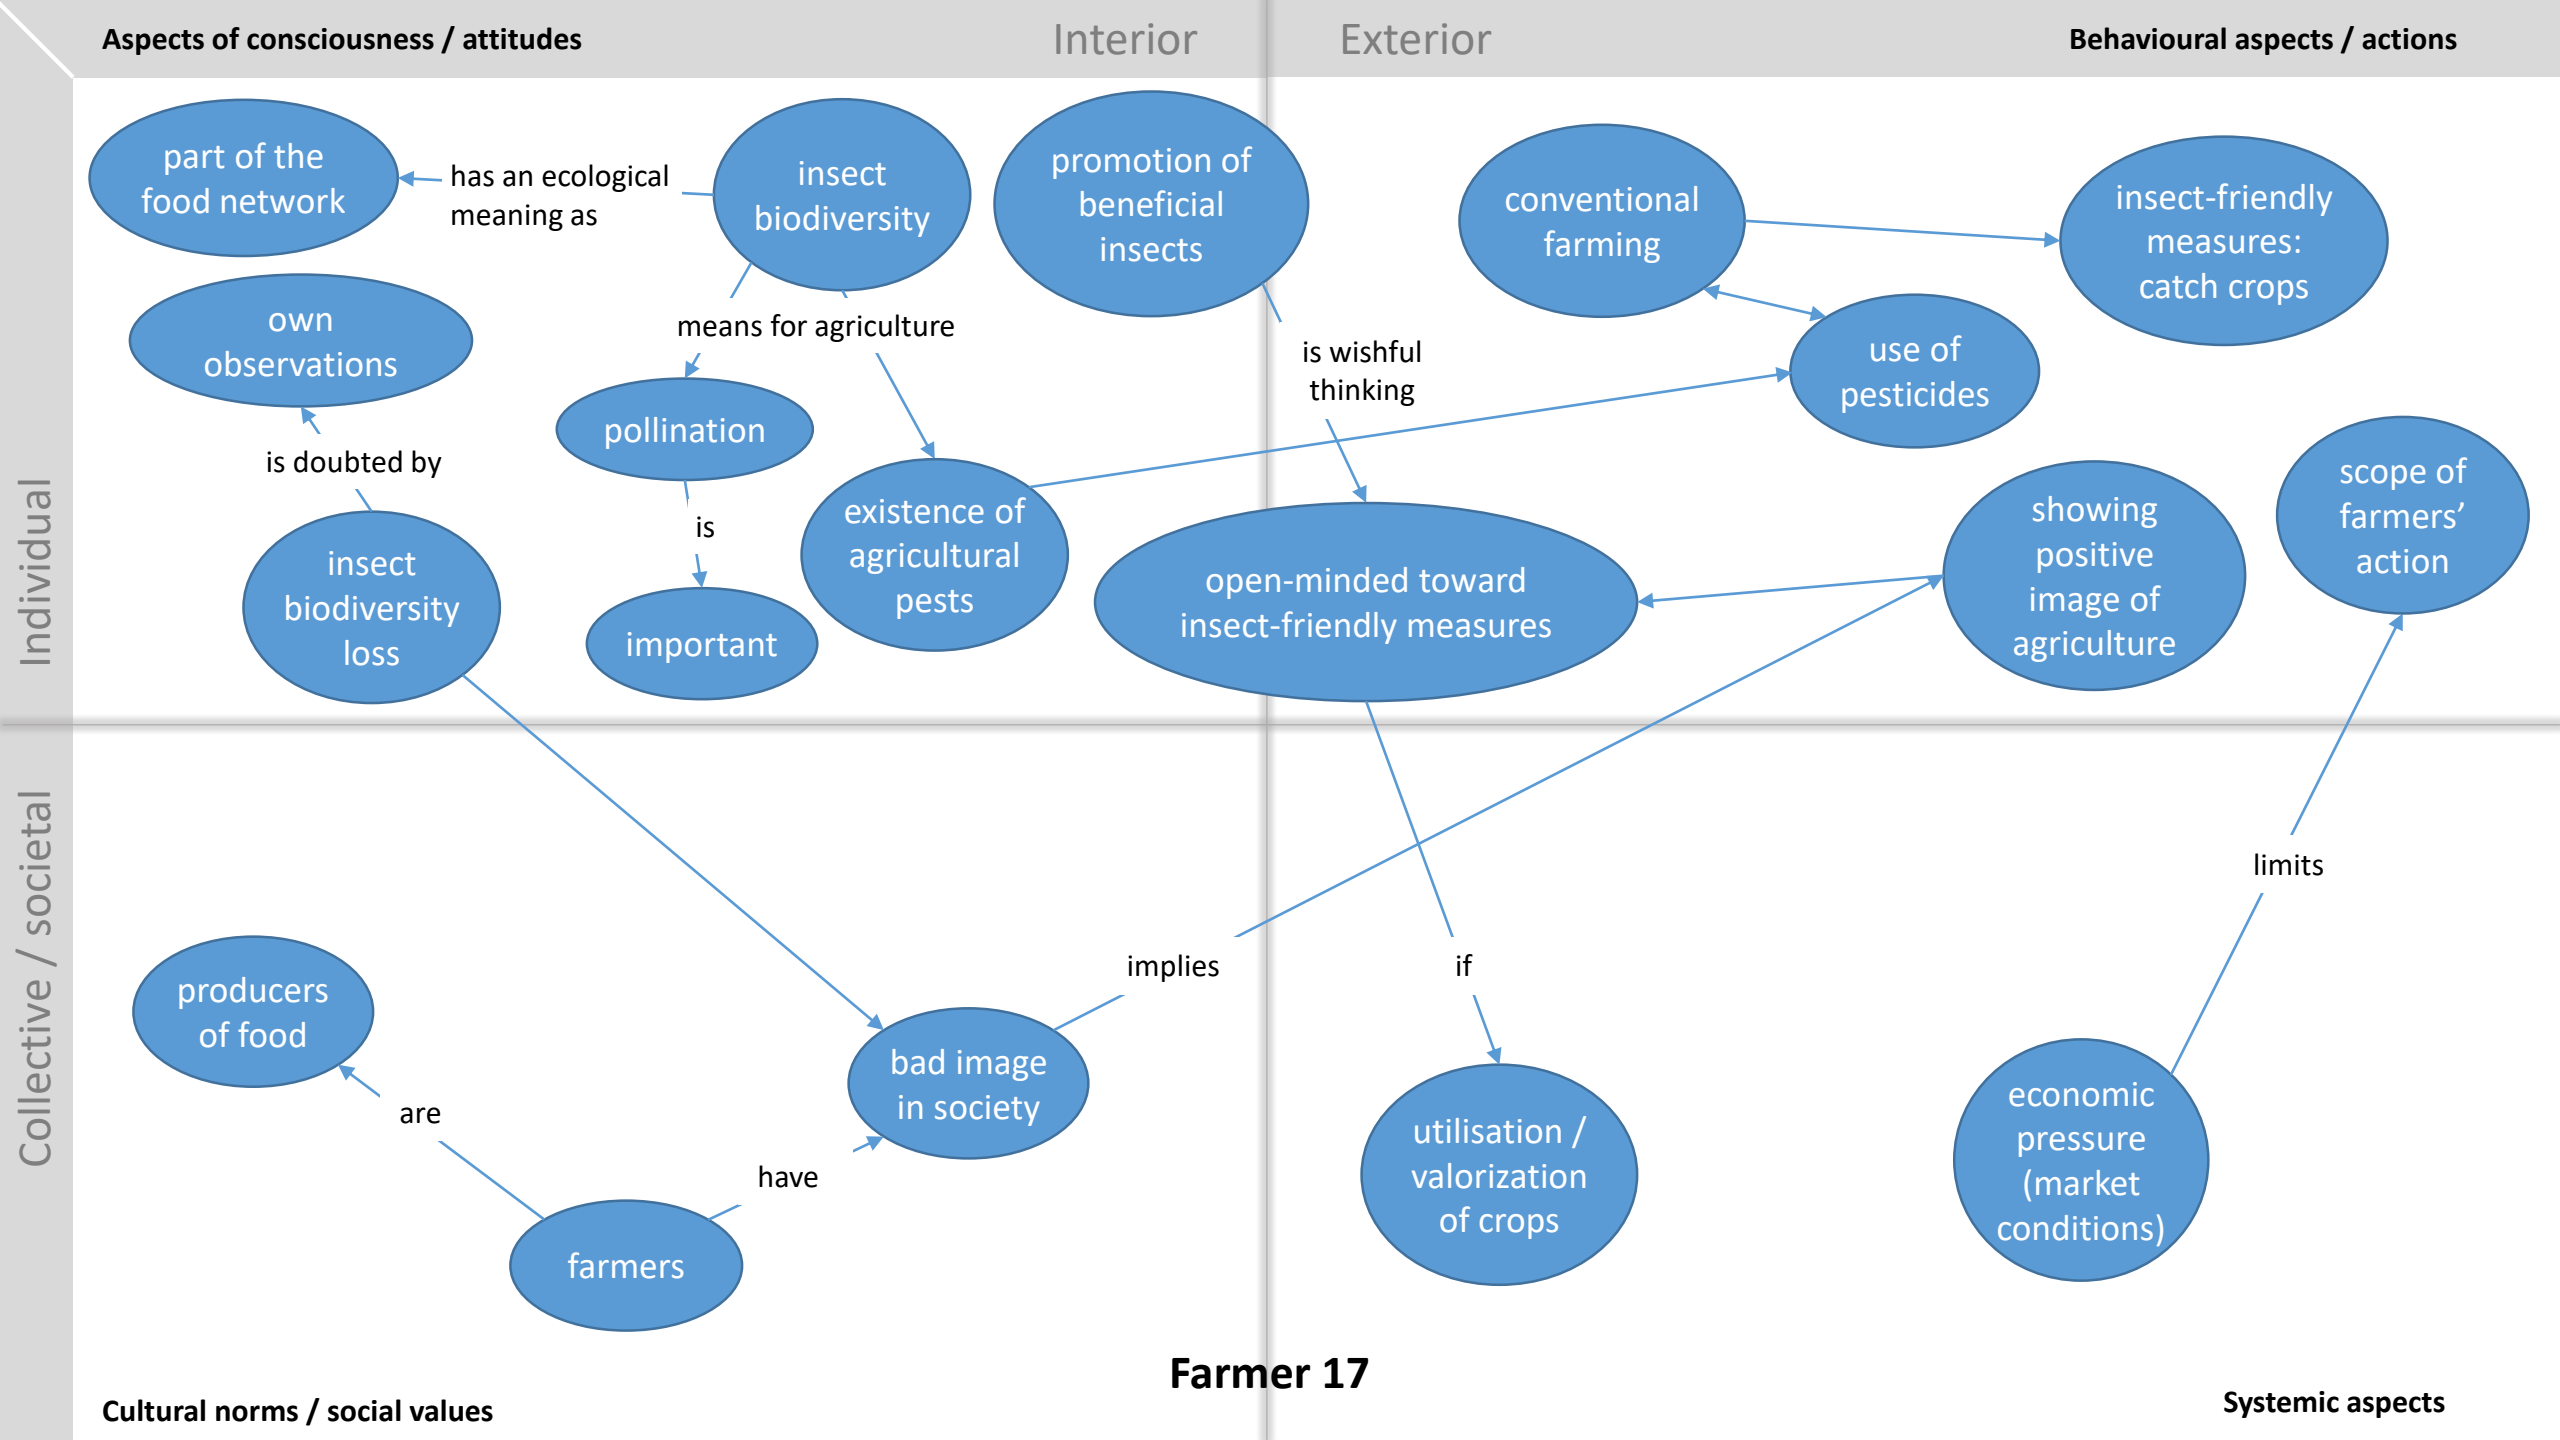

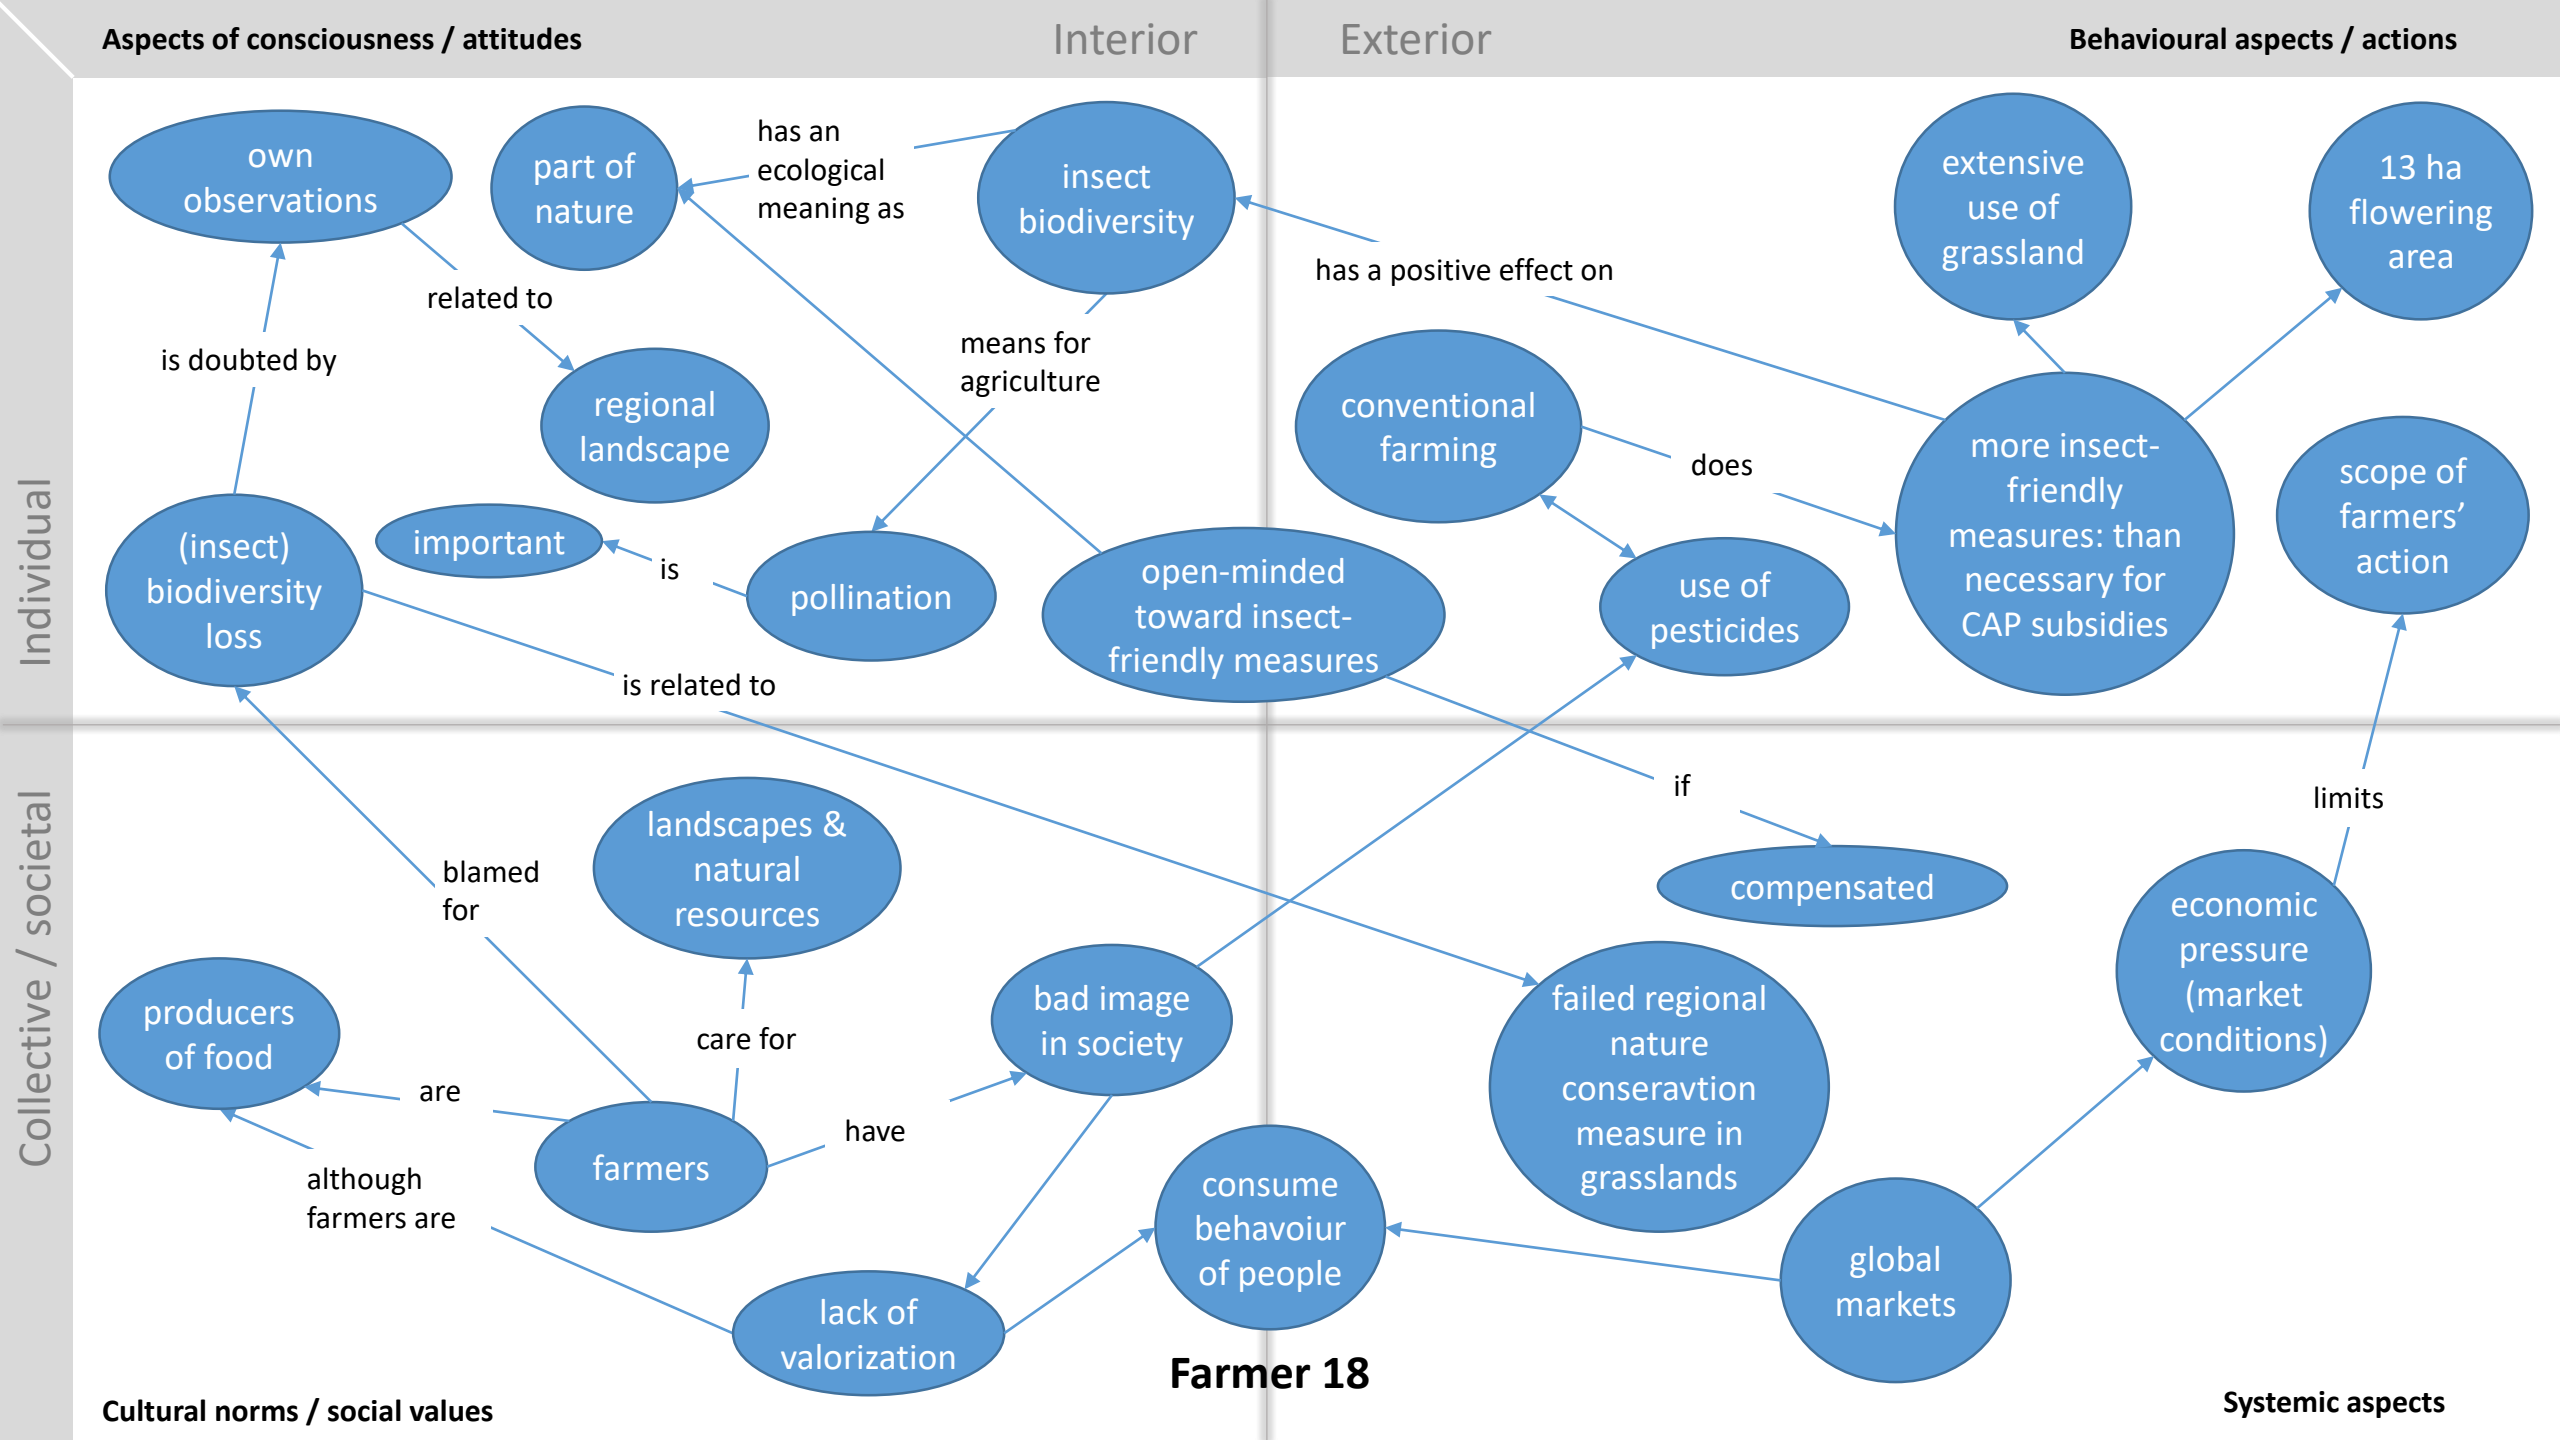

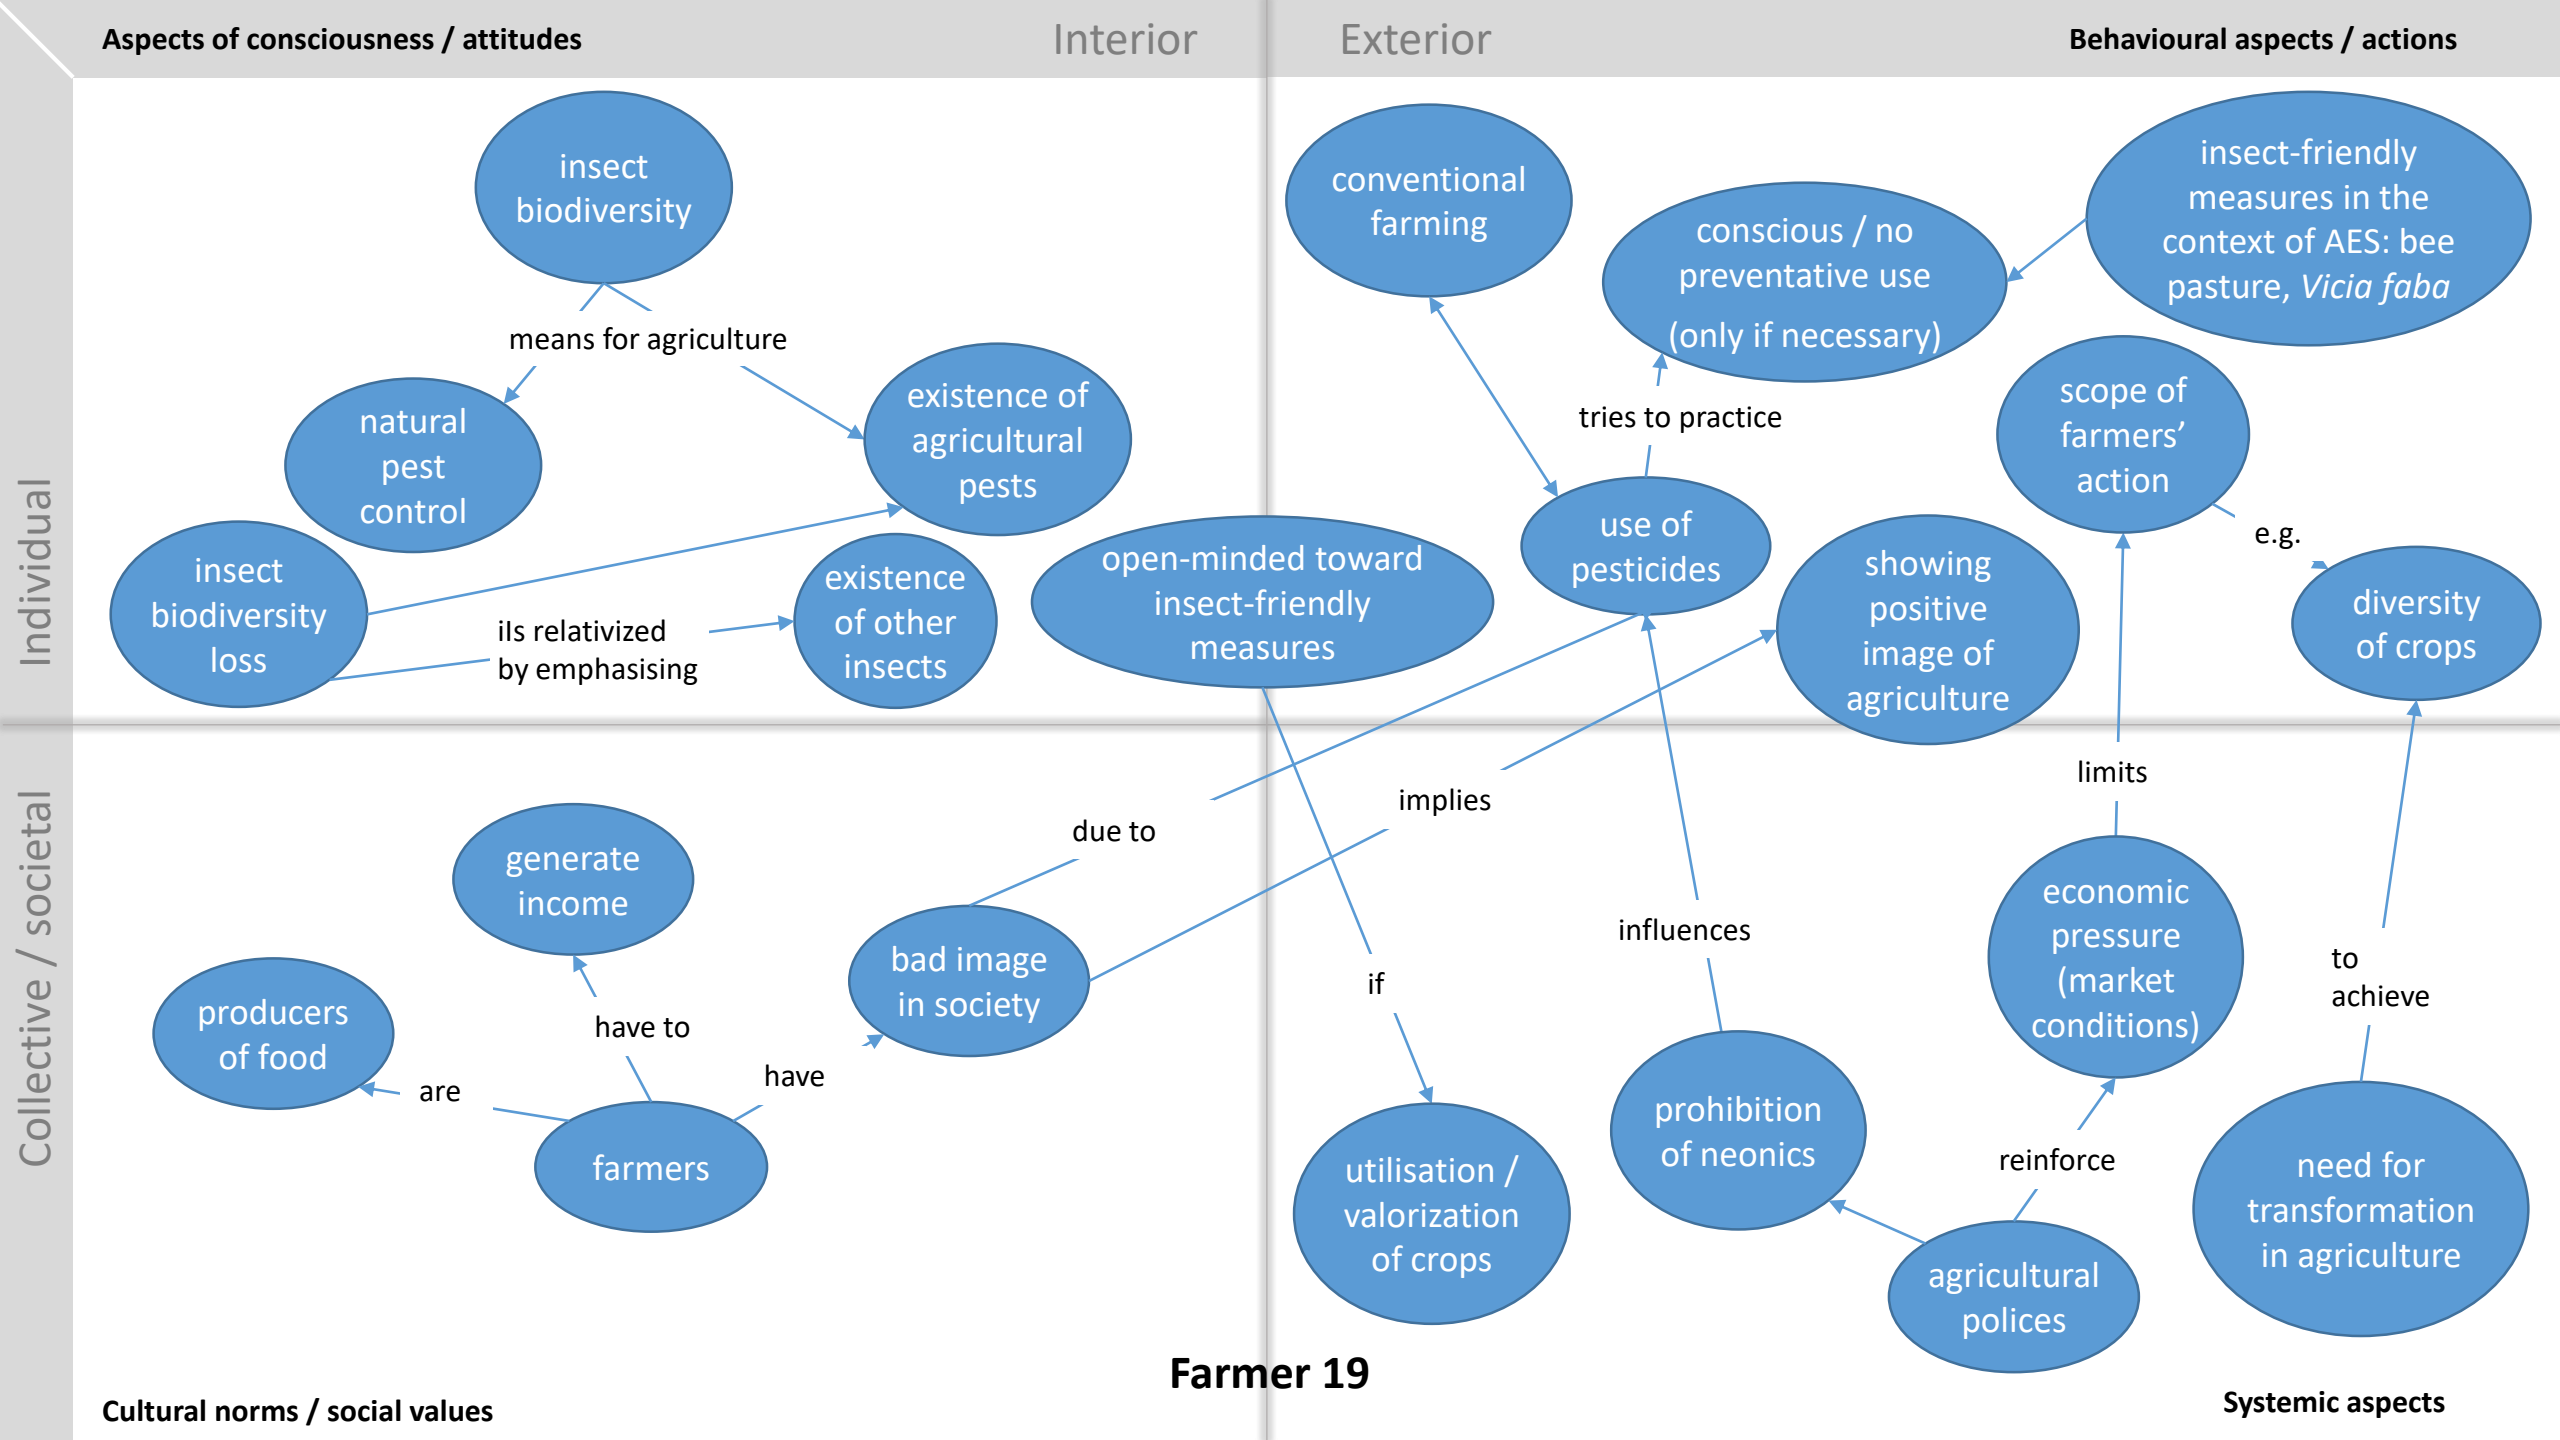

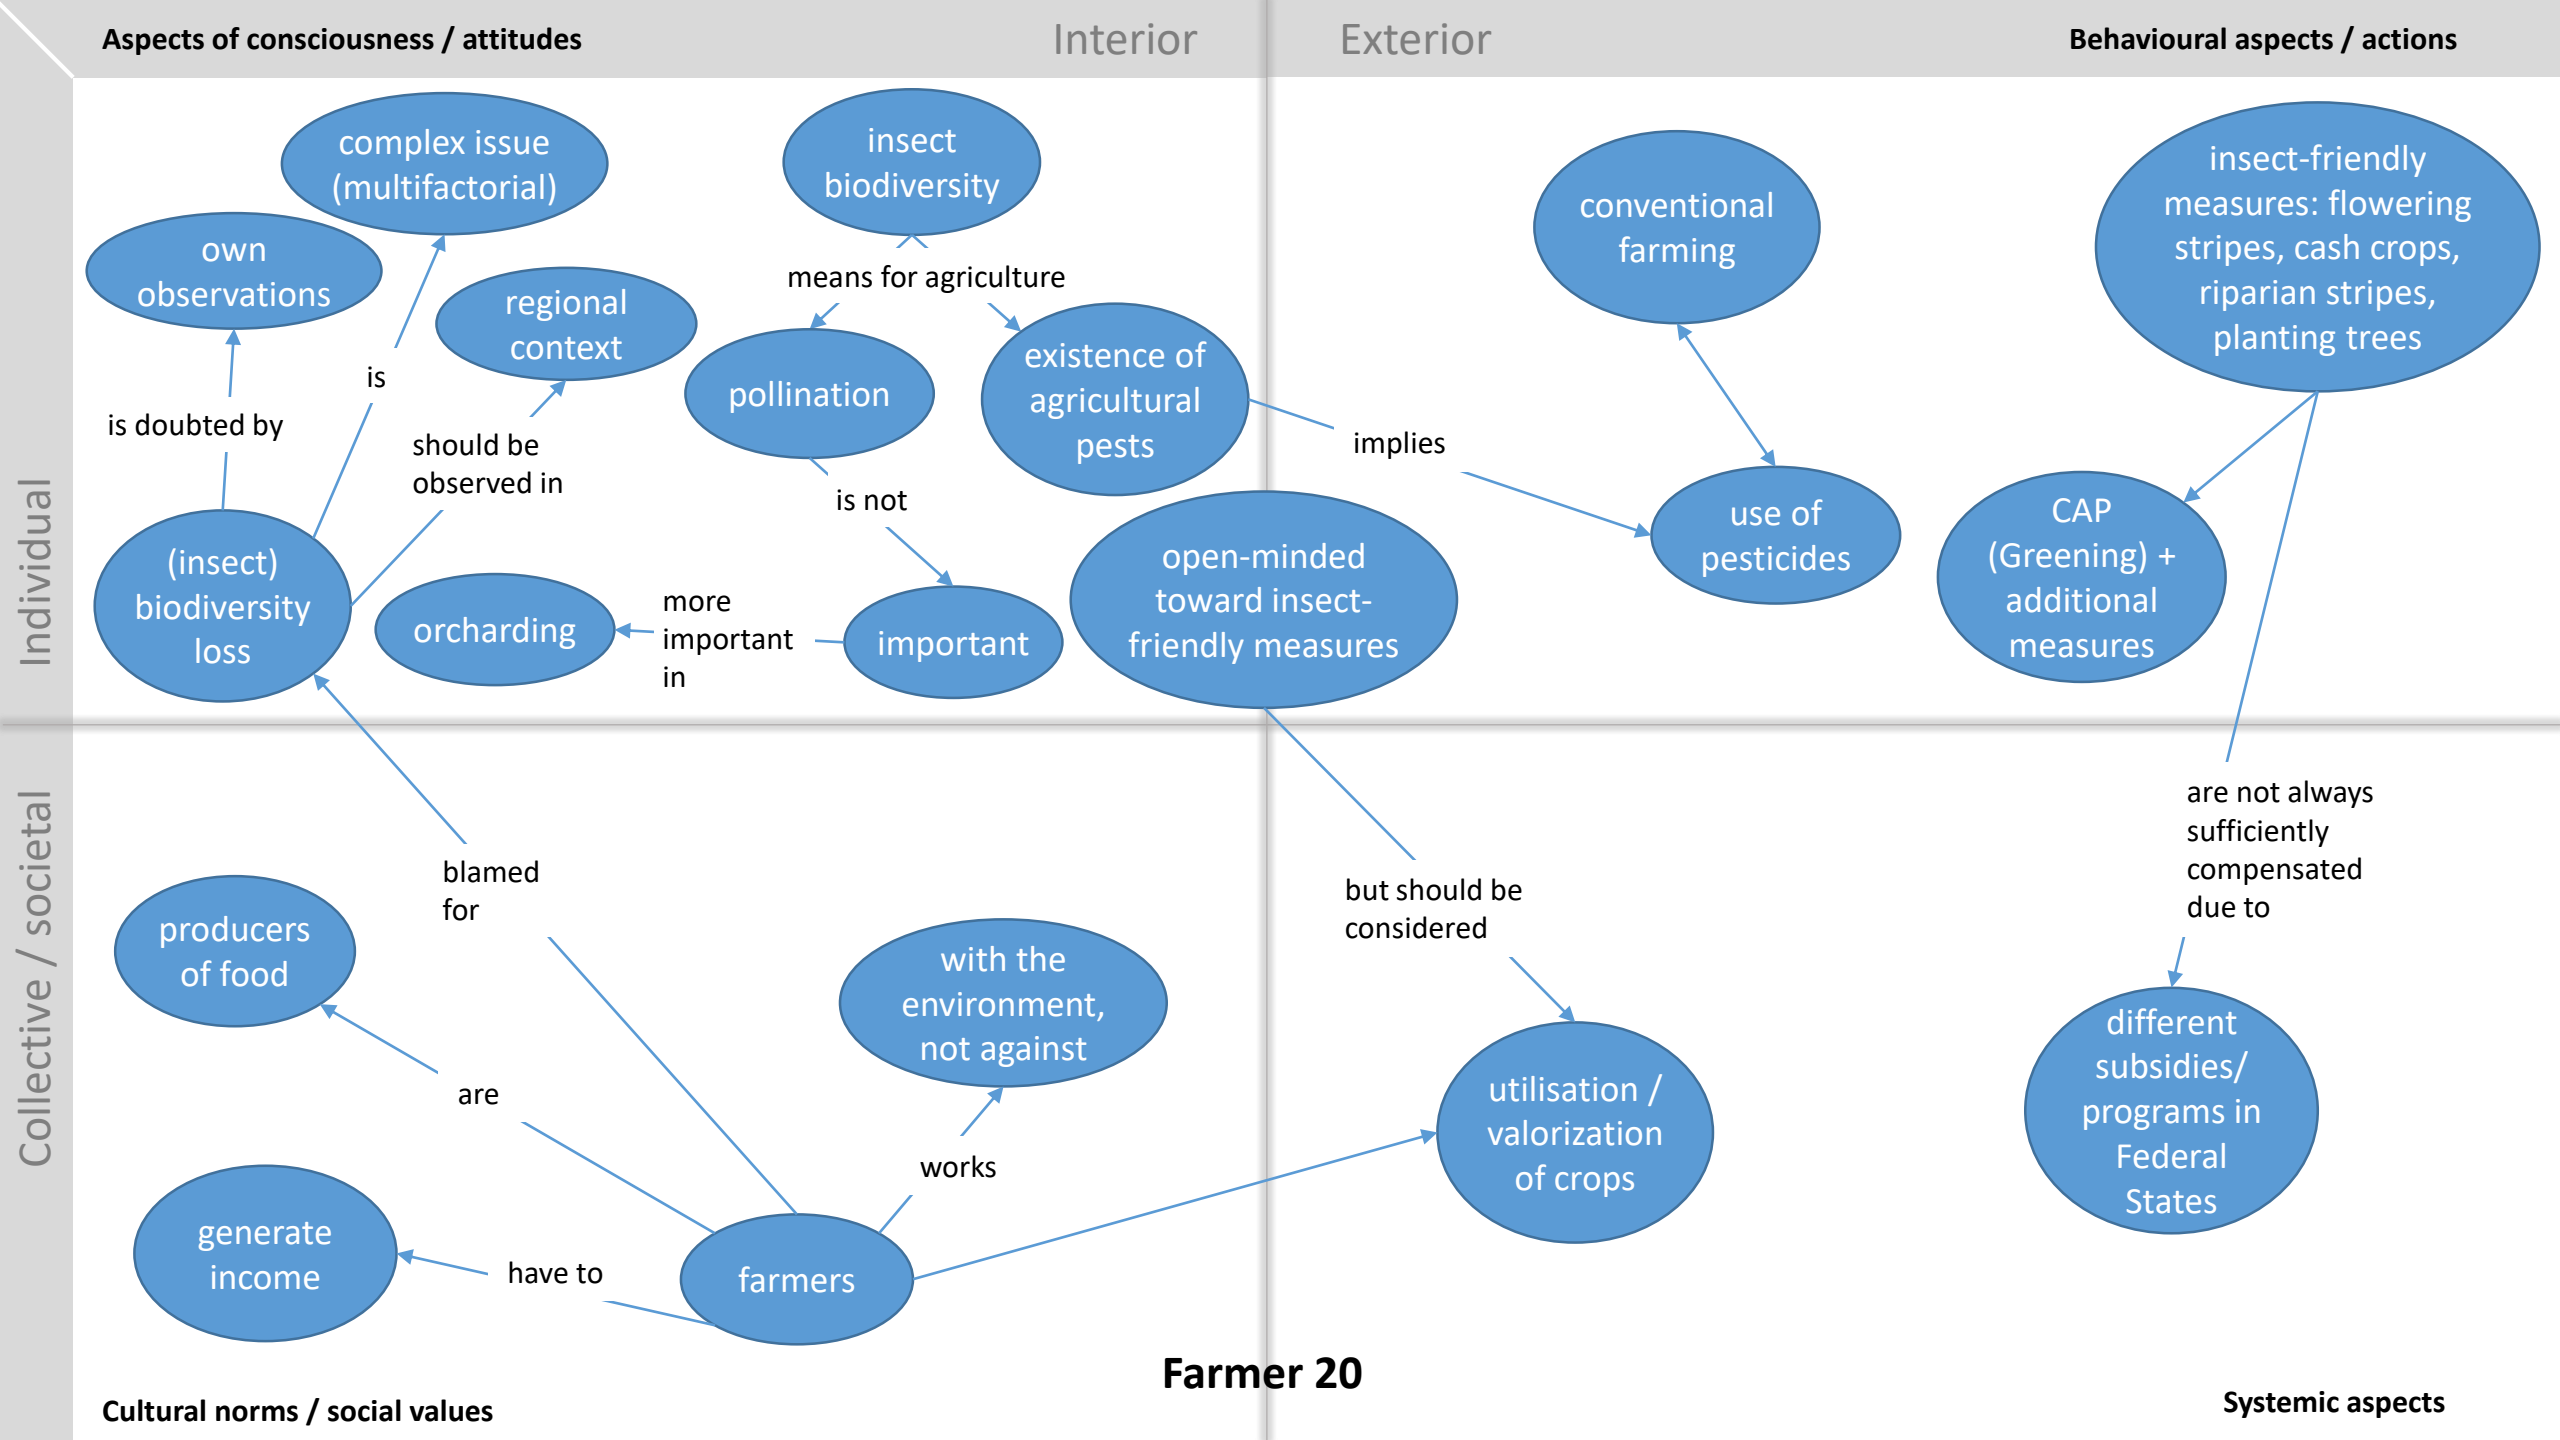



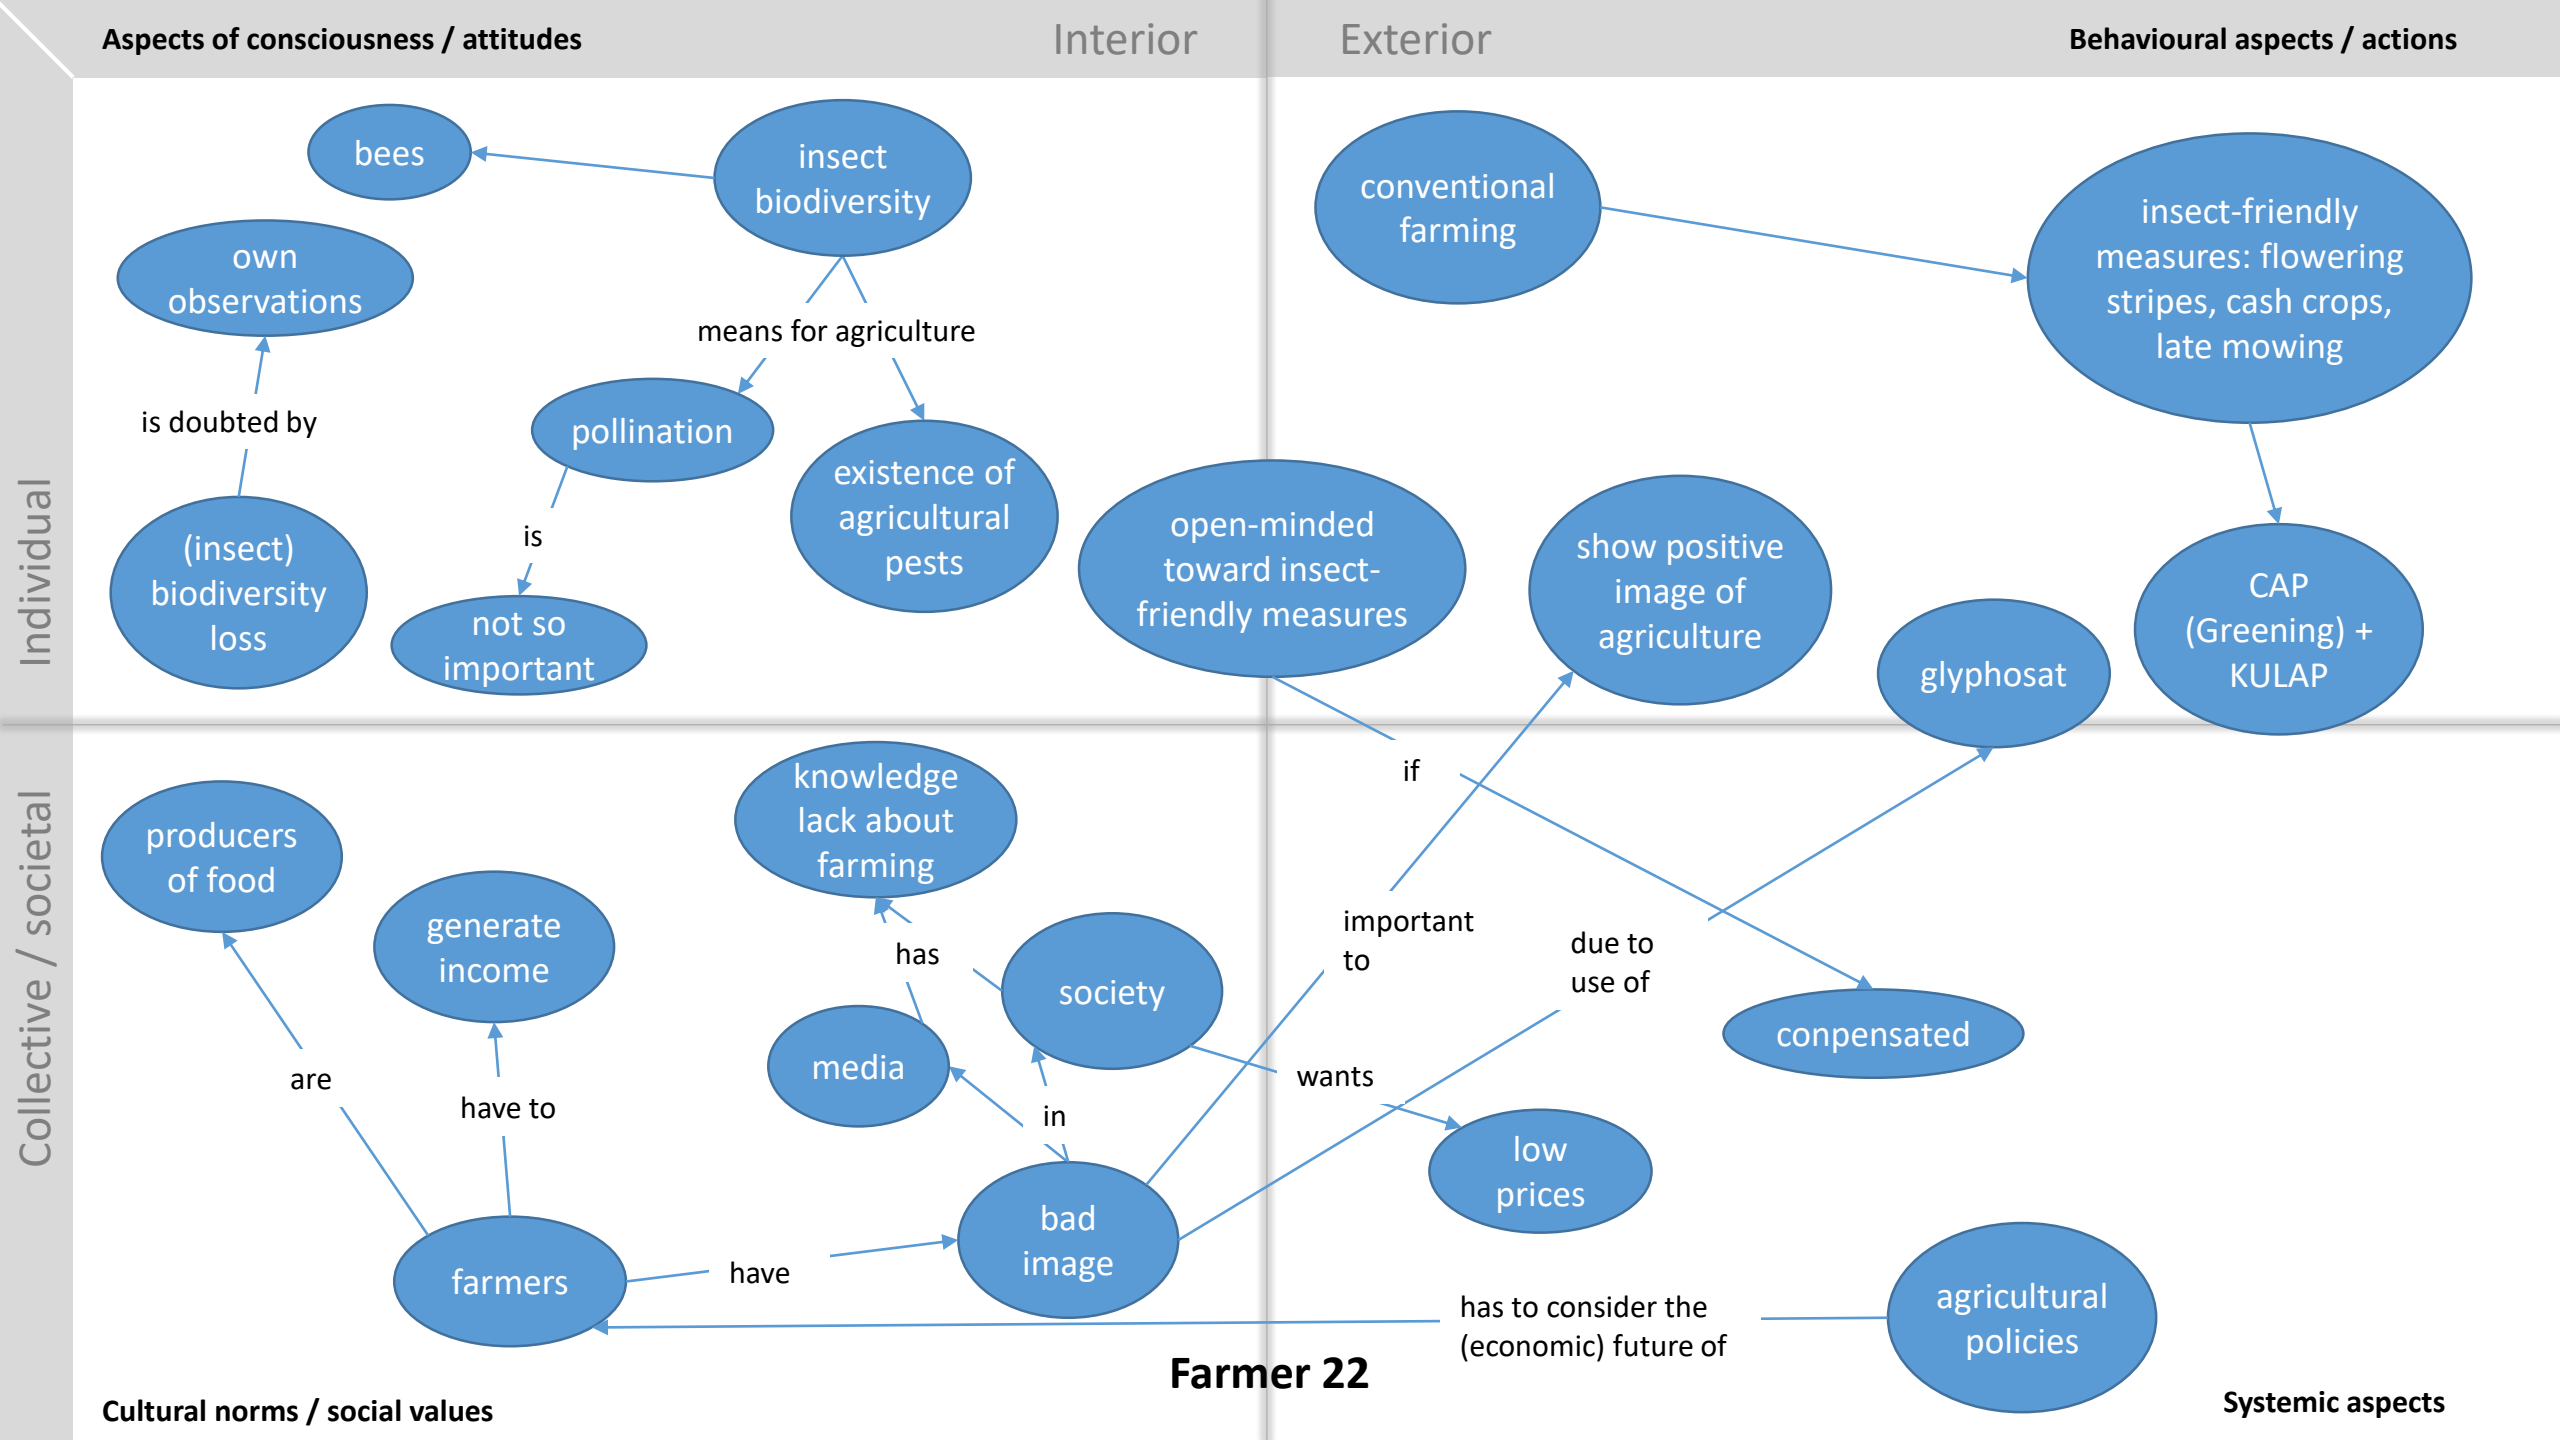



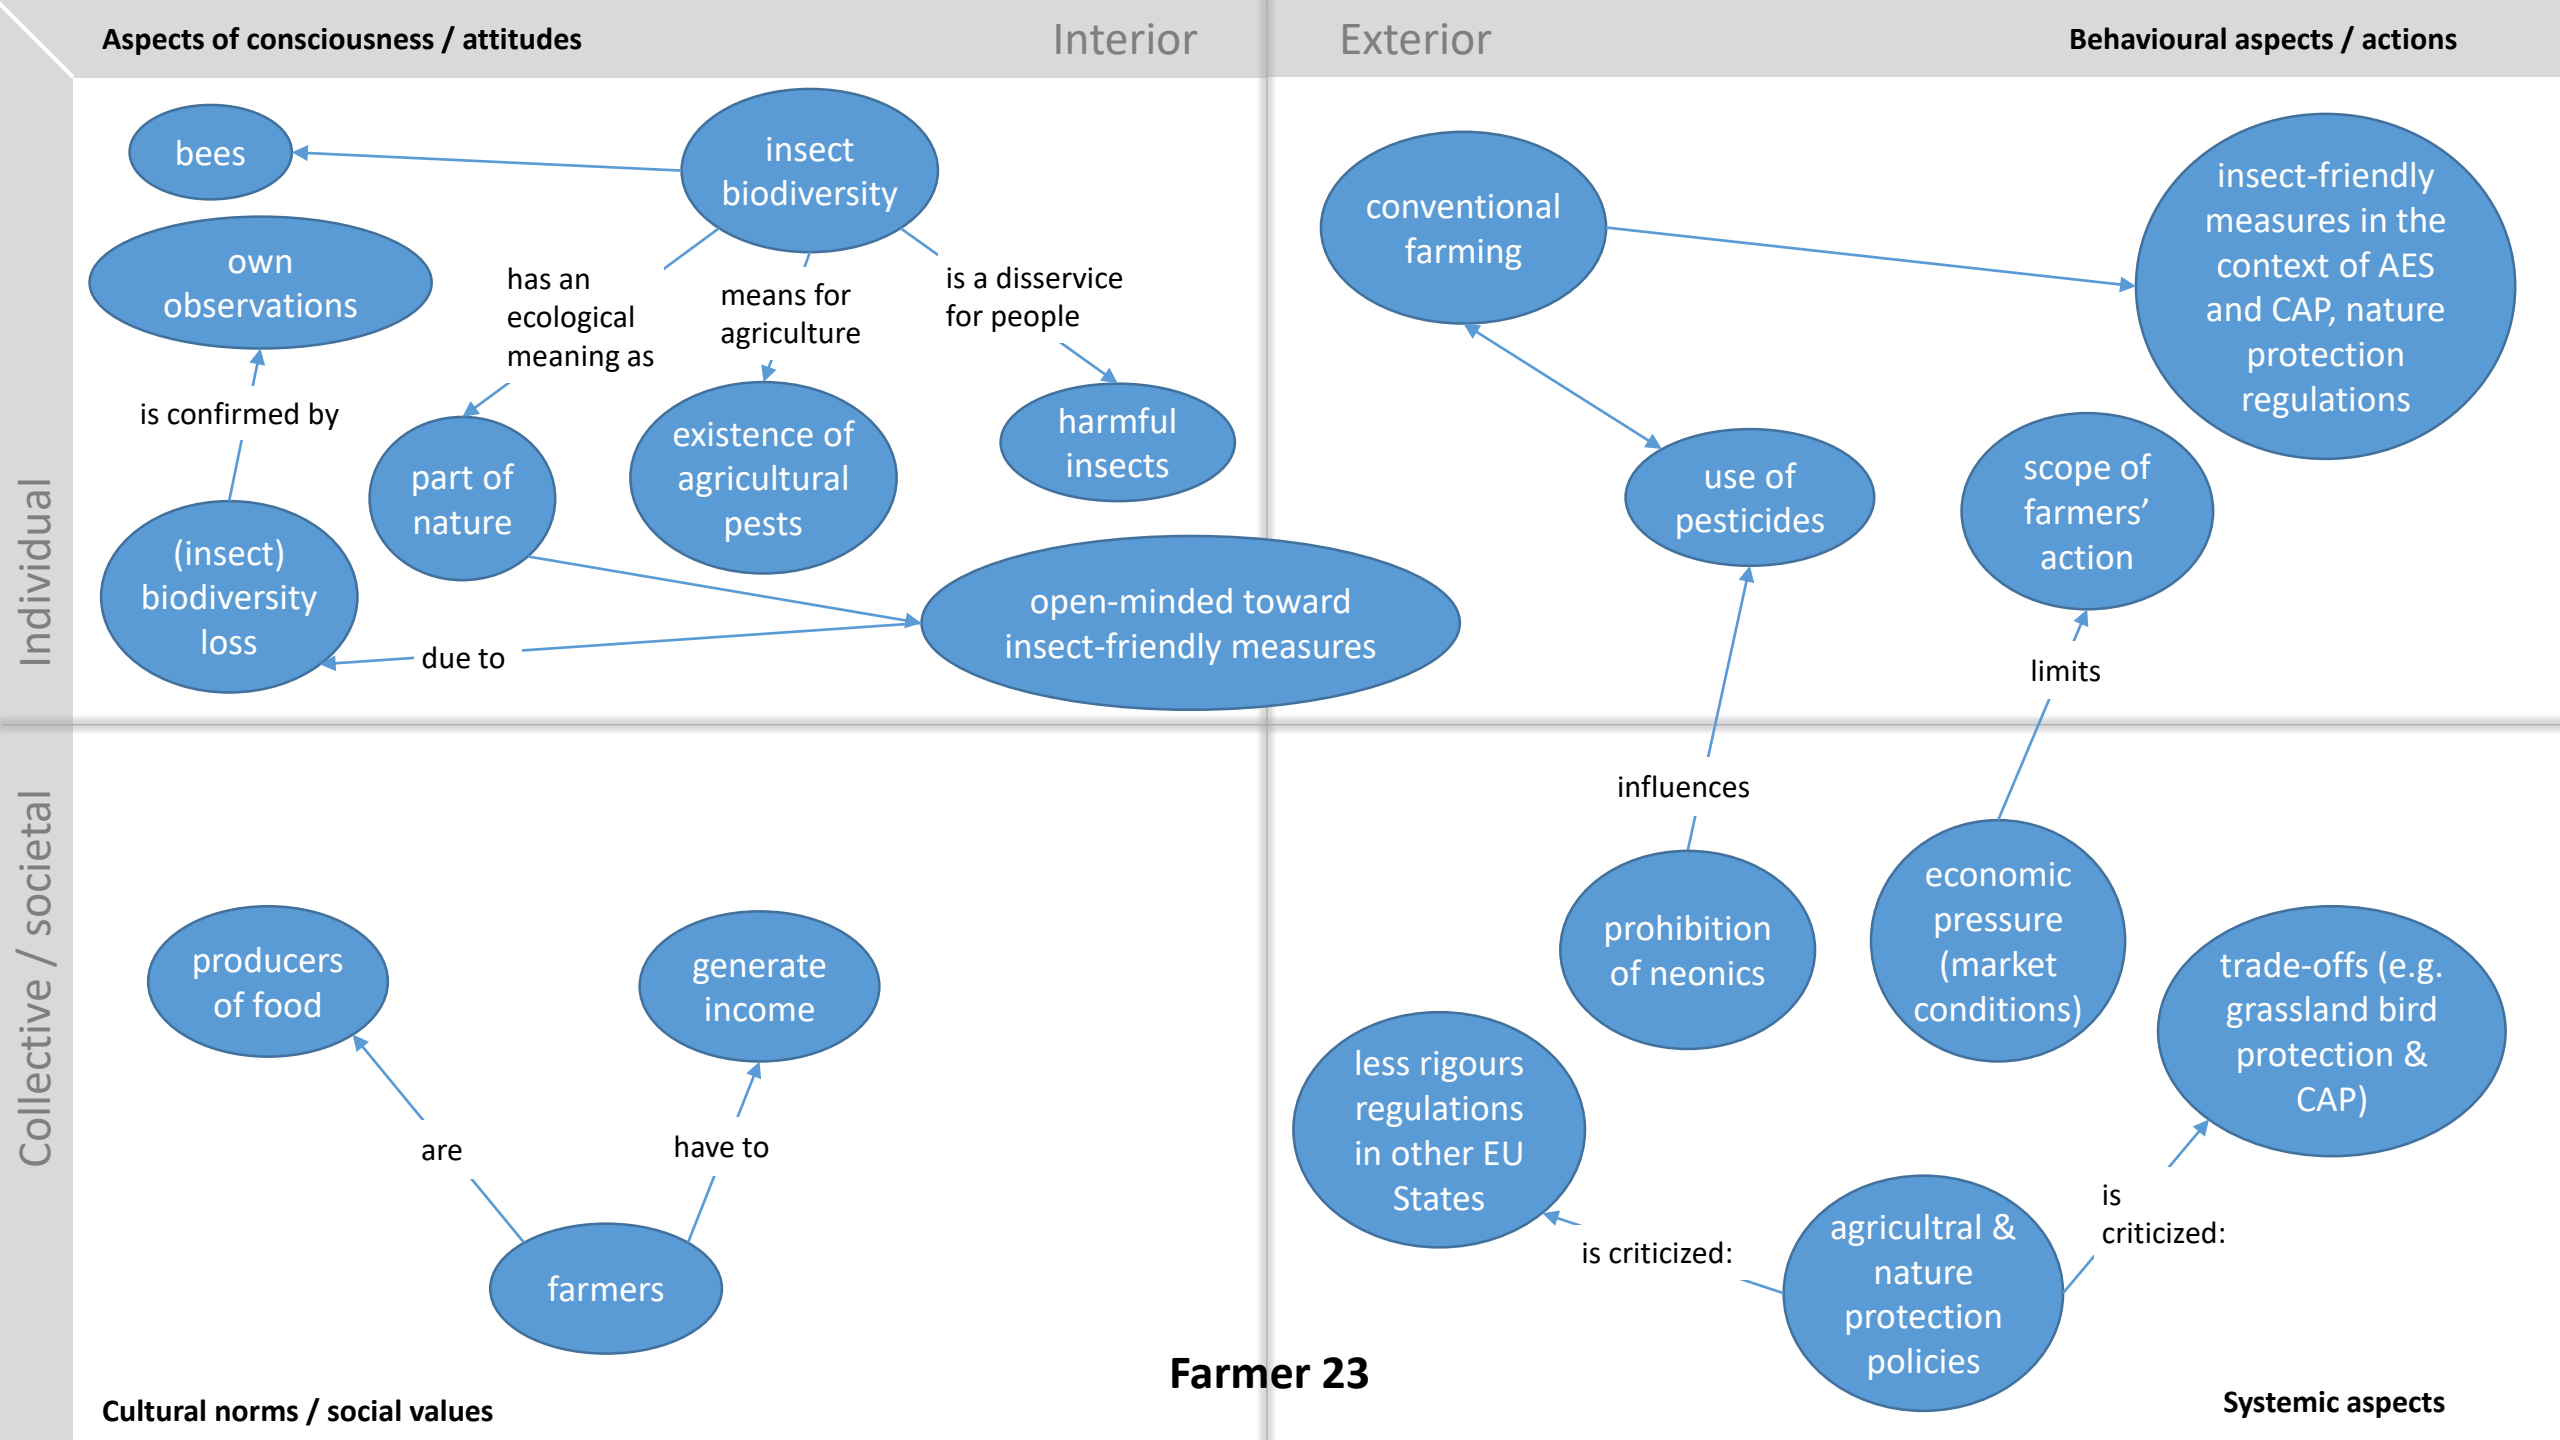

Supplement: MOESM1 [file 19374488]
